# Supplementary material for: 4,5-Disubstituted pyrenes from phenangermoles
Source: Royal Society of Chemistry journal article supplement (doi:10.1039/d2qo01712a), 2022-12-07

## Supporting Information

### 4,5-Disubstituted Pyrenes from Phenangermoles

Cheng-gang Qian and Bin Xiao\*

*Department of Chemistry, University of Science and Technology of China, Hefei 230026, China.*

## List of Content

|                                                                      |    |
|----------------------------------------------------------------------|----|
| 1 General information .....                                          | 2  |
| 1.1 Reagent information .....                                        | 2  |
| 1.2 Analytical information .....                                     | 2  |
| 2. Compounds preparation and characterization .....                  | 2  |
| 2.1 Preparation and characterization of diarylacetylene .....        | 2  |
| 2.2 Preparation and characterization of 4,5-diaryl pyrene .....      | 5  |
| 2.3 Preparation and characterization of phenangermoles .....         | 11 |
| 2.4 Preparation and characterization of multisubstitued pyrene ..... | 17 |
| 3. Aromatization reaction .....                                      | 20 |
| 4. Conversion of propargyl bromide .....                             | 21 |
| 5. Competition experiments .....                                     | 23 |
| 6. Crystal structure determination of 5b .....                       | 24 |
| 6.1 Experimental procedure and crystal data of 5b .....              | 24 |
| 7. Reference .....                                                   | 38 |
| 8. NMR spectra .....                                                 | 39 |

## 1 General information

### 1.1 Reagent information

All reagents were purchased from commercial source and used without further purification unless otherwise noted. Dry DCE, TMEDA, n-BuLi and CD<sub>3</sub>Cl were purchased from J&K Scientific Ltd., PdBr<sub>2</sub> were purchased from Sinocompound company. o-chloranil was purchased from TCI. Me<sub>2</sub>GeCl<sub>2</sub> was purchased from Alfa, AgPF<sub>6</sub>(collidine)<sub>2</sub><sup>1</sup> was synthesized according to reported literatures. Silica gel (300-400 mesh, pH = 6-7, HG/T2354-2010) was purchased from Branch Qingdao Haiyang Chemical Co., Ltd.. Other reagents and solvents were used as received unless otherwise noted.

### 1.2 Analytical information

<sup>1</sup>H-NMR spectra were recorded on 400 MHz spectrometers. Chemical shifts of <sup>1</sup>H-NMR spectra were reported in parts per million relative to tetramethylsilane (δ = 0). Data for <sup>1</sup>H-NMR were reported as follows: chemical shift (δ ppm), multiplicity, coupling constant (Hz), and integration. <sup>13</sup>C-NMR spectra were recorded on 101 MHz spectrometers. Chemical shifts were reported in parts per million relative to the solvent resonance as the internal standard (CDCl<sub>3</sub>, δ 77.2 ppm). Data for <sup>13</sup>C-NMR are reported in terms of chemical shift (δ ppm), multiplicity, and coupling constant (Hz). High-resolution mass spectra (HRMS) were recorded on an Acquity UPLC-Xevo G2 QToF instrument with ESI mode or Thermo Scientific Q Exactive GC Mass Spectrometer with EI mode unless otherwise stated. Organic solutions were concentrated under reduced pressure on a Buchi rotary evaporator. Chromatographic purification of products was accomplished using column chromatography on silica gel.

## 2. Compounds preparation and characterization

### 2.1 Preparation and characterization of diarylacetylene

#### General Procedure A:

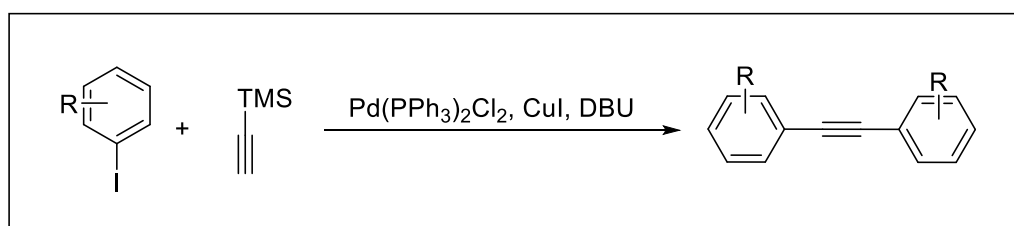

Starting material iodide (2 mmol), PdCl<sub>2</sub>(PPh<sub>3</sub>)<sub>2</sub> (85.9 mg, 0.12 mmol, 6 mol%) and CuI (38.1 mg, 0.2 mmol, 10 mol%) was placed into a Schlenk tube equipped with a stir bar. The tube was vacuumed and backfilled with argon for three cycles. While stirring, dry THF (10 mL) was added, DBU (1.8 mL, 12 mmol, 6 eq.) and distilled water (14.5 μL, 0.8 mmol, 40 mol%) were then added. Finally trimethylsilylacetylene (144 μL, 1 mmol, 0.5 eq.) was added.<sup>2</sup> The reaction mixture was stirred at room temperature for 18 h, at the end of which the reaction mixture is partitioned in EtOAc and distilled water (20 mL each). The combined organic layers were washed with brine, and then dried over Na<sub>2</sub>SO<sub>4</sub>. After filtration, the solvents were removed under reduced pressure to give the crude product. The crude product is purified by silica gel column chromatography.

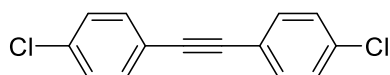

**1,2-bis(4-chlorophenyl)ethyne(2c)**

According to General Procedure A, starting material: 1-chloro-4-iodobenzene, the title compound was isolated by silica gel column chromatography using petroleum ether as eluent in 81% yield, 199.9 mg, yellow solid.

$^1\text{H NMR}$  (400 MHz,  $\text{CDCl}_3$ )  $\delta$  7.48 – 7.42 (m, 4H), 7.36 – 7.30 (m, 4H).

$^{13}\text{C NMR}$  (101 MHz,  $\text{CDCl}_3$ )  $\delta$  134.51, 132.80, 128.77, 121.40, 89.17.

HRMS (EI)  $m/z$  ( $\text{M}^{+\bullet}$ ) Calcd for  $\text{C}_{14}\text{H}_8\text{Cl}_2$ : 246.0003; Found: 245.99988.

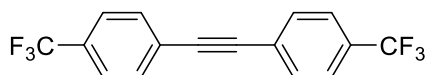

**1,2-bis(4-(trifluoromethyl)phenyl)ethyne(2f)**

According to General Procedure A, starting material: 4-iodobenzotrifluoride, the title compound was isolated by silica gel column chromatography using petroleum ether as eluent in 75% yield, 236.1 mg, white solid.

$^1\text{H NMR}$  (400 MHz,  $\text{CDCl}_3$ )  $\delta$  7.76 – 7.58 (m, 8H).

$^{13}\text{C NMR}$  (101 MHz,  $\text{CDCl}_3$ )  $\delta$  131.98, 130.48 (q,  $J$  = 33 Hz), 126.36, 125.39 (q,  $J$  = 4 Hz), 123.83 (q,  $J$  = 271 Hz), 90.12.

$^{19}\text{F NMR}$  (471 MHz,  $\text{CDCl}_3$ )  $\delta$  -62.86.

HRMS (ESI)  $m/z$  ( $[\text{M}+\text{Na}]^+$ ) Calcd for  $\text{C}_{16}\text{H}_8\text{F}_6\text{Na}$ : 337.0428; Found: 337.0439.

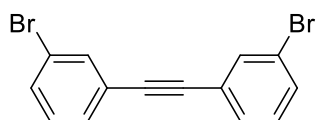

**1,2-bis(3-bromophenyl)ethyne(2g)**

According to General Procedure A, starting material: 1-bromo-3-iodobenzene, the title compound was isolated by silica gel column chromatography using petroleum ether as eluent in 73% yield, 244.9 mg, white solid.

$^1\text{H NMR}$  (400 MHz,  $\text{CDCl}_3$ )  $\delta$  7.68 (t,  $J$  = 1.8 Hz, 2H), 7.49 (ddd,  $J$  = 8.1, 2.0, 1.0 Hz, 2H), 7.44 (dt,  $J$  = 7.7, 1.3 Hz, 2H), 7.23 (t,  $J$  = 7.9 Hz, 2H).

$^{13}\text{C NMR}$  (101 MHz,  $\text{CDCl}_3$ )  $\delta$  134.37, 131.76, 130.20, 129.85, 124.74, 122.22, 89.00.

HRMS (EI)  $m/z$  ( $\text{M}^{+\bullet}$ ) Calcd for  $\text{C}_{14}\text{H}_8\text{Br}_2$ : 333.8993; Found: 333.8987.

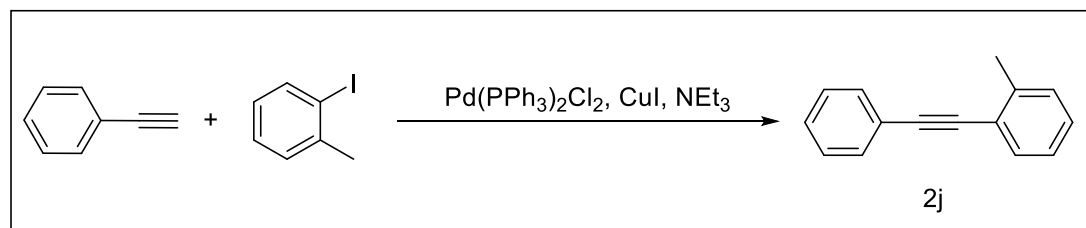

**1-methyl-2-(phenylethynyl)benzene(2j)**

1-iodo-2-methylbenzene (0.26 mL, 2 mmol),  $\text{Pd}(\text{PPh}_3)_2\text{Cl}_2$  (28.6 mg, 0.04 mmol, 2 mol%) and  $\text{CuI}$  (15.2 mg, 0.08 mmol, 4 mol%) were placed into a Schlenk tube equipped with a stir bar. The tube was vacuumed and backfilled with argon for three cycles. The  $\text{NEt}_3$  (4.8 mL) was added under argon, then

phenylacetylene (0.22 mL, 2 mmol, 1 eq.) was added dropwise at room temperature. The reaction mixture was stirred at room temperature for 2 h, at the end of which the reaction mixture is partitioned in EtOAc and distilled water (10 mL each). The combined organic layers were washed with brine, and then dried over Na<sub>2</sub>SO<sub>4</sub>. After filtration, the solvents were removed under reduced pressure to give the crude product. The crude product is purified by silica gel column chromatography (petroleum ether) to give 345.6 mg title product as a white oil. 90% yield.

**<sup>1</sup>H NMR (400 MHz, CDCl<sub>3</sub>)** δ 7.59 – 7.47 (m, 3H), 7.39 – 7.29 (m, 3H), 7.23 (d, J = 4.5 Hz, 2H), 7.16 (dt, J = 8.6, 4.5 Hz, 1H), 2.52 (d, J = 1.5 Hz, 3H).

**<sup>13</sup>C NMR (101 MHz, CDCl<sub>3</sub>)** δ 140.23, 131.87, 131.56, 129.52, 128.41, 128.36, 128.23, 125.64, 123.56, 123.03, 93.39, 88.38, 20.84.

**HRMS (ESI) *m/z* ([M+H]<sup>+</sup>)** Calcd for C<sub>15</sub>H<sub>13</sub>: 193.1017; Found: 193.1014.

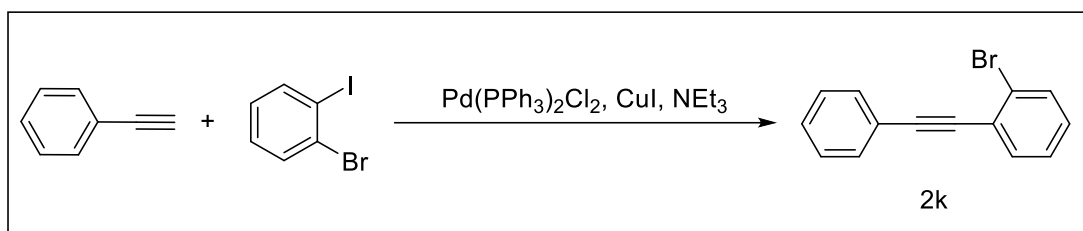

#### 1-bromo-2-(phenylethynyl)benzene(2k)

1-bromo-2-iodobenzene (0.25 mL, 2 mmol), Pd(PPh<sub>3</sub>)<sub>2</sub>Cl<sub>2</sub> (28.6 mg, 0.04 mmol, 2 mol%) and CuI (15.2 mg, 0.08 mmol, 4 mol%) was placed into a Schlenk tube equipped with a stir bar. The tube was vacuumed and backfilled with argon for three cycles. The NEt<sub>3</sub> (4.8 mL) was added under argon, then phenylacetylene (0.22 mL, 2 mmol, 1 eq.) was added dropwise at room temperature. The reaction mixture was stirred at room temperature for 2 h, at the end of which the reaction mixture was partitioned in EtOAc and distilled water (10 mL each). The combined organic layers were washed with brine, and then dried over Na<sub>2</sub>SO<sub>4</sub>. After filtration, the solvents were removed under reduced pressure to give the crude product. The crude product is purified by silica gel column chromatography (petroleum ether) to give 488.5 mg title product as a white oil. 95% yield.

**<sup>1</sup>H NMR (400 MHz, CDCl<sub>3</sub>)** δ 7.63 – 7.53 (m, 4H), 7.35 (dd, J = 4.7, 2.0 Hz, 3H), 7.27 (td, J = 7.6, 1.2 Hz, 1H), 7.16 (td, J = 7.8, 1.7 Hz, 1H).

**<sup>13</sup>C NMR (101 MHz, CDCl<sub>3</sub>)** δ 133.27, 132.49, 131.75, 129.45, 128.71, 128.44, 127.09, 125.68, 125.40, 122.91, 93.96, 88.07.

**HRMS (EI) *m/z* (M<sup>+</sup>)** Calcd for C<sub>14</sub>H<sub>9</sub>Br: 255.9888; Found: 255.98851.

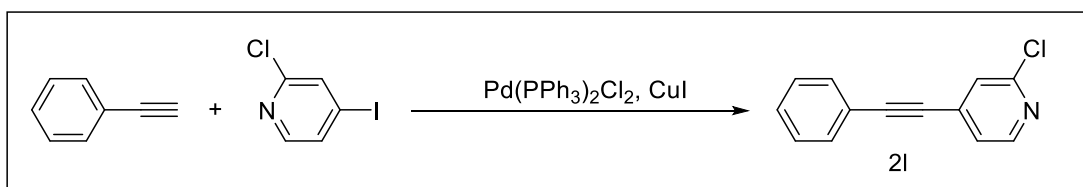

#### 2-chloro-4-(phenylethynyl)pyridine(2l)

2-chloro-4-iodopyridine (0.4789 g, 2 mmol), Pd(PPh<sub>3</sub>)<sub>2</sub>Cl<sub>2</sub> (28.6 mg, 0.04 mmol, 2 mol%) and CuI (15.2 mg, 0.08 mmol, 4 mol%) were placed into a Schlenk tube equipped with a stir bar. The tube was vacuumed and backfilled with argon for three cycles. The NEt<sub>3</sub> (4.8 mL) was added under argon, then phenylacetylene (0.22 mL, 2 mmol, 1 eq.) was added dropwise at room temperature. The reaction mixture



was stirred at room temperature for 2 h, at the end of which the reaction mixture was partitioned in EtOAc and distilled water (10 mL each). The combined organic layers were washed with brine, and then dried over Na<sub>2</sub>SO<sub>4</sub>. After filtration, the solvents were removed under reduced pressure to give the crude product. The crude product is purified by silica gel column chromatography (petroleum ether) to give 312.8 mg title product as a white oil. 73% yield.

**<sup>1</sup>H NMR (400 MHz, CDCl<sub>3</sub>)** δ 8.54 (d, J = 2.3 Hz, 1H), 7.76 (dd, J = 8.3, 2.3 Hz, 1H), 7.57 – 7.51 (m, 2H), 7.41 – 7.35 (m, 3H), 7.33 (dd, J = 8.3, 0.7 Hz, 1H).

**<sup>13</sup>C NMR (101 MHz, CDCl<sub>3</sub>)** δ 152.04, 150.39, 140.93, 131.70, 129.07, 128.52, 123.94, 122.16, 119.39, 93.76, 84.68.

**HRMS (ESI) m/z ([M+H]<sup>+</sup>)** Calcd for C<sub>13</sub>H<sub>9</sub>ClN: 214.0424; Found:214.0424.

## 2.2 Preparation and characterization of 4,5-diaryl pyrene

### General Procedure B:

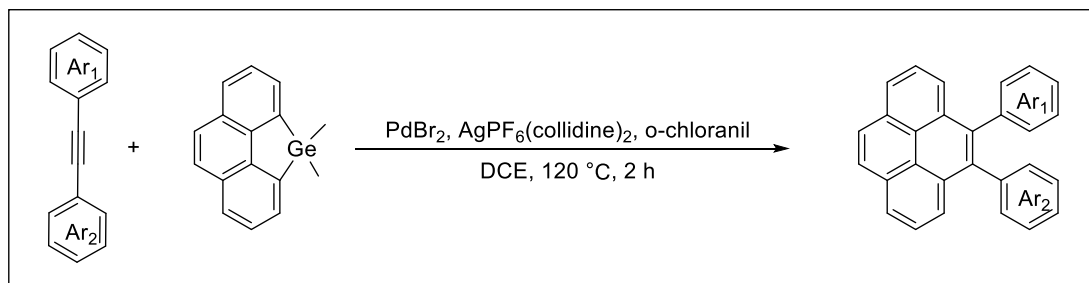

4,4-dimethyl-4H-phenanthro[4,5-bcd]germole (0.0418g, 0.15 mmol, 1.5 eq.)、Diarylacetylene (0.1 mmol)、PdBr<sub>2</sub> (0.0014g, 0.5 umol, 5 mol%)、AgPF<sub>6</sub>(collidine)<sub>2</sub> (0.0050g, 1 umol, 10 mol%) and o-chloranil (0.0507g, 0.2 mmol, 2 eq.) were placed into a Schlenk tube equipped with a stir bar. The tube was vacuumed and backfilled with argon for three cycles. Then, DCE(0.5 mL) was added. The reaction mixture was stirred at 120°C for 2 h before being quenched with water. The reaction mixture was extracted with EtOAc. The combined organic layers were washed with brine, and then dried over Na<sub>2</sub>SO<sub>4</sub>. After filtration, the solvents were removed under reduced pressure to give the crude product. The purification by flash column chromatography on silica gel.

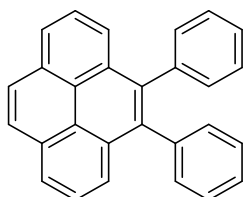

### 4,5-diphenylpyrene(3a)

According to General Procedure B, using 1,2-diphenylethyne, the title compound was isolated by silica gel column chromatography using petroleum ether as eluent in 78% yield, 27.5 mg, white solid.

**<sup>1</sup>H NMR (400 MHz, CDCl<sub>3</sub>)** δ 8.20 (dd, J = 7.5, 1.2 Hz, 2H), 8.14 (s, 2H), 7.91 (t, J = 7.7 Hz, 2H), 7.84 (dd, J = 7.9, 1.2 Hz, 2H), 7.32 – 7.21 (m, 10H).

**<sup>13</sup>C NMR (126 MHz, CDCl<sub>3</sub>)** δ 139.50, 137.77, 131.37, 131.13, 127.68, 127.41, 126.60, 125.86, 125.05, 124.86, 124.22.

**HRMS (ESI) m/z ([M+H]<sup>+</sup>)** Calcd for C<sub>28</sub>H<sub>19</sub>: 355.1487; Found:355.1473.

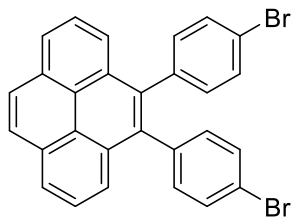

#### 4,5-bis(4-bromophenyl)pyrene(3b)

According to General Procedure B, using 1,2-bis(4-bromophenyl)ethyne, the title compound was isolated by silica gel column chromatography using petroleum ether as eluent in 87% yield, 44.5 mg, white solid.

**<sup>1</sup>H NMR (400 MHz, CDCl<sub>3</sub>)** δ 8.21 (dd, J = 7.6, 1.1 Hz, 2H), 8.13 (s, 2H), 7.91 (t, J = 7.7 Hz, 2H), 7.76 (dd, J = 7.9, 1.1 Hz, 2H), 7.52 – 7.43 (m, 4H), 7.16 – 7.09 (m, 4H).

**<sup>13</sup>C NMR (101 MHz, CDCl<sub>3</sub>)** δ 138.18, 136.63, 132.70, 131.23, 131.07, 130.88, 127.53, 126.06, 125.51, 124.65, 124.24, 121.12.

**HRMS (EI) m/z (M+•)** Calcd for C<sub>28</sub>H<sub>16</sub>Br<sub>2</sub>: 509.9619; Found:509.96168.

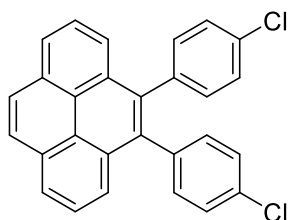

#### 4,5-bis(4-chlorophenyl)pyrene(3c)

According to General Procedure B, using 1,2-bis(4-chlorophenyl)ethyne at 100 °C for 12 h, the title compound was isolated by silica gel column chromatography using petroleum ether as eluent in 99% yield, 42.1 mg, yellow solid.

**<sup>1</sup>H NMR (400 MHz, CDCl<sub>3</sub>)** δ 8.22 (dd, J = 7.7, 1.1 Hz, 2H), 8.14 (s, 2H), 7.91 (t, J = 7.8 Hz, 2H), 7.77 (dd, J = 7.9, 1.1 Hz, 2H), 7.30 (d, J = 8.4 Hz, 4H), 7.21 – 7.14 (m, 4H).

**<sup>13</sup>C NMR (101 MHz, CDCl<sub>3</sub>)** δ 137.73, 136.74, 132.86, 132.36, 131.08, 130.97, 128.27, 127.53, 126.05, 125.48, 124.65, 124.25.

**HRMS (EI) m/z (M+•)** Calcd for C<sub>28</sub>H<sub>16</sub>Cl<sub>2</sub>: 422.0629; Found:422.06243.

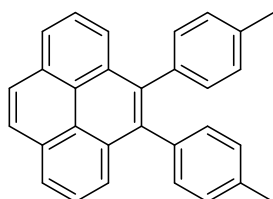

#### 4,5-di-p-tolylpyrene(3d)

According to General Procedure B, using 1,2-di-p-tolyne, the title compound was isolated by silica gel column chromatography using petroleum ether as eluent in 78% yield, 29.9 mg, white solid.

**<sup>1</sup>H NMR (400 MHz, CDCl<sub>3</sub>)** δ 8.16 (dd, J = 7.3, 1.3 Hz, 2H), 8.10 (s, 2H), 7.92 – 7.78 (m, 4H), 7.14 (dd, J = 8.0, 1.8 Hz, 4H), 7.09 (dd, J = 7.9, 1.7 Hz, 4H), 2.34 (s, 6H).

**<sup>13</sup>C NMR (101 MHz, CDCl<sub>3</sub>)** δ 137.79, 136.61, 135.97, 131.71, 131.03, 131.00, 128.49, 127.42, 125.83, 124.93 (d, J = 2.2 Hz), 124.22, 21.38.

**HRMS (ESI) m/z ([M+H]<sup>+</sup>)** Calcd for C<sub>30</sub>H<sub>23</sub>: 383.1800; Found:383.1816.

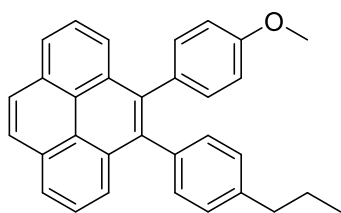

#### 4-(4-methoxyphenyl)-5-(4-propylphenyl)pyrene(3e)

According to General Procedure B, using 1-methoxy-4-((4-propylphenyl)ethynyl)benzene, the title compound was isolated by silica gel column chromatography using petroleum ether as eluent in 88% yield, 37.8 mg, yellow solid.

**<sup>1</sup>H NMR (400 MHz, CDCl<sub>3</sub>)** δ 8.22 – 8.17 (m, 2H), 8.14 (s, 2H), 7.94 – 7.86 (m, 4H), 7.20 – 7.13 (m, 4H), 7.10 (d, J = 7.9 Hz, 2H), 6.87 – 6.80 (m, 2H), 3.81 (s, 3H), 2.60 (t, J = 7.6 Hz, 2H), 1.67 (q, J = 7.4 Hz, 2H), 0.93 (t, J = 7.3 Hz, 3H).

**<sup>13</sup>C NMR (101 MHz, CDCl<sub>3</sub>)** δ 158.06, 140.68, 138.17, 137.45, 136.86, 132.23, 131.92, 131.77, 131.62, 131.01, 130.94, 127.83, 127.41, 127.39, 125.81, 124.95, 124.91, 124.83, 124.23, 113.11, 55.20, 37.72, 24.39, 13.72.

**HRMS (EI) m/z (M<sup>+</sup>)** Calcd for C<sub>32</sub>H<sub>26</sub>O: 426.1984; Found: 426.19792.

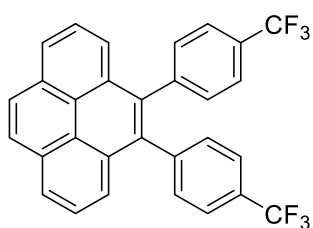

#### 4,5-bis(4-(trifluoromethyl)phenyl)pyrene(3f)

According to General Procedure B, using 1,2-bis(4-(trifluoromethyl)phenyl)ethyne, the title compound was isolated by silica gel column chromatography using petroleum ether as eluent in 79% yield, 38.6 mg, white solid.

**<sup>1</sup>H NMR (400 MHz, CDCl<sub>3</sub>)** δ 8.26 (dd, J = 7.6, 1.1 Hz, 2H), 8.17 (s, 2H), 7.95 (t, J = 7.8 Hz, 2H), 7.73 (dd, J = 8.0, 1.1 Hz, 2H), 7.59 (d, J = 7.9 Hz, 4H), 7.38 (d, J = 7.9 Hz, 4H).

**<sup>13</sup>C NMR (101 MHz, CDCl<sub>3</sub>)** δ 142.93, 136.56, 131.39, 131.13, 130.57, 129.26 (q, J = 32 Hz), 127.61, 126.20, 125.79, 125.00 (q, J = 4 Hz), 124.60, 124.15 (q, J = 271 Hz), 124.31.

**<sup>19</sup>F NMR (471 MHz, CDCl<sub>3</sub>)** δ -62.46.

**HRMS (EI) m/z (M<sup>+</sup>)** Calcd for C<sub>30</sub>H<sub>16</sub>F<sub>6</sub>: 490.1156; Found: 490.11502.

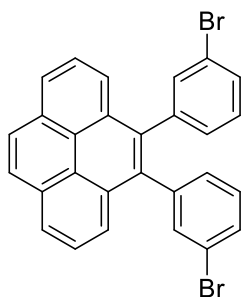

#### 4,5-bis(3-bromophenyl)pyrene(3g)

According to General Procedure B, using 1,2-bis(3-bromophenyl)ethyne, the title compound was isolated by silica gel column chromatography using petroleum ether as eluent in 42% yield, 21.3 mg, white solid.

**<sup>1</sup>H NMR (400 MHz, CDCl<sub>3</sub>)** δ 8.23 (dd, J = 7.6, 1.1 Hz, 2H), 8.14 (s, 2H), 7.94 (t, J = 7.8 Hz, 2H), 7.80 (d, J = 7.9 Hz, 2H), 7.53 – 7.39 (m, 4H), 7.28 – 7.15 (m, 4H).

**<sup>13</sup>C NMR (101 MHz, CDCl<sub>3</sub>)** δ 141.24, 141.21, 136.53, 133.97, 133.80, 131.06, 130.70, 130.12, 129.79, 129.67, 129.62, 129.43, 127.54, 126.13, 125.60, 124.73, 124.25, 122.09, 121.94.

**HRMS (EI) m/z (M<sup>+</sup>)** Calcd for C<sub>28</sub>H<sub>16</sub>Br<sub>2</sub>: 509.9619; Found:509.96155.

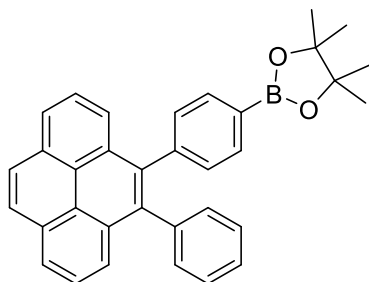

#### 4,4,5,5-tetramethyl-2-(4-(5-phenylpyren-4-yl)phenyl)-1,3,2-dioxaborolane(3h)

According to General Procedure B, using 4,4,5,5-tetramethyl-2-(4-(phenylethynyl)phenyl)-1,3,2-dioxaborolane, the title compound was isolated by silica gel column chromatography using petroleum ether as eluent in 49% yield, 23.3 mg, white solid.

**<sup>1</sup>H NMR (400 MHz, CDCl<sub>3</sub>)** δ 8.19 (ddd, J = 7.5, 3.4, 1.1 Hz, 2H), 8.12 (s, 2H), 7.96 – 7.72 (m, 6H), 7.37 – 7.25 (m, 7H), 1.36 (s, 12H).

**<sup>13</sup>C NMR (101 MHz, CDCl<sub>3</sub>)** δ 142.66, 139.35, 137.63, 137.56, 134.18, 131.41, 131.25, 131.11, 131.01, 130.60, 127.84, 127.44, 127.43, 126.72, 125.89, 125.11, 125.09, 124.91, 124.89, 124.24, 124.21, 83.82, 24.99.

**<sup>11</sup>B NMR (160 MHz, CDCl<sub>3</sub>)** δ 30.36.

**HRMS (ESI) m/z ([M+H]<sup>+</sup>)** Calcd for C<sub>34</sub>H<sub>30</sub>BO<sub>2</sub>: 481.2339; Found:481.2347.

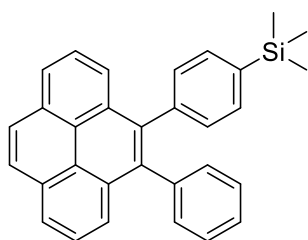

#### trimethyl(4-(5-phenylpyren-4-yl)phenyl)silane(3i)

According to General Procedure B, using trimethyl(4-(phenylethynyl)phenyl)silane, the title compound was isolated by silica gel column chromatography using petroleum ether as eluent in 76% yield, 32.3 mg, white solid.

**<sup>1</sup>H NMR (400 MHz, CDCl<sub>3</sub>)** δ 8.17 (dd, J = 7.4, 1.4 Hz, 2H), 8.11 (s, 2H), 7.93 – 7.79 (m, 4H), 7.46 – 7.37 (m, 2H), 7.33 – 7.17 (m, 7H), 0.32 – 0.22 (m, 9H).

**<sup>13</sup>C NMR (101 MHz, CDCl<sub>3</sub>)** δ 140.85, 140.48, 139.31, 138.77, 138.67, 133.62, 132.42, 132.39, 132.16, 132.02, 131.43, 128.70, 128.43, 127.56, 126.87, 126.06, 125.99, 125.88, 125.24, 0.00.

**HRMS (ESI) m/z ([M+H]<sup>+</sup>)** Calcd for C<sub>31</sub>H<sub>27</sub>Si: 427.1882; Found:427.1892.

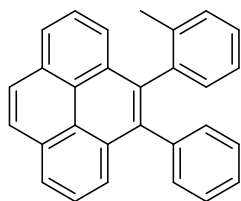

#### 4-phenyl-5-(o-tolyl)pyrene(3j)

According to General Procedure B, using 1-methyl-2-(phenylethynyl)benzene at 100°C for 12 h, the title compound was isolated by silica gel column chromatography using petroleum ether as eluent in 65% yield, 24.0 mg, white solid.

**<sup>1</sup>H NMR (400 MHz, CDCl<sub>3</sub>)** δ 8.19 (ddd, J = 7.7, 4.0, 1.1 Hz, 2H), 8.13 (s, 2H), 7.92 – 7.87 (m, 2H), 7.84 (ddd, J = 8.0, 6.2, 1.1 Hz, 1H), 7.64 (dt, J = 7.9, 1.4 Hz, 1H), 7.33 – 7.23 (m, 5H), 7.19 – 7.09 (m, 4H), 2.00 (d, J = 1.2 Hz, 3H).

**<sup>13</sup>C NMR (101 MHz, CDCl<sub>3</sub>)** δ 139.47, 138.94, 137.54, 137.20, 136.81, 131.57, 131.49, 131.37, 131.15, 131.05, 130.86, 129.62, 129.43, 127.78, 127.65, 127.48, 127.45, 127.24, 126.82, 126.14, 125.87, 125.24, 125.13, 125.10, 124.83, 124.39, 124.34, 20.16.

**HRMS (ESI) *m/z* ([M+Na]<sup>+</sup>)** Calcd for C<sub>29</sub>H<sub>2</sub>Na: 391.1463; Found:391.1457.

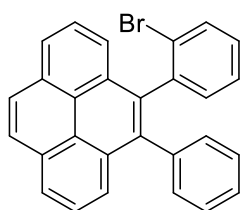

#### 4-(2-bromophenyl)-5-phenylpyrene(3k)

According to General Procedure B, using 1-bromo-2-(phenylethynyl)benzene, the title compound was isolated by silica gel column chromatography using petroleum ether as eluent in 68% yield, 29.3 mg, white solid.

**<sup>1</sup>H NMR (400 MHz, CDCl<sub>3</sub>)** δ 8.21 (dt, J = 7.7, 1.7 Hz, 2H), 8.13 (s, 2H), 7.91 (td, J = 7.7, 5.6 Hz, 2H), 7.84 (d, J = 8.4 Hz, 1H), 7.63 (d, J = 7.9 Hz, 1H), 7.59 (d, J = 8.0 Hz, 2H), 7.50 (dd, J = 7.7, 1.9 Hz, 2H), 7.34 – 7.25 (m, 4H), 7.22 (d, J = 4.6 Hz, 2H), 7.12 (dt, J = 8.7, 4.7 Hz, 1H).

**<sup>13</sup>C NMR (101 MHz, CDCl<sub>3</sub>)** δ 140.54, 139.13, 137.88, 136.71, 133.00, 132.38, 131.39, 131.20, 131.10, 130.85, 130.16, 129.68, 128.76, 128.08, 127.54, 127.50, 127.46, 127.04, 126.99, 126.17, 125.92, 125.42, 125.26, 125.19, 125.05, 124.52, 124.17.

**HRMS (ESI) *m/z* ([M+H]<sup>+</sup>)** Calcd for C<sub>28</sub>H<sub>18</sub>Br: 433.0592; Found:433.0605.

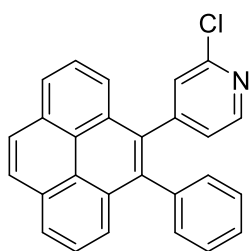

#### 2-chloro-4-(5-phenylpyren-4-yl)pyridine(3l)

According to General Procedure B, using 2-chloro-4-(phenylethynyl)pyridine, the title compound was

isolated by silica gel column chromatography using petroleum ether as eluent in 74% yield, 32.4 mg, white solid.

**<sup>1</sup>H NMR (400 MHz, CDCl<sub>3</sub>)** δ 8.30 (d, J = 2.4 Hz, 1H), 8.22 (dd, J = 7.6, 1.1 Hz, 2H), 8.13 (s, 2H), 7.91 (td, J = 7.7, 5.6 Hz, 2H), 7.81 (dd, J = 8.0, 1.1 Hz, 1H), 7.70 (dd, J = 7.9, 1.0 Hz, 1H), 7.52 (dd, J = 8.1, 2.4 Hz, 1H), 7.32 (td, J = 8.2, 6.5, 4.0, 2.0 Hz, 3H), 7.25 – 7.17 (m, 3H).

**<sup>13</sup>C NMR (101 MHz, CDCl<sub>3</sub>)** δ 151.49, 149.75, 141.31, 139.35, 138.57, 134.40, 132.49, 131.21, 131.18, 131.06, 131.04, 130.96, 130.74, 128.50, 128.08, 127.69, 127.62, 127.47, 127.33, 126.19, 126.14, 125.84, 125.58, 125.21, 124.44, 124.21, 123.93, 123.54.

**HRMS (ESI) m/z ([M+H]<sup>+</sup>)** Calcd for C<sub>27</sub>H<sub>17</sub>ClN : 390.1050 ; Found:390.1055.

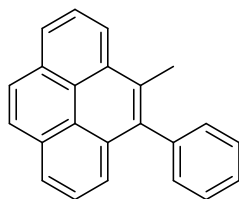

#### 4-methyl-5-phenylpyrene(3m)

According to General Procedure B, using prop-1-yn-1-ylbenzene at 100°C for 12 h, the title compound was isolated by silica gel column chromatography using petroleum ether as eluent in 37% yield, 10.9 mg, white solid.

**<sup>1</sup>H NMR (400 MHz, CDCl<sub>3</sub>)** δ 8.41 (dd, J = 7.9, 1.1 Hz, 1H), 8.23 (dd, J = 7.7, 1.0 Hz, 1H), 8.22 – 8.02 (m, 4H), 7.85 (td, J = 7.8, 1.2 Hz, 1H), 7.65 (dq, J = 8.0, 1.1 Hz, 1H), 7.62 – 7.53 (m, 2H), 7.55 – 7.46 (m, 1H), 7.47 – 7.37 (m, 2H), 2.63 (s, 3H).

**<sup>13</sup>C NMR (101 MHz, CDCl<sub>3</sub>)** δ 140.63, 137.62, 131.76, 131.34, 131.31, 130.84, 130.61, 130.50, 128.51, 127.40, 127.36, 127.19, 125.96, 125.68, 125.02, 124.62, 124.50, 124.21, 123.52, 122.02, 17.40.

**HRMS (ESI) m/z ([M+H]<sup>+</sup>)** Calcd for C<sub>23</sub>H<sub>17</sub>: 293.1330; Found:293.1324.

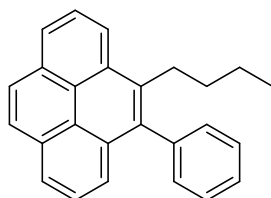

#### 4-butyl-5-phenylpyrene(3n)

According to General Procedure B, using hex-1-yn-1-ylbenzene at 100°C for 12 h, the title compound was isolated by silica gel column chromatography using petroleum ether as eluent in 48% yield, 16.1 mg, white solid.

**<sup>1</sup>H NMR (400 MHz, CDCl<sub>3</sub>)** δ 8.43 (dt, J = 8.0, 1.3 Hz, 1H), 8.21 (d, J = 7.6 Hz, 1H), 8.17 – 8.00 (m, 4H), 7.83 (td, J = 7.8, 1.7 Hz, 1H), 7.62 – 7.50 (m, 3H), 7.55 – 7.46 (m, 1H), 7.45 – 7.36 (m, 2H), 3.08 – 2.98 (m, 2H), 1.70 (qdd, J = 7.9, 6.2, 5.4, 1.9 Hz, 2H), 1.36 (hd, J = 7.3, 2.0 Hz, 2H), 0.84 (td, J = 7.3, 2.3 Hz, 3H).

**<sup>13</sup>C NMR (101 MHz, CDCl<sub>3</sub>)** δ 140.42, 137.39, 135.63, 131.94, 131.53, 130.84, 130.35, 128.43, 127.43, 127.34, 127.18, 125.90, 125.65, 124.91, 124.69, 124.66, 124.43, 123.54, 122.21, 33.11, 30.41, 23.29, 13.84.

**HRMS (ESI) m/z ([M+H]<sup>+</sup>)** Calcd for C<sub>26</sub>H<sub>13</sub>: 335.1800; Found:335.1783.

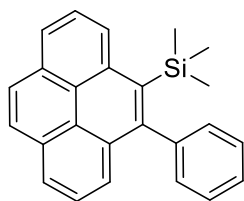

#### trimethyl(5-phenylpyren-4-yl)silane(3o)

According to General Procedure B, using trimethyl(phenylethynyl)silane at 100 °C for 12 h, the title compound was isolated by silica gel column chromatography using petroleum ether as eluent in 48% yield, 16.9 mg, white solid.

**<sup>1</sup>H NMR (400 MHz, CDCl<sub>3</sub>)** δ 8.63 (dd, J = 8.0, 1.0 Hz, 1H), 8.20 (dd, J = 7.6, 1.0 Hz, 1H), 8.16 (dd, J = 7.6, 1.1 Hz, 1H), 8.13 – 8.06 (m, 2H), 8.04 (t, J = 7.8 Hz, 1H), 7.84 (t, J = 7.8 Hz, 1H), 7.67 (dd, J = 8.0, 1.1 Hz, 1H), 7.53 (dd, J = 5.2, 1.9 Hz, 3H), 7.48 (dt, J = 6.4, 2.2 Hz, 2H), 0.20 (s, 9H).

**<sup>13</sup>C NMR (101 MHz, CDCl<sub>3</sub>)** δ 147.59, 142.49, 135.20, 134.00, 131.51, 131.44, 130.79, 128.05, 127.62, 127.01, 126.65, 125.55, 125.46, 125.04, 124.80, 124.68, 124.38, 2.74.

**HRMS (EI) m/z (M<sup>+</sup>)** Calcd for C<sub>25</sub>H<sub>22</sub>Si: 350.1491; Found:350.14798.

## 2.3 Preparation and characterization of phenangermoles

### General Procedure C:

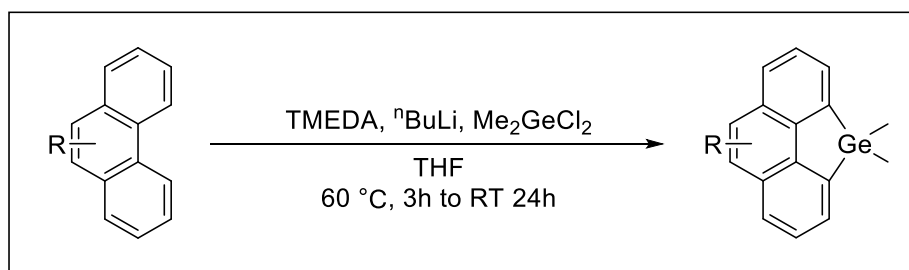

Derivative of phenanthrene (2 mmol) and TMEDA (0.72 mL, 4.8 mmol 2.4 eq.) were placed into a Schlenk tube equipped with a stir bar. The tube was vacuumed and backfilled with argon for three cycles. Then, a solution of n-BuLi (2.4 M in Hexane, 1.84 mL, 4.4 mmol, 2.2 eq.) was added dropwise at 0 °C. After stirring at 60 °C for 3 h,<sup>3</sup> dry THF (4.8 mL) was added, dichlorodimethylgermane (0.4 mL, 3.4 mmol, 1.7 eq.) was added at –78 °C. The reaction mixture was stirred at room temperature for 24 h before being quenched with water. The reaction mixture was extracted with EtOAc. The combined organic layers were washed with brine, and then dried over Na<sub>2</sub>SO<sub>4</sub>. After filtration, the solvents were removed under reduced pressure to give the crude product. The purification by flash column chromatography on silica gel.

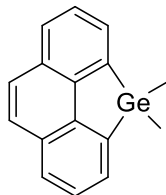

#### 4,4-dimethyl-4H-phenanthro[4,5-bcd]germole (1a)

According to General Procedure C, using phenanthrene, the title compound was isolated by silica gel column chromatography using petroleum ether as eluent in 30% yield, 167.4 mg, white solid.

**<sup>1</sup>H NMR (400 MHz, CDCl<sub>3</sub>)** δ 7.90 – 7.86 (m, 4H), 7.77 (s, 2H), 7.63 (dd, *J* = 7.9, 6.8 Hz, 2H), 0.73 (s, 6H).  
**<sup>13</sup>C NMR (101 MHz, CDCl<sub>3</sub>)** δ 142.82, 142.47, 132.45, 132.22, 129.44, 129.09, 128.78, 128.44, 0.00.  
**HRMS (EI) *m/z* (M<sup>+</sup>)** Calcd for C<sub>16</sub>H<sub>14</sub>Ge: 280.0307; Found:280.02992.

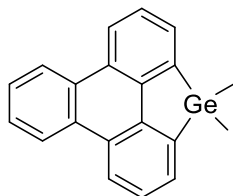

#### 4,4-dimethyl-4H-triphenyleno[1,12-bcd]germole(1b)

According to General Procedure C, using triphenylene, the title compound was isolated by silica gel column chromatography using petroleum ether as eluent in 51% yield, 337.9 mg, white solid.

**<sup>1</sup>H NMR (400 MHz, CDCl<sub>3</sub>)** δ 8.70 – 8.64 (m, 2H), 8.56 (dd, *J* = 8.2, 1.0 Hz, 2H), 7.88 (dd, *J* = 6.8, 1.0 Hz, 2H), 7.71 – 7.64 (m, 4H), 0.73 (s, 6H).  
**<sup>13</sup>C NMR (101 MHz, CDCl<sub>3</sub>)** δ 142.84, 142.28, 133.49, 132.51, 130.57, 129.59, 129.34, 125.76, 125.20, 2.34.

**HRMS (EI) *m/z* (M<sup>+</sup>)** Calcd for C<sub>20</sub>H<sub>16</sub>Ge: 330.0464; Found:330.04562.

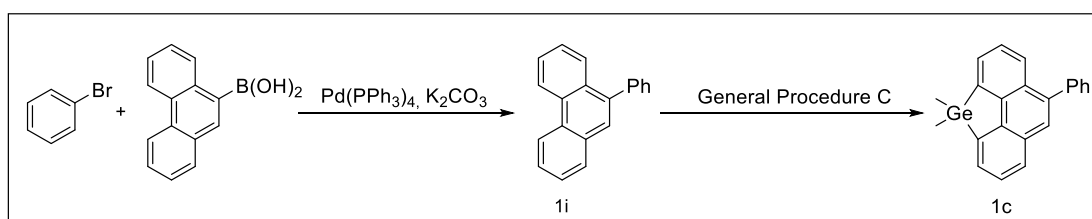

9-Phenanthracenylboronic acid (0.5329 g, 2.4 mmol, 1.2 eq.), Pd(PPh<sub>3</sub>)<sub>4</sub> (0.0924 g, 0.08 mmol, 4 mol%) and K<sub>2</sub>CO<sub>3</sub> (0.6634 g, 4.8 mmol, 2.4 eq.) were placed into a Schlenk tube equipped with a stir bar. The tube was vacuumed and backfilled with argon for three cycles. The dry THF (20 mL) was added under argon, then bromobenzene (0.21 mL, 2 mmol, 1 eq.) was added dropwise. The reaction mixture was refluxed for 24 h, at the end of which the reaction mixture is partitioned in EtOAc and distilled water (10 mL each). The combined organic layers were washed with brine, and then dried over Na<sub>2</sub>SO<sub>4</sub>. After filtration, the solvents were removed under reduced pressure to give the crude product. The crude product is purified by silica gel column chromatography (petroleum ether) to give 278.7 mg title product as a white oil. 55% yield.

According general procedure C to get compound 1c.

#### 9-phenylphenanthrene(1i)

**<sup>1</sup>H NMR (400 MHz, CDCl<sub>3</sub>)** δ 8.83 (d, *J* = 8.3 Hz, 1H), 8.78 (d, *J* = 8.1 Hz, 1H), 8.00 (dd, *J* = 8.2, 1.3 Hz, 1H), 7.95 (dd, *J* = 7.7, 1.5 Hz, 1H), 7.78 – 7.65 (m, 4H), 7.64 – 7.49 (m, 6H).  
**<sup>13</sup>C NMR (101 MHz, CDCl<sub>3</sub>)** δ 140.87, 138.84, 131.63, 131.20, 130.70, 130.15, 130.03, 128.75, 128.40, 127.61, 127.45, 127.01, 126.93, 126.67, 126.59, 126.54, 122.99, 122.62, 77.34.  
**HRMS (EI) *m/z* (M<sup>+</sup>)** Calcd for C<sub>20</sub>H<sub>14</sub>: 254.1096; Found: 254.10904 .

#### 4,4-dimethyl-8-phenyl-4H-phenanthro[4,5-bcd]germole(1c)



According to General Procedure C, using 9-phenylphenanthrene, the title compound was isolated by silica gel column chromatography using petroleum ether as eluent in 22% yield, 155.9 mg, white oil.

**<sup>1</sup>H NMR (400 MHz, CDCl<sub>3</sub>)** δ 7.90 (dd, J = 8.2, 1.0 Hz, 1H), 7.88 – 7.84 (m, 3H), 7.70 (s, 1H), 7.64 – 7.61 (m, 1H), 7.57 (ddd, J = 9.1, 7.4, 1.5 Hz, 3H), 7.52 – 7.47 (m, 2H), 7.46 – 7.41 (m, 1H), 0.73 (s, 6H).

**<sup>13</sup>C NMR (101 MHz, CDCl<sub>3</sub>)** δ 143.06, 142.80, 142.78, 142.52, 142.10, 141.07, 132.54, 132.43, 132.20, 131.85, 131.37, 130.53, 129.54, 129.53, 129.34, 129.08, 128.88, 128.15, 0.00.

**HRMS (EI) m/z (M<sup>+</sup>)** Calcd for C<sub>22</sub>H<sub>18</sub>Ge: 356.0620; Found: 356.06132.

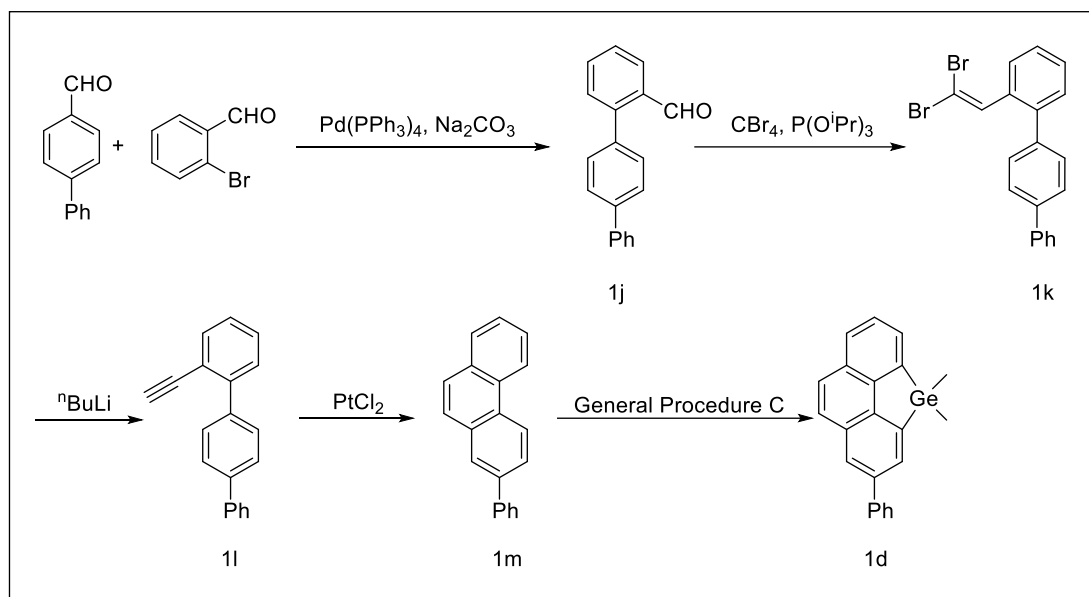

4-Biphenylboronic acid (0.9902 g, 5 mmol, 1 eq.), Pd(PPh<sub>3</sub>)<sub>4</sub> (0.3178 g, 0.275 mmol, 5.5 mol%) and Na<sub>2</sub>CO<sub>3</sub> (5.2995 g, 50 mmol, 10 eq.) were placed into a Schlenk tube equipped with a stir bar. The tube was vacuumed and backfilled with argon for three cycles. The toluene/EtOH/H<sub>2</sub>O (25/25/25 mL) was added under argon, then 2-bromobenzaldehyde (0.58 mL, 1 eq.) was added dropwise. The reaction mixture was stirred at 80 °C for 3 h, at the end of which the reaction mixture is partitioned in EtOAc and distilled water (10 mL each). The combined organic layers were washed with brine, and then dried over Na<sub>2</sub>SO<sub>4</sub>. After filtration, the solvents were removed under reduced pressure to give the crude product. The crude product is purified by silica gel column chromatography to give 1.172 g title product as a white oil. 91% yield.

Cool a solution of the above compound (1.0667 g, 4.13 mmol, 1 eq.) and CBr<sub>4</sub> (2.7952 g, 8.26 mmol, 2 eq.) in DCM (30 mL) to 0 °C. Add P(Oi-Pr)<sub>3</sub> (4 mL, 16.52 mmol, 4 eq.) dropwise. The mixture was stirred for 2.5 h and warmed to RT,<sup>4</sup> at the end of which the reaction mixture was partitioned in EtOAc and distilled water (10 mL each). The combined organic layers were washed with brine, and then dried over Na<sub>2</sub>SO<sub>4</sub>. After filtration, the solvents were removed under reduced pressure to give the crude product. The crude product is purified by silica gel column chromatography to give 1.4419 g title product as a white solid. 85% yield.

The above compound (1.4129 g, 3.4 mmol, 1 eq.) was dissolved in dry THF (23 mL) and cooled to -78 °C. n-BuLi (5.7 mL, 2.4 M in Hexane, 13.6 mmol, 4 eq.) was added dropwise. The mixture was stirred under nitrogen for 6 h. The cold solution was quenched with H<sub>2</sub>O dropwise and warmed to RT. The solution was extracted with MTBE. The combined organic layers were washed with brine, and then dried over Na<sub>2</sub>SO<sub>4</sub>. After filtration, the solvents were removed under reduced pressure to

give the crude product. The crude product is purified by silica gel column chromatography to give 605.31 mg title product as a white oil. 70% yield.

The above compound (0.6060 g, 2.38 mmol, 1 eq.) and  $\text{PtCl}_2$  (0.0505 g, 0.19 mmol, 8 mol%) were placed into a Schlenk tube equipped with a stir bar. The tube was vacuumed and backfilled with argon for three cycles. the DCE (14 mL) was added under argon. The reaction mixture was stirred at 100°C for 24 h, at the end of which the reaction mixture is partitioned in  $\text{CH}_2\text{Cl}_2$  and distilled water (10 mL each). The combined organic layers were washed with brine, and then dried over  $\text{Na}_2\text{SO}_4$ . After filtration, the solvents were removed under reduced pressure to give the crude product. The crude product is purified by silica gel column chromatography to give 473.7 mg title product as a white solid. 78% yield.

According general procedure C to get compound 1d.

#### **[1,1':4',1''-terphenyl]-2-carbaldehyde(1j)**

$^1\text{H}$  NMR (400 MHz,  $\text{CDCl}_3$ )  $\delta$  10.07 (d,  $J$  = 0.7 Hz, 1H), 8.06 (dt,  $J$  = 7.6, 1.2 Hz, 1H), 7.73 – 7.68 (m, 2H), 7.68 – 7.64 (m, 3H), 7.55 – 7.45 (m, 6H), 7.42 – 7.37 (m, 1H).

$^{13}\text{C}$  NMR (101 MHz,  $\text{CDCl}_3$ )  $\delta$  192.48, 145.55, 141.06, 140.29, 136.65, 133.77, 133.64, 130.77, 130.58, 128.93, 127.84, 127.71, 127.69, 127.16.

HRMS (ESI)  $m/z$  ( $[\text{M}+\text{H}]^+$ ) Calcd for  $\text{C}_{19}\text{H}_{15}\text{O}$ : 259.1123; Found: 259.1122.

#### **2-(2,2-dibromovinyl)-1,1':4',1''-terphenyl(1k)**

$^1\text{H}$  NMR (400 MHz,  $\text{CDCl}_3$ )  $\delta$  7.80 – 7.63 (m, 5H), 7.53 – 7.34 (m, 8H), 7.28 (s, 1H).

$^{13}\text{C}$  NMR (101 MHz,  $\text{CDCl}_3$ )  $\delta$  139.56, 139.47, 139.27, 137.96, 136.49, 132.81, 128.92, 128.79, 128.32, 127.82, 127.69, 126.44, 126.15, 126.06, 125.93, 89.86.

HRMS (EI)  $m/z$  ( $\text{M}^+$ ) Calcd for  $\text{C}_{20}\text{H}_{14}\text{Br}_2$ : 411.9462; Found: 411.94601.

#### **2-ethynyl-1,1':4',1''-terphenyl(1l)**

$^1\text{H}$  NMR (400 MHz,  $\text{CDCl}_3$ )  $\delta$  7.68 – 7.62 (m, 7H), 7.48 – 7.41 (m, 4H), 7.38 – 7.29 (m, 2H), 3.08 (d,  $J$  = 1.0 Hz, 1H).

$^{13}\text{C}$  NMR (126 MHz,  $\text{CDCl}_3$ )  $\delta$  143.93, 140.78, 140.35, 139.17, 134.01, 129.66, 129.57, 129.06, 128.80, 127.37, 127.14, 127.07, 126.75, 120.40, 83.16, 80.36.

HRMS (EI)  $m/z$  ( $\text{M}^+$ ) Calcd for  $\text{C}_{20}\text{H}_{14}$ : 254.1096; Found: 254.10927.

#### **2-phenylphenanthrene(1m)**

$^1\text{H}$  NMR (400 MHz,  $\text{CDCl}_3$ )  $\delta$  8.76 (d,  $J$  = 8.7 Hz, 1H), 8.72 (d,  $J$  = 8.2 Hz, 1H), 8.11 (d,  $J$  = 2.0 Hz, 1H), 7.92 (ddd,  $J$  = 7.9, 4.6, 1.7 Hz, 2H), 7.84 – 7.76 (m, 4H), 7.68 (ddd,  $J$  = 8.3, 6.9, 1.6 Hz, 1H), 7.62 (ddd,  $J$  = 8.1, 6.9, 1.3 Hz, 1H), 7.52 (dd,  $J$  = 8.4, 7.0 Hz, 2H), 7.44 – 7.38 (m, 1H).

$^{13}\text{C}$  NMR (101 MHz,  $\text{CDCl}_3$ )  $\delta$  140.81, 139.24, 132.38, 132.07, 130.16, 129.43, 128.93, 128.63, 127.47, 127.39, 127.38, 127.12, 126.72, 126.61, 125.85, 123.28, 122.72.

HRMS (EI)  $m/z$  ( $\text{M}^+$ ) Calcd for  $\text{C}_{20}\text{H}_{14}$ : 254.1096; Found: 254.10870.

#### **4,4-dimethyl-2-phenyl-4H-phenanthro[4,5-bcd]germole (1d)**

According to General Procedure C, using 2-phenylphenanthrene, the title compound was isolated by silica gel column chromatography using petroleum ether as eluent in 20% yield, 144.2 mg, white oil.

$^1\text{H}$  NMR (400 MHz,  $\text{CDCl}_3$ )  $\delta$  8.10 (d,  $J$  = 1.7 Hz, 1H), 8.06 (d,  $J$  = 1.6 Hz, 1H), 7.87 (ddd,  $J$  = 6.9, 4.6,

1.0 Hz, 2H), 7.83 – 7.75 (m, 4H), 7.62 (dd,  $J = 7.9, 6.8$  Hz, 1H), 7.50 (dd,  $J = 8.4, 7.0$  Hz, 2H), 7.42 – 7.35 (m, 1H), 0.75 (s, 6H).

$^{13}\text{C}$  NMR (126 MHz,  $\text{CDCl}_3$ )  $\delta$  144.07, 143.15, 142.56, 142.49, 142.11, 141.95, 132.50, 132.22, 132.18, 131.90, 130.95, 129.82, 129.41, 129.31, 129.04, 128.79, 128.50, 127.93, 0.00.

HRMS (EI)  $m/z$  ( $\text{M}^+$ ) Calcd for  $\text{C}_{22}\text{H}_{18}\text{Ge}$ : 356.0620; Found: 356.06104.

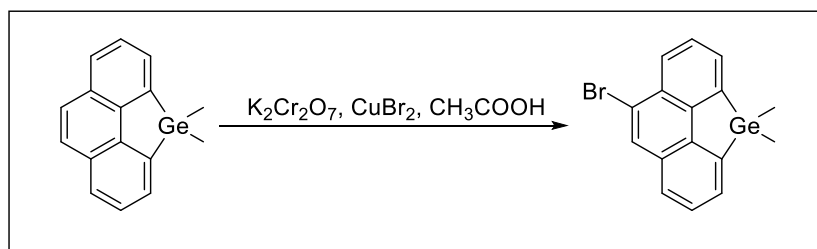

### 8-bromo-4,4-dimethyl-4H-phenanthro[4,5-bcd]germole(1e)

4,4-dimethyl-4H-phenanthro[4,5-bcd]germole (0.2789g, 1 mmol, 1 eq.),  $\text{K}_2\text{Cr}_2\text{O}_7$  (0.3236g, 1.1 mmol, 1.1 eq) and  $\text{CuBr}_2$  (0.2234g, 1 mmol, 1 eq.) was placed into a Schlenk tube equipped with a stir bar. The tube was vacuumed and backfilled with argon for three cycles. Then,  $\text{CH}_3\text{COOH}$  (1 mL) was added. The reaction mixture was stirred at room temperature for 1 h,<sup>5</sup> at the end of which the reaction mixture is partitioned in EtOAc and distilled water (10 mL each). The combined organic layers were washed with brine, and then dried over  $\text{Na}_2\text{SO}_4$ . After filtration, the solvents were removed under reduced pressure to give the crude product. The crude product is purified by silica gel column chromatography to give 125.1 mg title product as a white oil. 35% yield.

$^1\text{H}$  NMR (400 MHz,  $\text{CDCl}_3$ )  $\delta$  8.23 (dd,  $J = 8.2, 1.0$  Hz, 1H), 8.10 (s, 1H), 7.89 (ddd,  $J = 12.4, 6.8, 1.0$  Hz, 2H), 7.80 (dd,  $J = 8.0, 1.0$  Hz, 1H), 7.74 – 7.70 (m, 1H), 7.62 (dd,  $J = 8.0, 6.8$  Hz, 1H), 0.74 (s, 6H).

$^{13}\text{C}$  NMR (101 MHz,  $\text{CDCl}_3$ )  $\delta$  143.53, 142.77, 142.39, 142.36, 133.52, 132.93, 132.60, 131.64, 131.38, 130.03, 129.69, 129.27, 128.71, 123.75, 0.00.

HRMS (EI)  $m/z$  ( $\text{M}^+$ ) Calcd for  $\text{C}_{16}\text{H}_{13}\text{BrGe}$ : 357.9412; Found: 357.93997.

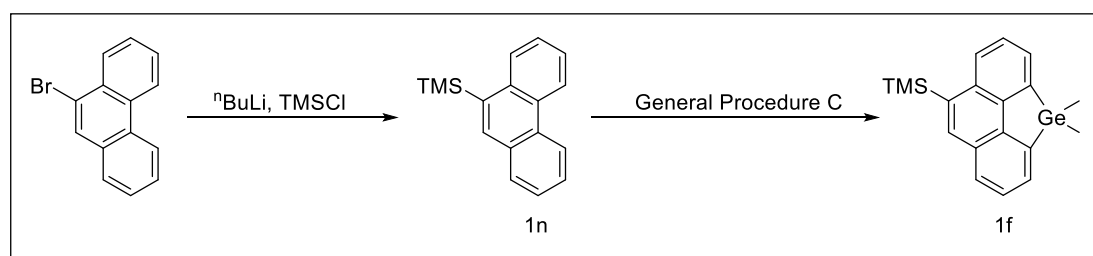

9-Bromophenanthrene (1.0285 g, 4 mmol, 1 eq.) was dissolved in dry  $\text{Et}_2\text{O}$  (8 mL) and cooled to  $-78^\circ\text{C}$ .  $n\text{-BuLi}$  (1.7 mL, 2.4 M in Hexane, 4.2 mmol, 1 eq.) was added dropwise. The mixture was stirred under nitrogen for 30 min. Then  $\text{TMSCl}$  (0.52 mL, 1.05 eq.) was added. The reaction mixture was stirred at room temperature for 3 h, at the end of which the reaction mixture is partitioned in EtOAc and distilled water (10 mL each). The combined organic layers were washed with brine, and then dried over  $\text{Na}_2\text{SO}_4$ . After filtration, the solvents were removed under reduced pressure to give the crude product. The crude product is purified by silica gel column chromatography to give 908.6 mg title product as a white oil. 91% yield.

According general procedure C to get compound 1f.

**trimethyl(phenanthren-9-yl)silane(1n)**

<sup>1</sup>H NMR (400 MHz, CDCl<sub>3</sub>) δ 8.74 – 8.71 (m, 1H), 8.64 (d, J = 8.4 Hz, 1H), 8.16 – 8.13 (m, 1H), 7.95 (s, 1H), 7.87 (dd, J = 7.8, 1.5 Hz, 1H), 7.66 – 7.55 (m, 4H), 0.51 (s, 9H).

<sup>13</sup>C NMR (101 MHz, CDCl<sub>3</sub>) δ 136.37, 134.98, 134.63, 130.84, 130.68, 129.79, 128.60, 128.54, 126.84, 126.31, 125.92, 125.70, 123.04, 122.13, 0.00.

HRMS (EI) m/z (M<sup>+</sup>) Calcd for C<sub>17</sub>H<sub>18</sub>Si: 250.1178; Found:250.11693.

**(4,4-dimethyl-4H-phenanthro[4,5-bcd]germol-8-yl)trimethylsilane(1f)**

According to General Procedure C, using 2-phenylphenanthrene, the title compound was isolated by silica gel column chromatography using petroleum ether as eluent in 25% yield, 174.9 mg, white oil.

<sup>1</sup>H NMR (500 MHz, CDCl<sub>3</sub>) δ 8.11 (dd, J = 8.1, 1.0 Hz, 1H), 7.96 (s, 1H), 7.86 – 7.83 (m, 3H), 7.64 – 7.57 (m, 2H), 0.70 (s, 6H), 0.52 (s, 9H).

<sup>13</sup>C NMR (126 MHz, CDCl<sub>3</sub>) δ 141.15, 140.98, 139.99, 139.64, 136.51, 133.99, 132.80, 130.53, 129.63, 129.14, 127.65, 127.17, 126.67, 126.24, 0.00, -2.52.

HRMS (EI) m/z (M<sup>+</sup>) Calcd for C<sub>19</sub>H<sub>22</sub>GeSi: 352.0703; Found:352.06921.

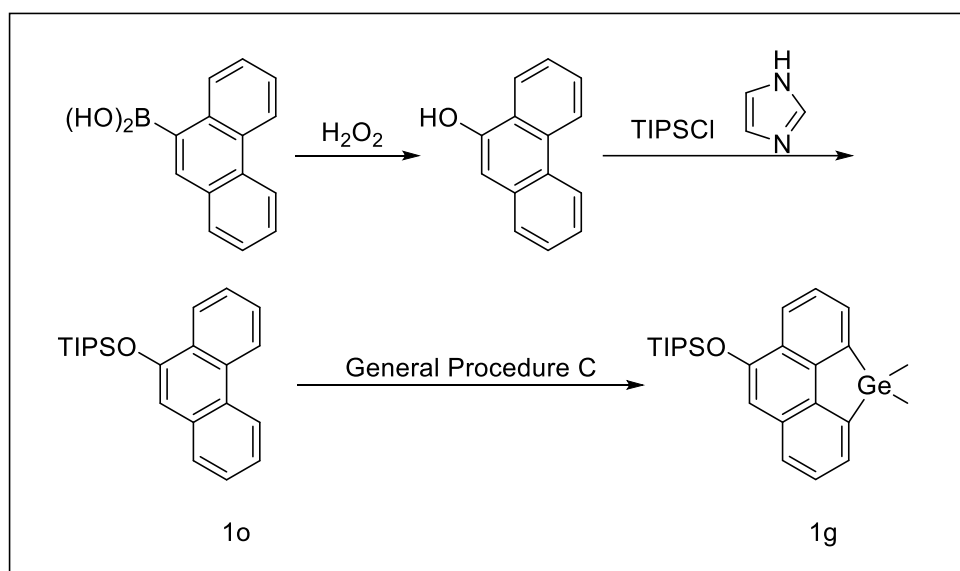

9-Phenanthracenylboronic acid (1.1103 g, 5 mmol, 1 eq.) was placed into a Schlenk tube equipped with a stir bar. The tube was vacuumed and backfilled with argon for three cycles. The dry THF (10 mL) was added under argon and cooled to 0°C, then H<sub>2</sub>O<sub>2</sub> (0.6 mL) was added dropwise. The reaction mixture was stirred at room temperature for 2 h, at the end of which the reaction mixture is partitioned in DCM and distilled water (10 mL each). The combined organic layers were washed with brine, and then dried over Na<sub>2</sub>SO<sub>4</sub>. After filtration, the solvents were removed under reduced pressure to give the crude product without purification.

The above compound (0.8239 g, 2 mmol, 1 eq.) and imidazole (0.3404 g, 5 mmol, 2.5 eq.) was placed into a Schlenk tube equipped with a stir bar. The tube was vacuumed and backfilled with argon for three cycles. The DCM (25 mL) was added under argon, then TIPSCl (0.51 mL, 1.2 eq.) was added dropwise. The reaction mixture was stirred at room temperature for 1 h, at the end of which the reaction mixture is partitioned in CH<sub>2</sub>Cl<sub>2</sub> and distilled water (10 mL each). The combined organic layers were washed with brine, and then dried over Na<sub>2</sub>SO<sub>4</sub>. After filtration, the solvents

were removed under reduced pressure to give the crude product. The crude product is purified by silica gel column chromatography to give 322.5 mg title product as a white oil. 46% yield.  
According to general procedure C to get compound 1g.

**triisopropyl(phenanthren-9-yloxy)silane(1o)**

**<sup>1</sup>H NMR (400 MHz, CDCl<sub>3</sub>)** δ 8.69 (dd, J = 7.6, 1.7 Hz, 1H), 8.63 (dd, J = 7.6, 1.7 Hz, 1H), 8.47 – 8.41 (m, 1H), 7.78 – 7.73 (m, 1H), 7.73 – 7.64 (m, 2H), 7.54 (pd, J = 7.0, 1.6 Hz, 2H), 7.11 (s, 1H), 1.52 (dt, J = 14.9, 7.4 Hz, 3H), 1.24 (d, J = 7.5 Hz, 18H).

**<sup>13</sup>C NMR (101 MHz, CDCl<sub>3</sub>)** δ 150.10, 133.05, 131.69, 128.59, 127.11, 126.91, 126.75, 126.70, 126.34, 124.27, 123.30, 122.61, 122.53, 109.78, 18.24, 13.17.

**HRMS (ESI) *m/z* ([M+H]<sup>+</sup>)** Calcd for C<sub>23</sub>H<sub>31</sub>OSi: 351.2144; Found: 351.2143.

**((4,4-dimethyl-4H-phenanthro[4,5-bcd]germol-8-yl)oxy)triisopropylsilane(1g)**

According to General Procedure C, using triisopropyl(phenanthren-9-yloxy)silane, the title compound was isolated by silica gel column chromatography using petroleum ether as eluent in 31% yield, 278.9 mg, white oil.

**<sup>1</sup>H NMR (400 MHz, CDCl<sub>3</sub>)** δ 8.28 (dd, J = 8.1, 1.1 Hz, 1H), 7.89 (dd, J = 6.8, 1.1 Hz, 1H), 7.73 (d, J = 7.3 Hz, 2H), 7.66 (dd, J = 8.1, 6.7 Hz, 1H), 7.60 – 7.55 (m, 1H), 7.09 (s, 1H), 1.52 (dt, J = 14.9, 7.5 Hz, 3H), 1.24 (d, J = 7.5 Hz, 18H), 0.74 (s, 6H).

**<sup>13</sup>C NMR (101 MHz, CDCl<sub>3</sub>)** δ 153.14, 144.18, 142.23, 141.83, 139.25, 132.92, 132.80, 129.95, 129.17, 128.93, 128.77, 127.97, 124.98, 110.97, 20.43, 15.34.

**HRMS (EI) *m/z* (M<sup>+</sup>)** Calcd for C<sub>25</sub>H<sub>34</sub>GeOSi: 452.1591; Found: 452.15848.

## 2.4 Preparation and characterization of multisubstitued pyrene

### General Procedure D:

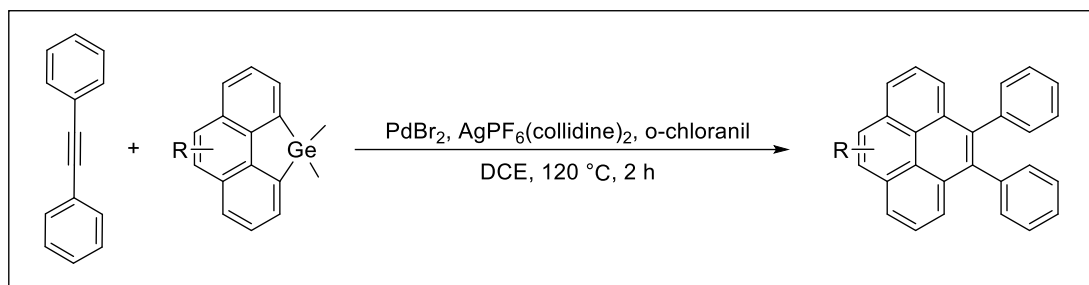

Phenangermole (0.15 mmol)、diphenylethyne (0.0178g, 0.1 mmol)、PdBr<sub>2</sub> (0.0014g, 5 μmol, 5 mol%)、AgPF<sub>6</sub>(collidine)<sub>2</sub> (0.0050g, 10 μmol, 10 mol%) and o-chloranil (0.0507g, 0.2 mmol, 2 eq.) were placed into a Schlenk tube equipped with a stir bar. The tube was vacuumed and backfilled with argon for three cycles. Then, DCE (0.5 mL) was added. The reaction mixture was stirred at 120 °C for 2 h before being quenched with water. The reaction mixture was extracted with EtOAc. The combined organic layers were washed with brine, and then dried over Na<sub>2</sub>SO<sub>4</sub>. After filtration, the solvents were removed under reduced pressure to give the crude product. The purification by flash column chromatography on silica gel.

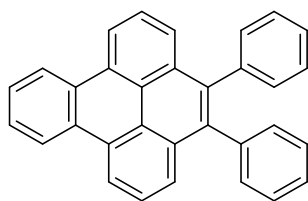

#### 4,5-diphenylbenzo[e]pyrene(4a)

According to General Procedure D, using 4,4-dimethyl-4H-triphenyleno[1,12-bcd]germole at 100°C for 12 h, the title compound was isolated by silica gel column chromatography using petroleum ether as eluent in 41% yield, 16.6 mg, white solid.

**<sup>1</sup>H NMR (400 MHz, CDCl<sub>3</sub>)** δ 8.95 (dd, *J* = 7.9, 1.1 Hz, 2H), 8.90 (dt, *J* = 6.3, 3.5 Hz, 2H), 7.94 (t, *J* = 7.9 Hz, 2H), 7.85 (dd, *J* = 8.0, 1.1 Hz, 2H), 7.78 (dt, *J* = 6.2, 3.4 Hz, 2H), 7.32 – 7.24 (m, 11H).

**<sup>13</sup>C NMR (101 MHz, CDCl<sub>3</sub>)** δ 139.69, 137.70, 131.79, 131.14, 130.19, 129.03, 127.72, 127.58, 126.62, 126.07, 125.96, 123.98, 123.83, 120.33.

**HRMS (ESI) *m/z* ([M+H]<sup>+</sup>)** Calcd for C<sub>32</sub>H<sub>21</sub>: 405.1643; Found: 405.1646.

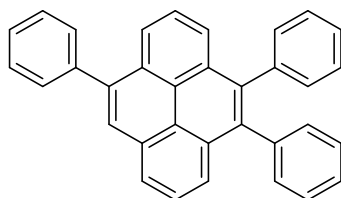

#### 4,5,9-triphenylpyrene(4b)

According to General Procedure D, using 4,4-dimethyl-8-phenyl-4H-phenanthro[4,5-bcd]germole, the title compound was isolated by silica gel column chromatography using petroleum ether as eluent in 67% yield, 28.7 mg, white solid.

**<sup>1</sup>H NMR (500 MHz, CDCl<sub>3</sub>)** δ 8.21 (td, *J* = 6.2, 5.4, 1.5 Hz, 2H), 8.09 (s, 1H), 7.92 (t, *J* = 7.7 Hz, 1H), 7.88 – 7.81 (m, 3H), 7.72 – 7.68 (m, 2H), 7.58 (t, *J* = 7.4 Hz, 2H), 7.53 – 7.48 (m, 1H), 7.33 – 7.22 (m, 10H).

**<sup>13</sup>C NMR (126 MHz, CDCl<sub>3</sub>)** δ 140.97, 139.64, 139.53, 139.51, 137.96, 137.76, 131.61, 131.31, 131.18, 131.17, 130.65, 130.36, 130.18, 128.47, 127.90, 127.75, 127.74, 127.57, 126.66, 126.17, 125.74, 125.27, 125.09, 124.84, 124.58, 123.98, 123.80.

**HRMS (ESI) *m/z* ([M+H]<sup>+</sup>)** Calcd for C<sub>34</sub>H<sub>23</sub>: 431.1800; Found: 431.1780.

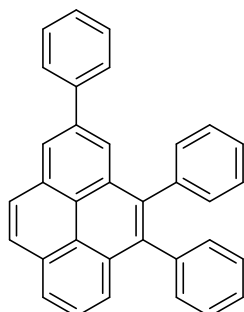

#### 2,4,5-triphenylpyrene(4c)

According to General Procedure D, using 4,4-dimethyl-2-phenyl-4H-phenanthro[4,5-bcd]germole, the title compound was isolated by silica gel column chromatography using petroleum ether as eluent in 43% yield, 18.5 mg, yellow solid.

**<sup>1</sup>H NMR (400 MHz, CDCl<sub>3</sub>)** δ 8.35 (d, J = 1.7 Hz, 1H), 8.15 – 8.06 (m, 3H), 8.00 (d, J = 1.7 Hz, 1H), 7.83 (t, J = 7.6 Hz, 1H), 7.79 – 7.75 (m, 1H), 7.62 (dd, J = 7.5, 1.6 Hz, 2H), 7.39 (t, J = 7.5 Hz, 2H), 7.30 (d, J = 7.2 Hz, 1H), 7.28 – 7.18 (m, 10H).

**<sup>13</sup>C NMR (101 MHz, CDCl<sub>3</sub>)** δ 141.65, 139.51, 139.35, 138.79, 138.24, 137.98, 131.86, 131.49, 131.39, 131.16, 131.02, 128.90, 128.05, 127.86, 127.79, 127.73, 127.58, 127.31, 126.72, 126.65, 125.94, 125.24, 125.09, 124.14, 123.84, 123.67, 123.49.

**HRMS (ESI) *m/z* ([M+H]<sup>+</sup>)** Calcd for C<sub>34</sub>H<sub>22</sub>: 430.1722 ; Found: 430.17130 .

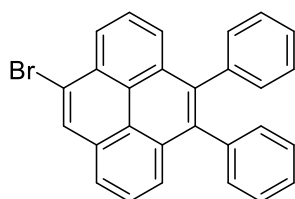

**9-bromo-4,5-diphenylpyrene(4d)**

According to General Procedure D, using 8-bromo-4,4-dimethyl-4H-phenanthro[4,5-bcd]germole, the title compound was isolated by silica gel column chromatography using petroleum ether as eluent in 45% yield, 19.3 mg, white solid.

**<sup>1</sup>H NMR (400 MHz, CDCl<sub>3</sub>)** δ 8.63 (d, J = 7.7 Hz, 1H), 8.50 (s, 1H), 8.13 (d, J = 7.1 Hz, 1H), 7.99 (t, J = 7.9 Hz, 1H), 7.89 (dt, J = 11.0, 6.7 Hz, 3H), 7.35 – 7.20 (m, 12H).

**<sup>13</sup>C NMR (101 MHz, CDCl<sub>3</sub>)** δ 139.29, 139.18, 137.91, 137.87, 131.52, 131.41, 131.14, 131.09, 131.08, 130.92, 129.55, 127.80, 127.76, 126.79, 126.77, 126.45, 126.42, 126.12, 125.56, 125.13, 125.07, 124.67, 123.37, 122.47.

**HRMS (EI) *m/z* (M<sup>+</sup>)** Calcd for C<sub>28</sub>H<sub>17</sub>Br: 432.0514; Found: 432.05044.

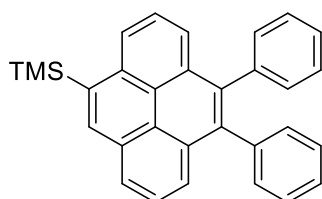

**(9,10-diphenylpyren-4-yl)trimethylsilane(4e)**

According to General Procedure D, using (4,4-dimethyl-4H-phenanthro[4,5-bcd]germol-8-yl)trimethylsilane, the title compound was isolated by silica gel column chromatography using petroleum ether as eluent in 79% yield, 33.5 mg, white solid.

**<sup>1</sup>H NMR (400 MHz, CDCl<sub>3</sub>)** δ 8.44 (dd, J = 7.7, 1.1 Hz, 1H), 8.36 (s, 1H), 8.23 – 8.18 (m, 1H), 7.92 (q, J = 7.5 Hz, 2H), 7.84 (dt, J = 7.9, 1.3 Hz, 2H), 7.33 – 7.23 (m, 10H), 0.62 (s, 9H).

**<sup>13</sup>C NMR (101 MHz, CDCl<sub>3</sub>)** δ 139.40, 139.24, 137.65, 137.21, 135.34, 133.61, 131.63, 130.87, 130.84, 129.89, 127.41, 127.39, 126.29, 125.59, 125.38, 125.13, 125.01, 124.98, 124.30, 123.93, 0.00.

**HRMS (EI) *m/z* (M<sup>+</sup>)** Calcd for C<sub>31</sub>H<sub>26</sub>Si: 426.1804; Found: 426.17980.

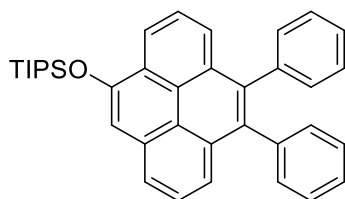

**((9,10-diphenylpyren-4-yl)oxy)triisopropylsilane(4f)**

According to General Procedure D, using ((4,4-dimethyl-4H-phenanthro[4,5-bcd]germol-8-yl)oxy)triisopropylsilane, the title compound was isolated by silica gel column chromatography using petroleum ether as eluent in 50% yield, 26.4 mg, white solid.

**<sup>1</sup>H NMR (400 MHz, CDCl<sub>3</sub>)** δ 8.66 (dd, *J* = 7.7, 1.2 Hz, 1H), 8.04 (dd, *J* = 7.6, 1.0 Hz, 1H), 7.93 (t, *J* = 7.8 Hz, 1H), 7.88 – 7.81 (m, 2H), 7.68 (dd, *J* = 7.9, 1.1 Hz, 1H), 7.33 – 7.20 (m, 12H), 1.57 (q, *J* = 7.5 Hz, 3H), 1.26 (d, *J* = 7.5 Hz, 18H).

**<sup>13</sup>C NMR (101 MHz, CDCl<sub>3</sub>)** δ 150.90, 139.63, 137.74, 137.63, 132.04, 131.33, 131.18, 127.68, 127.62, 126.57, 126.54, 126.07, 125.52, 125.35, 123.62, 122.79, 120.80, 120.34, 110.08, 18.27, 14.16, 13.23.

**HRMS (ESI) *m/z* ([M+H]<sup>+</sup>)** Calcd for C<sub>37</sub>H<sub>38</sub>OSi: 527.2770; Found: 527.2756.

### 3. Aromatization reaction

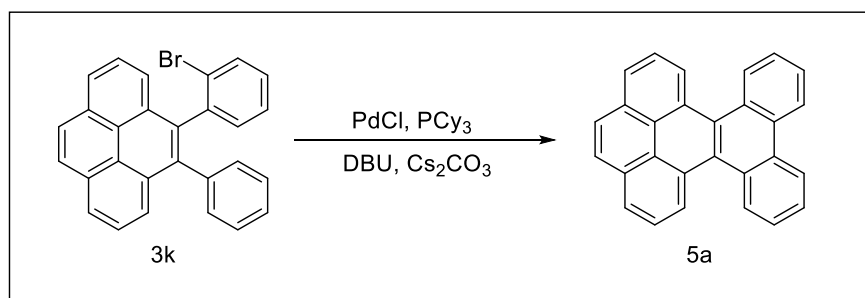

Compound 3k (0.0433g, 0.1 mmol), PdCl<sub>2</sub> (0.0071g, 0.04 mmol, 0.4 eq.), PCy<sub>3</sub> (0.0229g, 0.08 mmol, 0.8 eq.) and Cs<sub>2</sub>CO<sub>3</sub> (0.0665g, 0.2 mmol, 2 eq.) were placed into a Schlenk tube equipped with a stir bar. The tube was vacuumed and backfilled with argon for three cycles. Then, DBU (30 uL, 0.2 mmol, 2 eq.) and toluene (2.5 mL) was added. The reaction mixture was stirred at 100 °C for 48 h before being quenched with water.<sup>6</sup> The reaction mixture was extracted with EtOAc. The combined organic layers were washed with brine, and then dried over Na<sub>2</sub>SO<sub>4</sub>. After filtration, the solvents were removed under reduced pressure to give the crude product. The purification by flash column chromatography on silica to give 24.9 mg title product as a yellow solid. 71% yield.

**tribenzo[f,ij,no]tetraphene (5a)**

**<sup>1</sup>H NMR (400 MHz, CDCl<sub>3</sub>)** δ 8.95 (d, *J* = 8.0 Hz, 1H), 8.85 (d, *J* = 8.2 Hz, 1H), 8.70 (d, *J* = 8.1 Hz, 1H), 8.15 (d, *J* = 7.6 Hz, 1H), 8.06 (s, 1H), 7.98 (t, *J* = 7.8 Hz, 1H), 7.69 – 7.63 (m, 1H), 7.62 – 7.56 (m, 1H).

**<sup>13</sup>C NMR (101 MHz, CDCl<sub>3</sub>)** δ 131.22, 130.93, 129.73, 128.75, 128.40, 128.03, 127.36, 126.86, 126.68, 126.30, 125.57, 125.15, 124.72, 123.68.

**HRMS (EI) *m/z* (M<sup>+</sup>)** Calcd for C<sub>28</sub>H<sub>16</sub>: 352.1252; Found: 352.12462.



#### 4. Conversion of propargyl bromide

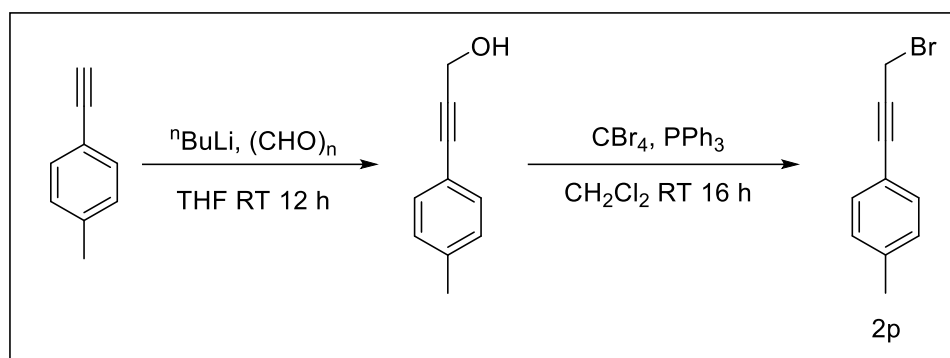

A 25 mL Schlenk tube was charged with 4-ethynyltoluene (580.8 mg, 0.65 mL, 5 mmol) and dry THF (5 mL). The solution was cooled to  $-78^\circ\text{C}$  and  $n\text{-BuLi}$  (2.4 M in Hexane, 2.3 mL, 5.5 mmol) was added dropwise. Paraformaldehyde (0.18 g, 6 mmol) was added under argon. The reaction was stirred at ambient temperature for 12 h and acidified with HCl at  $0^\circ\text{C}$ .<sup>7</sup> The reaction mixture was extracted with EtOAc/ $\text{H}_2\text{O}$ . The combined organic layer was washed with brine, dried over  $\text{Na}_2\text{SO}_4$ , filtered, and concentrated under vacuum. The crude 3-(4-methylphenyl)prop-2-yn-1-ol (white solid) was kept for a few hours under vacuum and used for next step without further purification.

The propargyl alcohol (estimated as 5 mmol) in dry  $\text{CH}_2\text{Cl}_2$  (10 mL) was loaded into a 25 mL Schlenk tube. Carbon tetrabromide (2.03 g, 6 mmol) was added under argon. The homogeneous solution was cooled to  $0^\circ\text{C}$  and  $\text{PPh}_3$  (1.57 g, 6 mmol) was added in small portions under argon (highly exothermic). The reaction mixture was stirred at room temperature for 16 h. EtOH (5 mL) was added to quench the reaction, followed by ice-water. The combined organic layers were washed with brine, and then dried over  $\text{Na}_2\text{SO}_4$ . After filtration, the solvents were removed under reduced pressure to give the crude product. The purification by flash column chromatography (petroleum ether) to give 894.1 mg title product as a yellow oil. 94% yield.

##### 1-(3-bromoprop-1-yn-1-yl)-4-methylbenzene(2p)

$^1\text{H}$  NMR (400 MHz,  $\text{CDCl}_3$ )  $\delta$  7.34 (d,  $J = 8.2$  Hz, 2H), 7.13 (d,  $J = 7.9$  Hz, 2H), 4.17 (s, 2H), 2.36 (s, 3H).

$^{13}\text{C}$  NMR (101 MHz,  $\text{CDCl}_3$ )  $\delta$  139.13, 131.80, 129.12, 119.03, 86.99, 83.59, 21.58, 15.70.

HRMS (EI)  $m/z$  ( $\text{M}^+$ ) Calcd for  $\text{C}_{10}\text{H}_9\text{Br}$ : 207.9888; Found: 207.98819.

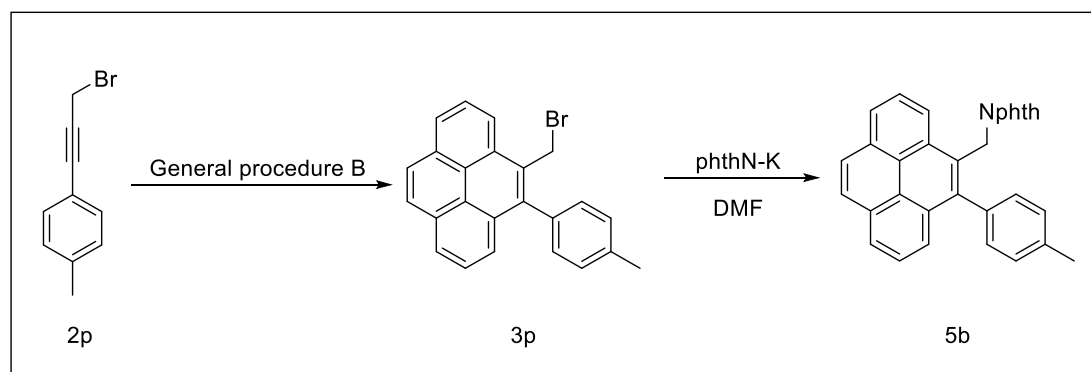

Compound 3p (0.0385g, 0.1 mmol, 1 eq.) and Potassium phthalimide (0.0189g, 0.1 mmol, 1 eq.) were

placed into a Schlenk tube equipped with a stir bar. The tube was vacuumed and backfilled with argon for three cycles. Then, DMF (0.5 mL) was added.<sup>8</sup> The reaction mixture was stirred at room temperature for 4 h before being quenched with water. The reaction mixture was extracted with EtOAc. The combined organic layers were washed with brine, and then dried over Na<sub>2</sub>SO<sub>4</sub>. After filtration, the solvents were removed under reduced pressure to give the crude product. The purification by flash column chromatography on silica to give 30.3 mg title product as a white solid. 67% yield.

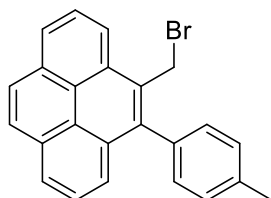

#### 4-(bromomethyl)-5-(p-tolyl)pyrene (3p)

According to General Procedure B, using 1-(3-bromoprop-1-yn-1-yl)-4-methylbenzene, the title compound was isolated by silica gel column chromatography using petroleum ether as eluent in 37% yield, 14.3 mg, white solid.

**<sup>1</sup>H NMR (400 MHz, CDCl<sub>3</sub>)** δ 8.54 (dd, J = 8.0, 1.1 Hz, 1H), 8.25 (dd, J = 7.7, 1.1 Hz, 1H), 8.18 (dd, J = 7.6, 1.2 Hz, 1H), 8.19 – 8.05 (m, 3H), 7.92 – 7.79 (m, 1H), 7.77 – 7.66 (m, 1H), 7.44 – 7.32 (m, 4H), 5.04 (s, 2H), 2.53 (s, 3H).

**<sup>13</sup>C NMR (101 MHz, CDCl<sub>3</sub>)** δ 140.44, 137.67, 135.36, 131.49, 131.28, 130.90, 130.06, 129.78, 129.34, 129.29, 128.92, 127.61, 127.57, 127.35, 126.33, 125.97, 125.90, 125.88, 125.77, 125.49, 124.67, 124.55, 122.09, 42.60, 21.47.

**HRMS (ESI) *m/z* ([M+H]<sup>+</sup>)** Calcd for C<sub>24</sub>H<sub>18</sub>Br: 385.0592; Found: 385.0580.

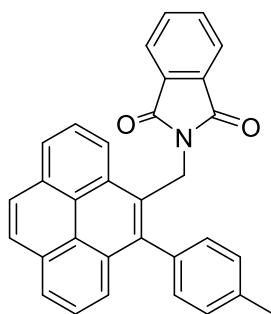

#### 2-((5-(p-tolyl)pyren-4-yl)methyl)isoindoline-1,3-dione (5b)

**<sup>1</sup>H NMR (500 MHz, CDCl<sub>3</sub>)** δ 8.34 (dd, J = 8.0, 1.0 Hz, 1H), 8.16 (ddd, J = 7.7, 5.3, 1.0 Hz, 2H), 8.10 – 8.05 (m, 2H), 7.97 (t, J = 7.8 Hz, 1H), 7.87 (t, J = 7.7 Hz, 1H), 7.74 (dd, J = 7.9, 1.1 Hz, 1H), 7.70 (dd, J = 5.5, 3.1 Hz, 2H), 7.61 – 7.57 (m, 2H), 7.56 – 7.54 (m, 2H), 7.38 (d, J = 7.7 Hz, 2H), 5.40 (s, 2H), 2.49 (s, 3H).

**<sup>13</sup>C NMR (126 MHz, CDCl<sub>3</sub>)** δ 168.22, 141.08, 137.21, 136.22, 133.80, 131.86, 131.74, 131.56, 131.07, 130.87, 129.35, 129.00, 127.42, 127.38, 127.20, 126.24, 125.78, 125.64, 125.49, 125.09, 124.54, 124.35, 123.07, 121.32, 39.50, 21.44.

**HRMS (ESI) *m/z* ([M+H]<sup>+</sup>)** Calcd for C<sub>32</sub>H<sub>22</sub>NO<sub>2</sub>: 452.1651; Found: 452.1642.

## 5. Competition experiments

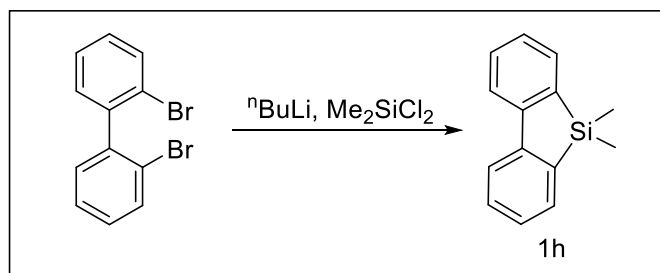

2,2'-Dibromo-1,1'-biphenyl (0.6367 g, 2 mmol, 1 eq.) was dissolved in dry THF (10 mL) and cooled to  $-78^{\circ}\text{C}$ .  $n\text{-BuLi}$  (2.4 M in Hexane, 1.7 mL, 4 mmol, 2 eq.) was added dropwise. The mixture was stirred under nitrogen for 1 h. Then  $\text{Me}_2\text{SiCl}_2$  (0.24 mL, 2.4 mmol, 1.2 eq.) was added. The reaction mixture was stirred at room temperature for 2 h,<sup>9</sup> at the end of which the reaction mixture is partitioned in EtOAc and distilled water (10 mL each). The combined organic layers were washed with brine, and then dried over  $\text{Na}_2\text{SO}_4$ . After filtration, the solvents were removed under reduced pressure to give the crude product. The crude product is purified by silica gel column chromatography to give 397.7 mg title product as a white solid. 95% yield.

### 5,5-dimethyl-5H-dibenzo[b,d]silole(2h)

$^1\text{H}$  NMR (400 MHz,  $\text{CDCl}_3$ )  $\delta$  7.84 (d,  $J = 7.8$  Hz, 2H), 7.64 (ddd,  $J = 7.0, 1.4, 0.7$  Hz, 2H), 7.44 (td,  $J = 7.6, 1.4$  Hz, 2H), 7.29 (td,  $J = 7.3, 0.9$  Hz, 2H), 0.43 (s, 6H).

$^{13}\text{C}$  NMR (101 MHz,  $\text{CDCl}_3$ )  $\delta$  147.78, 138.92, 132.73, 130.17, 127.35, 120.82, -3.22.

HRMS (EI)  $m/z$  ( $\text{M}^{+\bullet}$ ) Calcd for  $\text{C}_{14}\text{H}_{14}\text{Si}$ : 210.0865; Found: 210.08557.

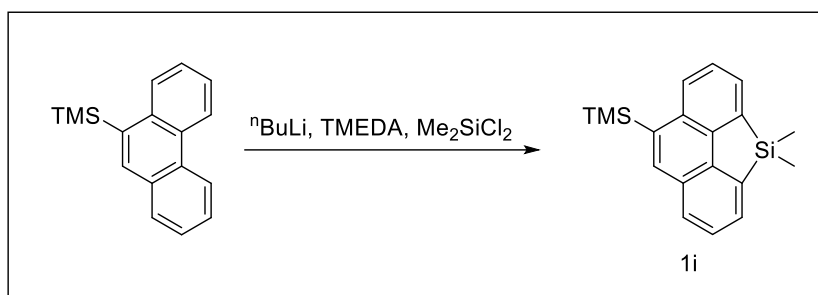

Trimethyl(phenanthren-9-yl)silane (1.0017g, 4 mmol, 1 eq.) and TMEDA (1.44mL, 9.6 mmol, 2.4 eq) were placed into a Schlenk tube equipped with a stir bar. the tube was vacuumed and backfilled with argon for three cycles. Then, a solution of  $n\text{-BuLi}$  (2.4 M in Hexane, 3.68mL, 8.8 mmol, 2.2 eq.) was added dropwise at  $0^{\circ}\text{C}$ . After stirring at  $60^{\circ}\text{C}$  for 3 h, anhydrous THF (9.6 mL) was added,  $\text{Me}_2\text{SiCl}_2$  (0.67mL, 6.8 mmol, 1.7 eq.) was added at  $-78^{\circ}\text{C}$ . The reaction mixture was stirred at room temperature for 24 h before being quenched with water. The reaction mixture was extracted with EtOAc. The combined organic layers were washed with brine, and then dried over  $\text{Na}_2\text{SO}_4$ . After filtration, the solvents were removed under reduced pressure to give the crude product. The purification by flash column chromatography on silica gel to give 245.5 mg title product as a white oil. 20% yield.

### 4,4-dimethyl-8-(trimethylsilyl)-4H-phenanthro[4,5-bcd]silole(2i)

$^1\text{H}$  NMR (400 MHz,  $\text{CDCl}_3$ )  $\delta$  8.47 (dd,  $J = 8.2, 1.0$  Hz, 1H), 8.32 (s, 1H), 8.24 – 8.17 (m, 3H), 7.95 (ddd,  $J = 11.8, 8.1, 6.8$  Hz, 2H), 0.89 (s, 6H), 0.87 (s, 9H).

$^{13}\text{C}$  NMR (101 MHz,  $\text{CDCl}_3$ )  $\delta$  142.41, 141.22, 138.57, 137.25, 136.44, 133.66, 132.19, 130.55, 129.66, 128.56, 128.16, 127.63, 126.76, 126.36, 0.00, -3.10.

HRMS (EI)  $m/z$  ( $\text{M}^{+}$ ) Calcd for  $\text{C}_{19}\text{H}_{22}\text{Si}_2$ : 306.1260; Found: 306.12518.

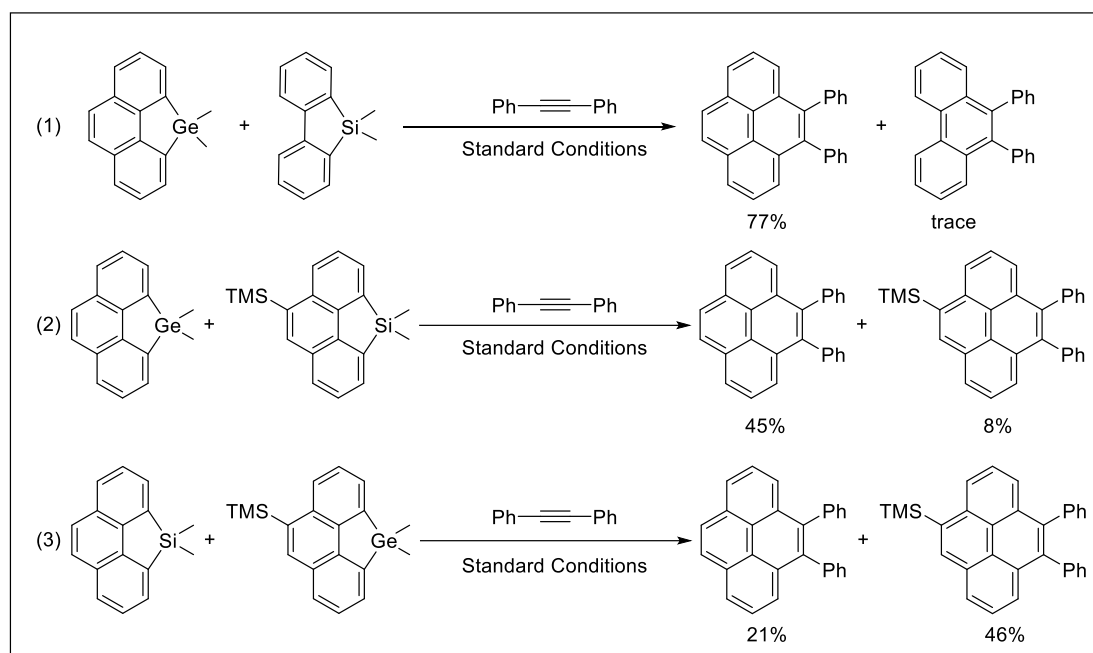

Competition experiment 1 : 4,4-dimethyl-4H-phenanthro[4,5-bcd]germole (0.1 mmol)、5,5-dimethyl-5H-dibenzo[b,d]silole (0.1 mmol)、diphenylethyne(0.1 mmol)、 $\text{PdBr}_2$  (5 mol%)、 $\text{AgPF}_6(\text{collidine})_2$  (10 mol%) and o-chloranil (2 eq.) was placed into a Schlenk tube equipped with a stir bar. The tube was vacuumed and backfilled with argon for three cycles. Then, DCE (0.5 mL) was added. The reaction mixture was stirred at  $120^\circ\text{C}$  for 2 h before being quenched with water. Then triphenylmethane (0.1 mmol) was added, the reaction mixture was extracted with  $\text{Et}_2\text{O}$ . The solvents were removed under reduced pressure to give the crude product. The yield was determined by  $^1\text{H}$  NMR. The competition experiment 2 and 3 were same as above.

## 6. Crystal structure determination of 5b

### 6.1 Experimental procedure and crystal data of 5b

Single crystals of  $\text{C}_{32}\text{H}_{21}\text{NO}_2$  (5b) were grown by slow cooling of saturated  $\text{EtOAc}/\text{Et}_2\text{O}$  solution from  $50^\circ\text{C}$  to room temperature. A suitable crystal was selected and intensity data was collected on a 'Bruker APEX-II CCD' diffractometer. The crystal was kept at 296.15 K during data collection. Using Olex2<sup>10</sup>, the structure was solved with the SHELXT<sup>11</sup> structure solution program using Intrinsic Phasing and refined with the SHELXL<sup>11</sup> refinement package using Least Squares minimisation. **Crystal Data** for  $\text{C}_{32}\text{H}_{21}\text{NO}_2$  ( $M = 451.50$  g/mol): monoclinic, space group  $\text{C2/c}$  (no. 15),  $a = 30.6180(6)$  Å,  $b = 14.6059(3)$  Å,  $c = 20.4158(5)$  Å,  $\beta = 92.2370(10)^\circ$ ,  $V = 9123.1(3)$  Å<sup>3</sup>,  $Z = 16$ ,  $T = 213.00$  K,  $\mu(\text{GaK}\alpha) = 0.410$  mm<sup>-1</sup>,  $D_{\text{calc}} = 1.315$  g/cm<sup>3</sup>, 42094 reflections measured ( $5.026^\circ \leq 2\theta \leq 109.974^\circ$ ), 8685 unique ( $R_{\text{int}} = 0.1352$ ,  $R_{\text{sigma}} = 0.1167$ ) which were used in all calculations. The final  $R_1$  was 0.0763 ( $I > 2\sigma(I)$ ) and  $wR_2$  was 0.2144 (all data).

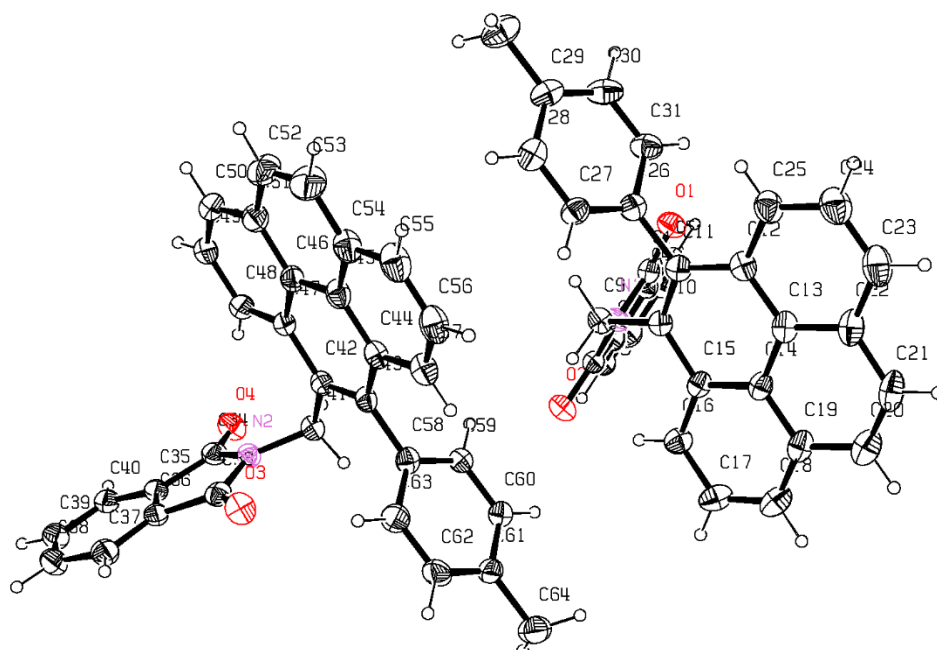

**Figure S1. X-ray Structure of compound 5b.**

**Table 1 Crystal data and structure refinement for  $C_{32}H_{21}NO_2$  (5b).**

|                                               |                                                              |
|-----------------------------------------------|--------------------------------------------------------------|
| Identification code                           | $C_{32}H_{21}NO_2$                                           |
| Empirical formula                             | $C_{32}H_{21}NO_2$                                           |
| Formula weight                                | 451.50                                                       |
| Temperature/K                                 | 213.00                                                       |
| Crystal system                                | monoclinic                                                   |
| Space group                                   | $C2/c$                                                       |
| $a/\text{\AA}$                                | 30.6180(6)                                                   |
| $b/\text{\AA}$                                | 14.6059(3)                                                   |
| $c/\text{\AA}$                                | 20.4158(5)                                                   |
| $\alpha/^\circ$                               | 90                                                           |
| $\beta/^\circ$                                | 92.2370(10)                                                  |
| $\gamma/^\circ$                               | 90                                                           |
| Volume/ $\text{\AA}^3$                        | 9123.1(3)                                                    |
| $Z$                                           | 16                                                           |
| $\rho_{\text{calc}}/\text{g cm}^{-3}$         | 1.315                                                        |
| $\mu/\text{mm}^{-1}$                          | 0.410                                                        |
| $F(000)$                                      | 3776.0                                                       |
| Crystal size/ $\text{mm}^3$                   | $0.07 \times 0.07 \times 0.05$                               |
| Radiation                                     | GaK $\alpha$ ( $\lambda = 1.34139$ )                         |
| $2\theta$ range for data collection/ $^\circ$ | 5.026 to 109.974                                             |
| Index ranges                                  | $-36 \leq h \leq 37, -17 \leq k \leq 15, -24 \leq l \leq 24$ |

|                                                |                                                                  |
|------------------------------------------------|------------------------------------------------------------------|
| Reflections collected                          | 42094                                                            |
| Independent reflections                        | 8685 [ $R_{\text{int}} = 0.1352$ , $R_{\text{sigma}} = 0.1167$ ] |
| Data/restraints/parameters                     | 8685/0/633                                                       |
| Goodness-of-fit on $F^2$                       | 1.001                                                            |
| Final R indexes [ $I \geq 2\sigma(I)$ ]        | $R_1 = 0.0763$ , $wR_2 = 0.1542$                                 |
| Final R indexes [all data]                     | $R_1 = 0.2010$ , $wR_2 = 0.2144$                                 |
| Largest diff. peak/hole / $e \text{ \AA}^{-3}$ | 0.20/-0.27                                                       |

**Table 2 Fractional Atomic Coordinates ( $\times 10^4$ ) and Equivalent Isotropic Displacement Parameters ( $\text{\AA}^2 \times 10^3$ ) for  $\text{C}_{32}\text{H}_{21}\text{NO}_2$  (5b).  $U_{\text{eq}}$  is defined as 1/3 of the trace of the orthogonalised  $U_{\text{ij}}$  tensor.**

| Atom | x          | y          | z          | $U(\text{eq})$ |
|------|------------|------------|------------|----------------|
| O1   | 3300.4(8)  | 7788.3(18) | 6040.9(13) | 55.9(8)        |
| O2   | 2893.0(8)  | 8978.1(18) | 4040.0(13) | 54.1(7)        |
| N1   | 3213.6(9)  | 8379(2)    | 4990.3(14) | 41.8(8)        |
| C1   | 3075.3(12) | 8162(3)    | 5620(2)    | 44.3(10)       |
| C2   | 2868.2(12) | 8749(2)    | 4609(2)    | 41.0(9)        |
| C3   | 2487.1(11) | 8801(2)    | 5032.3(18) | 39.6(9)        |
| C4   | 2612.6(11) | 8465(2)    | 5643.1(18) | 38.2(9)        |
| C5   | 2329.9(13) | 8446(3)    | 6144(2)    | 50.4(10)       |
| C6   | 1907.2(13) | 8773(3)    | 6017(2)    | 55.7(11)       |
| C7   | 1781.7(13) | 9105(3)    | 5401(2)    | 52.3(11)       |
| C8   | 2070.4(12) | 9119(2)    | 4891(2)    | 46.3(10)       |
| C9   | 3640.5(11) | 8122(3)    | 4736.1(18) | 44.1(10)       |
| C10  | 4023.7(11) | 8576(2)    | 5098.8(17) | 39.9(9)        |
| C11  | 4299.0(11) | 8065(3)    | 5492.7(18) | 43.2(10)       |
| C12  | 4639.3(11) | 8498(3)    | 5896.5(18) | 46.4(10)       |
| C13  | 4698.7(11) | 9467(3)    | 5842.7(19) | 47.0(10)       |
| C14  | 4433.6(12) | 9981(3)    | 5389.0(19) | 43.3(10)       |
| C15  | 4091.2(11) | 9557(2)    | 5015.8(18) | 41.6(10)       |
| C16  | 3846.0(12) | 10075(3)   | 4565(2)    | 49.9(11)       |
| C17  | 3929.7(14) | 10999(3)   | 4492(2)    | 63.7(13)       |
| C18  | 4250.5(14) | 11427(3)   | 4866(2)    | 63.3(12)       |
| C19  | 4507.8(12) | 10933(3)   | 5318(2)    | 51.3(11)       |
| C20  | 4841.6(14) | 11357(3)   | 5716(2)    | 66.3(13)       |

**Table 2 Fractional Atomic Coordinates ( $\times 10^4$ ) and Equivalent Isotropic Displacement Parameters ( $\text{\AA}^2 \times 10^3$ ) for  $\text{C}_{32}\text{H}_{21}\text{NO}_2$  (5b).  $U_{\text{eq}}$  is defined as 1/3 of the trace of the orthogonalised  $U_{\text{H}}$  tensor.**

| Atom | x          | y          | z          | U(eq)    |
|------|------------|------------|------------|----------|
| C21  | 5089.1(14) | 10873(3)   | 6151(2)    | 69.3(14) |
| C22  | 5029.0(13) | 9908(3)    | 6230(2)    | 56.4(12) |
| C23  | 5282.8(14) | 9399(4)    | 6684(2)    | 74.3(14) |
| C24  | 5220.4(14) | 8469(4)    | 6734(2)    | 71.9(14) |
| C25  | 4909.0(13) | 8021(3)    | 6342(2)    | 60.0(12) |
| C26  | 4280.6(11) | 7033(3)    | 5504(2)    | 45.1(10) |
| C27  | 4437.7(12) | 6557(3)    | 4979(2)    | 49.3(10) |
| C28  | 4451.2(12) | 5609(3)    | 4978(2)    | 55.8(11) |
| C29  | 4307.7(12) | 5104(3)    | 5502(2)    | 52.7(11) |
| C30  | 4147.3(13) | 5584(3)    | 6022(2)    | 63.2(13) |
| C31  | 4131.7(13) | 6531(3)    | 6031(2)    | 56.6(11) |
| C32  | 4331.2(13) | 4071(3)    | 5499(3)    | 75.3(15) |
| O3   | 3445.6(9)  | 7047.3(19) | 747.5(14)  | 60.4(8)  |
| O4   | 2047.5(9)  | 6280.5(19) | 1230.2(13) | 58.9(8)  |
| N2   | 2775.8(10) | 6658(2)    | 1158.0(15) | 43.7(8)  |
| C33  | 3072.9(13) | 6764(2)    | 667(2)     | 46.8(10) |
| C34  | 2365.9(14) | 6386(3)    | 900(2)     | 48.0(10) |
| C35  | 2417.4(13) | 6266(2)    | 186.0(19)  | 44.7(10) |
| C36  | 2843.1(13) | 6478(2)    | 43.8(19)   | 45.0(10) |
| C37  | 2992.6(14) | 6421(3)    | -580(2)    | 55.2(11) |
| C38  | 2697.6(17) | 6117(3)    | -1063(2)   | 65.7(13) |
| C39  | 2268.2(16) | 5900(3)    | -926(2)    | 62.2(12) |
| C40  | 2119.5(14) | 5979(2)    | -297(2)    | 52.2(11) |
| C41  | 2860.8(12) | 6911(3)    | 1846.1(17) | 45.5(10) |
| C44  | 3984.7(12) | 6471(3)    | 2685.3(18) | 44.7(10) |
| C42  | 3252.3(12) | 6424(3)    | 2168.9(17) | 41.6(9)  |
| C47  | 3238.1(12) | 5444(3)    | 2245.7(18) | 42.8(10) |
| C43  | 3606.9(11) | 6929(3)    | 2381.5(17) | 41.0(9)  |
| C45  | 3978.5(12) | 5509(3)    | 2757.7(18) | 48.3(10) |
| C58  | 3620.4(11) | 7951(3)    | 2331.0(19) | 43.2(10) |
| C46  | 3607.9(13) | 4991(3)    | 2543.2(18) | 46.1(10) |
| C48  | 2881.1(13) | 4910(3)    | 2043.8(19) | 49.0(11) |
| C49  | 2884.1(14) | 3967(3)    | 2108.5(19) | 56.7(12) |
| C50  | 3240.3(15) | 3531(3)    | 2395(2)    | 61.8(12) |

**Table 2 Fractional Atomic Coordinates ( $\times 10^4$ ) and Equivalent Isotropic Displacement Parameters ( $\text{\AA}^2 \times 10^3$ ) for  $\text{C}_{32}\text{H}_{21}\text{NO}_2$  (5b).  $U_{\text{eq}}$  is defined as 1/3 of the trace of the orthogonalised  $U_{\text{ij}}$  tensor.**

| Atom | x          | y        | z          | U(eq)    |
|------|------------|----------|------------|----------|
| C51  | 3601.6(14) | 4025(3)  | 2626(2)    | 55.9(11) |
| C52  | 3975.7(16) | 3592(3)  | 2930(2)    | 75.7(15) |
| C53  | 4330.1(16) | 4084(3)  | 3131(3)    | 81.8(16) |
| C54  | 4349.4(13) | 5054(3)  | 3053(2)    | 60.2(12) |
| C55  | 4715.9(14) | 5572(4)  | 3252(2)    | 69.2(13) |
| C56  | 4717.0(13) | 6510(4)  | 3184(2)    | 64.1(13) |
| C57  | 4358.3(12) | 6954(3)  | 2906.3(19) | 55.9(11) |
| C59  | 3406.3(12) | 8482(3)  | 2778.1(18) | 44.8(10) |
| C60  | 3423.5(12) | 9424(3)  | 2757.8(19) | 48.2(10) |
| C61  | 3658.0(13) | 9869(3)  | 2296(2)    | 48.9(10) |
| C62  | 3870.4(14) | 9337(3)  | 1849(2)    | 61.1(12) |
| C63  | 3855.3(13) | 8397(3)  | 1861(2)    | 57.5(11) |
| C64  | 3678.5(15) | 10903(3) | 2278(2)    | 74.6(14) |

**Table 3 Anisotropic Displacement Parameters ( $\text{\AA}^2 \times 10^3$ ) for  $\text{C}_{32}\text{H}_{21}\text{NO}_2$  (5b). The Anisotropic displacement factor exponent takes the form:  $-2\pi^2[\text{h}^2\text{a}^{*2}\text{U}_{11} + 2\text{hka}^*\text{b}^*\text{U}_{12} + \dots]$ .**

| Atom | U <sub>11</sub> | U <sub>22</sub> | U <sub>33</sub> | U <sub>23</sub> | U <sub>13</sub> | U <sub>12</sub> |
|------|-----------------|-----------------|-----------------|-----------------|-----------------|-----------------|
| O1   | 52.6(17)        | 64.4(19)        | 50.1(18)        | 9.5(15)         | -5.1(14)        | 1.4(14)         |
| O2   | 52.5(17)        | 69(2)           | 41.1(17)        | 5.3(14)         | -0.1(14)        | 1.2(14)         |
| N1   | 36.6(18)        | 51(2)           | 38.5(19)        | 5.4(16)         | 3.5(15)         | 1.0(15)         |
| C1   | 47(2)           | 42(2)           | 44(3)           | -5(2)           | -2(2)           | -4.4(19)        |
| C2   | 45(2)           | 38(2)           | 40(2)           | -0.6(19)        | 1(2)            | -5.2(18)        |
| C3   | 37(2)           | 34(2)           | 47(3)           | -2.8(19)        | 1.1(19)         | -6.4(17)        |
| C4   | 39(2)           | 36(2)           | 41(2)           | -2.9(18)        | 4.7(19)         | -5.6(17)        |
| C5   | 55(3)           | 49(3)           | 47(3)           | -2(2)           | 4(2)            | -6(2)           |
| C6   | 53(3)           | 56(3)           | 59(3)           | -7(2)           | 18(2)           | -5(2)           |
| C7   | 44(2)           | 45(3)           | 68(3)           | -2(2)           | 2(2)            | -4.8(19)        |
| C8   | 49(3)           | 42(3)           | 48(3)           | -0.5(19)        | 1(2)            | -8.5(19)        |
| C9   | 39(2)           | 51(3)           | 42(2)           | -0.5(19)        | 2.0(19)         | 0.7(19)         |
| C10  | 35(2)           | 44(2)           | 41(2)           | -2.0(19)        | 4.3(18)         | -0.5(18)        |
| C11  | 39(2)           | 47(3)           | 44(2)           | -1(2)           | 6.7(19)         | -1.6(19)        |
| C12  | 38(2)           | 56(3)           | 45(3)           | -5(2)           | 3.0(19)         | 5(2)            |
| C13  | 33(2)           | 56(3)           | 52(3)           | -12(2)          | 6(2)            | -0.8(19)        |



**Table 3 Anisotropic Displacement Parameters ( $\text{\AA}^2 \times 10^3$ ) for  $\text{C}_{32}\text{H}_{21}\text{NO}_2$  (5b). The Anisotropic displacement factor exponent takes the form:  $-2\pi^2[\text{h}^2\text{a}^{*2}\text{U}_{11}+2\text{hka}^*\text{b}^*\text{U}_{12}+\dots]$ .**

| Atom | $\text{U}_{11}$ | $\text{U}_{22}$ | $\text{U}_{33}$ | $\text{U}_{23}$ | $\text{U}_{13}$ | $\text{U}_{12}$ |
|------|-----------------|-----------------|-----------------|-----------------|-----------------|-----------------|
| C14  | 40(2)           | 43(3)           | 47(3)           | -10(2)          | 11(2)           | -1.9(19)        |
| C15  | 38(2)           | 40(3)           | 47(2)           | -4.8(19)        | 6.5(19)         | -2.8(18)        |
| C16  | 44(2)           | 48(3)           | 58(3)           | 4(2)            | 0(2)            | 2(2)            |
| C17  | 61(3)           | 47(3)           | 83(4)           | 12(3)           | 5(3)            | 3(2)            |
| C18  | 56(3)           | 46(3)           | 88(4)           | -2(3)           | 12(3)           | -7(2)           |
| C19  | 40(2)           | 53(3)           | 61(3)           | -15(2)          | 12(2)           | -8(2)           |
| C20  | 56(3)           | 58(3)           | 85(4)           | -17(3)          | 11(3)           | -8(2)           |
| C21  | 52(3)           | 75(4)           | 80(4)           | -33(3)          | 0(3)            | -16(3)          |
| C22  | 42(2)           | 65(3)           | 62(3)           | -22(2)          | 2(2)            | -2(2)           |
| C23  | 53(3)           | 95(4)           | 74(4)           | -20(3)          | -13(3)          | -3(3)           |
| C24  | 56(3)           | 87(4)           | 71(3)           | -6(3)           | -14(3)          | 6(3)            |
| C25  | 52(3)           | 66(3)           | 61(3)           | -6(2)           | -12(2)          | 5(2)            |
| C26  | 36(2)           | 48(3)           | 51(3)           | 1(2)            | -1.6(19)        | -0.5(19)        |
| C27  | 48(2)           | 43(3)           | 57(3)           | 1(2)            | 10(2)           | -3(2)           |
| C28  | 42(2)           | 56(3)           | 69(3)           | -7(2)           | 5(2)            | -1(2)           |
| C29  | 31(2)           | 45(3)           | 82(3)           | 9(3)            | -1(2)           | 0.0(19)         |
| C30  | 53(3)           | 61(3)           | 77(3)           | 26(3)           | 16(3)           | 8(2)            |
| C31  | 58(3)           | 58(3)           | 54(3)           | 12(2)           | 12(2)           | 7(2)            |
| C32  | 54(3)           | 52(3)           | 119(4)          | 9(3)            | 3(3)            | -5(2)           |
| O3   | 44.0(17)        | 75(2)           | 62(2)           | -2.0(15)        | 2.3(15)         | 3.7(15)         |
| O4   | 49.7(17)        | 76(2)           | 50.7(18)        | 6.1(15)         | 0.8(15)         | -9.9(15)        |
| N2   | 44.6(19)        | 46(2)           | 40(2)           | 1.0(16)         | -1.3(16)        | 1.5(16)         |
| C33  | 48(3)           | 40(3)           | 53(3)           | 3(2)            | 4(2)            | 11(2)           |
| C34  | 51(3)           | 45(3)           | 47(3)           | 7(2)            | -8(2)           | 1(2)            |
| C35  | 53(3)           | 40(2)           | 40(2)           | 3.6(19)         | -6(2)           | 5(2)            |
| C36  | 56(3)           | 38(2)           | 41(3)           | 3.4(19)         | -2(2)           | 10.5(19)        |
| C37  | 62(3)           | 51(3)           | 53(3)           | 4(2)            | 2(2)            | 12(2)           |
| C38  | 92(4)           | 61(3)           | 44(3)           | 4(2)            | 3(3)            | 13(3)           |
| C39  | 82(4)           | 56(3)           | 48(3)           | 3(2)            | -11(3)          | 10(3)           |
| C40  | 63(3)           | 45(3)           | 48(3)           | 4(2)            | -5(2)           | 1(2)            |
| C41  | 47(2)           | 50(3)           | 40(2)           | -1.5(19)        | 1.1(19)         | 1.5(19)         |
| C44  | 43(2)           | 56(3)           | 36(2)           | -4(2)           | 2.7(19)         | 1(2)            |
| C42  | 44(2)           | 45(3)           | 35(2)           | -2.1(19)        | -0.3(18)        | 4.0(19)         |
| C47  | 51(2)           | 41(3)           | 36(2)           | -2.2(18)        | -2.2(19)        | 1(2)            |

**Table 3 Anisotropic Displacement Parameters ( $\text{\AA}^2 \times 10^3$ ) for  $\text{C}_{32}\text{H}_{21}\text{NO}_2$  (5b). The Anisotropic displacement factor exponent takes the form:  $-2\pi^2[h^2a^{*2}U_{11}+2hka^*b^*U_{12}+\dots]$ .**

| Atom | $U_{11}$ | $U_{22}$ | $U_{33}$ | $U_{23}$ | $U_{13}$ | $U_{12}$ |
|------|----------|----------|----------|----------|----------|----------|
| C43  | 44(2)    | 45(3)    | 33(2)    | -6.1(18) | 3.4(18)  | 2.9(19)  |
| C45  | 44(2)    | 58(3)    | 42(2)    | -8(2)    | -1(2)    | 9(2)     |
| C58  | 37(2)    | 49(3)    | 44(2)    | -4(2)    | 1.0(19)  | -4.3(19) |
| C46  | 51(3)    | 47(3)    | 40(2)    | -5(2)    | 0(2)     | 5(2)     |
| C48  | 55(3)    | 47(3)    | 45(3)    | 2(2)     | -5(2)    | 1(2)     |
| C49  | 72(3)    | 53(3)    | 44(3)    | -3(2)    | -9(2)    | -5(2)    |
| C50  | 85(3)    | 43(3)    | 57(3)    | -5(2)    | -5(3)    | 1(2)     |
| C51  | 64(3)    | 52(3)    | 51(3)    | -4(2)    | 0(2)     | 16(2)    |
| C52  | 82(4)    | 53(3)    | 91(4)    | -1(3)    | -18(3)   | 22(3)    |
| C53  | 75(4)    | 72(4)    | 97(4)    | -2(3)    | -22(3)   | 36(3)    |
| C54  | 55(3)    | 69(3)    | 55(3)    | -9(2)    | -11(2)   | 21(2)    |
| C55  | 49(3)    | 95(4)    | 62(3)    | -15(3)   | -11(2)   | 15(3)    |
| C56  | 45(3)    | 89(4)    | 57(3)    | -14(3)   | -7(2)    | 1(3)     |
| C57  | 52(3)    | 68(3)    | 48(3)    | -6(2)    | -1(2)    | 5(2)     |
| C59  | 50(2)    | 45(3)    | 40(2)    | 0(2)     | 3.9(19)  | -1(2)    |
| C60  | 55(3)    | 45(3)    | 45(3)    | -2(2)    | 1(2)     | 1(2)     |
| C61  | 54(3)    | 44(3)    | 48(3)    | 3(2)     | -8(2)    | -9(2)    |
| C62  | 69(3)    | 69(3)    | 45(3)    | 7(2)     | 12(2)    | -23(3)   |
| C63  | 61(3)    | 59(3)    | 54(3)    | -1(2)    | 17(2)    | -7(2)    |
| C64  | 86(3)    | 60(3)    | 77(3)    | 16(3)    | -11(3)   | -9(3)    |

**Table 4 Bond Lengths for  $\text{C}_{32}\text{H}_{21}\text{NO}_2$  (5b).**

| Atom | Atom | Length/ $\text{\AA}$ | Atom | Atom | Length/ $\text{\AA}$ |
|------|------|----------------------|------|------|----------------------|
| O1   | C1   | 1.210(4)             | O3   | C33  | 1.219(4)             |
| O2   | C2   | 1.214(4)             | O4   | C34  | 1.217(4)             |
| N1   | C1   | 1.405(5)             | N2   | C33  | 1.389(5)             |
| N1   | C2   | 1.398(4)             | N2   | C34  | 1.399(5)             |
| N1   | C9   | 1.473(4)             | N2   | C41  | 1.466(4)             |
| C1   | C4   | 1.486(5)             | C33  | C36  | 1.489(5)             |
| C2   | C3   | 1.481(5)             | C34  | C35  | 1.483(5)             |
| C3   | C4   | 1.381(5)             | C35  | C36  | 1.382(5)             |
| C3   | C8   | 1.378(5)             | C35  | C40  | 1.381(5)             |
| C4   | C5   | 1.366(5)             | C36  | C37  | 1.373(5)             |

**Table 4 Bond Lengths for C<sub>32</sub>H<sub>21</sub>NO<sub>2</sub> (5b).**

| Atom | Atom | Length/Å | Atom | Atom | Length/Å |
|------|------|----------|------|------|----------|
| C5   | C6   | 1.394(5) | C37  | C38  | 1.384(6) |
| C6   | C7   | 1.388(5) | C38  | C39  | 1.391(6) |
| C7   | C8   | 1.391(5) | C39  | C40  | 1.385(6) |
| C9   | C10  | 1.515(5) | C41  | C42  | 1.522(5) |
| C10  | C11  | 1.365(5) | C44  | C43  | 1.454(5) |
| C10  | C15  | 1.458(5) | C44  | C45  | 1.414(5) |
| C11  | C12  | 1.449(5) | C44  | C57  | 1.403(5) |
| C11  | C26  | 1.508(5) | C42  | C47  | 1.441(5) |
| C12  | C13  | 1.431(5) | C42  | C43  | 1.369(5) |
| C12  | C25  | 1.391(5) | C47  | C46  | 1.427(5) |
| C13  | C14  | 1.422(5) | C47  | C48  | 1.392(5) |
| C13  | C22  | 1.415(5) | C43  | C58  | 1.496(5) |
| C14  | C15  | 1.415(5) | C45  | C46  | 1.419(5) |
| C14  | C19  | 1.417(5) | C45  | C54  | 1.429(5) |
| C15  | C16  | 1.389(5) | C58  | C59  | 1.383(5) |
| C16  | C17  | 1.382(5) | C58  | C63  | 1.384(5) |
| C17  | C18  | 1.371(6) | C46  | C51  | 1.420(5) |
| C18  | C19  | 1.393(6) | C48  | C49  | 1.384(5) |
| C19  | C20  | 1.423(5) | C49  | C50  | 1.374(5) |
| C20  | C21  | 1.346(6) | C50  | C51  | 1.388(5) |
| C21  | C22  | 1.431(6) | C51  | C52  | 1.429(5) |
| C22  | C23  | 1.400(6) | C52  | C53  | 1.353(6) |
| C23  | C24  | 1.376(6) | C53  | C54  | 1.427(6) |
| C24  | C25  | 1.386(5) | C54  | C55  | 1.400(6) |
| C26  | C27  | 1.380(5) | C55  | C56  | 1.378(6) |
| C26  | C31  | 1.393(5) | C56  | C57  | 1.378(5) |
| C27  | C28  | 1.386(5) | C59  | C60  | 1.377(5) |
| C28  | C29  | 1.385(5) | C60  | C61  | 1.371(5) |
| C29  | C30  | 1.379(6) | C61  | C62  | 1.380(5) |
| C29  | C32  | 1.511(5) | C61  | C64  | 1.512(5) |
| C30  | C31  | 1.384(6) | C62  | C63  | 1.374(5) |

**Table 5 Bond Angles for C<sub>32</sub>H<sub>21</sub>NO<sub>2</sub> (5b).**

| Atom | Atom | Atom | Angle/°  | Atom | Atom | Atom | Angle/°  |
|------|------|------|----------|------|------|------|----------|
| C1   | N1   | C9   | 124.6(3) | C33  | N2   | C34  | 111.3(3) |
| C2   | N1   | C1   | 110.4(3) | C33  | N2   | C41  | 124.6(3) |
| C2   | N1   | C9   | 124.4(3) | C34  | N2   | C41  | 123.7(3) |
| O1   | C1   | N1   | 124.6(4) | O3   | C33  | N2   | 125.2(4) |
| O1   | C1   | C4   | 129.0(4) | O3   | C33  | C36  | 128.3(4) |
| N1   | C1   | C4   | 106.5(3) | N2   | C33  | C36  | 106.5(3) |
| O2   | C2   | N1   | 124.4(3) | O4   | C34  | N2   | 123.6(4) |
| O2   | C2   | C3   | 128.7(4) | O4   | C34  | C35  | 130.4(4) |
| N1   | C2   | C3   | 106.9(3) | N2   | C34  | C35  | 106.0(3) |
| C4   | C3   | C2   | 108.1(3) | C36  | C35  | C34  | 108.5(3) |
| C8   | C3   | C2   | 129.8(4) | C40  | C35  | C34  | 130.2(4) |
| C8   | C3   | C4   | 122.1(4) | C40  | C35  | C36  | 121.3(4) |
| C3   | C4   | C1   | 108.0(3) | C35  | C36  | C33  | 107.6(3) |
| C5   | C4   | C1   | 130.6(4) | C37  | C36  | C33  | 130.2(4) |
| C5   | C4   | C3   | 121.4(3) | C37  | C36  | C35  | 122.2(4) |
| C4   | C5   | C6   | 117.6(4) | C36  | C37  | C38  | 116.7(4) |
| C7   | C6   | C5   | 120.7(4) | C37  | C38  | C39  | 121.7(4) |
| C6   | C7   | C8   | 121.4(4) | C40  | C39  | C38  | 121.0(4) |
| C3   | C8   | C7   | 116.7(4) | C35  | C40  | C39  | 117.1(4) |
| N1   | C9   | C10  | 113.4(3) | N2   | C41  | C42  | 113.8(3) |
| C11  | C10  | C9   | 119.8(3) | C45  | C44  | C43  | 119.2(3) |
| C11  | C10  | C15  | 121.3(3) | C57  | C44  | C43  | 122.1(4) |
| C15  | C10  | C9   | 118.9(3) | C57  | C44  | C45  | 118.7(4) |
| C10  | C11  | C12  | 120.7(3) | C47  | C42  | C41  | 119.0(3) |
| C10  | C11  | C26  | 122.2(3) | C43  | C42  | C41  | 119.2(3) |
| C12  | C11  | C26  | 117.0(3) | C43  | C42  | C47  | 121.8(3) |
| C13  | C12  | C11  | 118.6(3) | C46  | C47  | C42  | 118.7(3) |
| C25  | C12  | C11  | 123.3(4) | C48  | C47  | C42  | 123.4(3) |
| C25  | C12  | C13  | 118.1(4) | C48  | C47  | C46  | 117.8(4) |
| C14  | C13  | C12  | 120.1(3) | C44  | C43  | C58  | 117.7(3) |
| C22  | C13  | C12  | 119.9(4) | C42  | C43  | C44  | 119.7(3) |
| C22  | C13  | C14  | 120.0(4) | C42  | C43  | C58  | 122.6(3) |
| C15  | C14  | C13  | 120.8(4) | C44  | C45  | C46  | 120.8(3) |
| C15  | C14  | C19  | 119.6(4) | C44  | C45  | C54  | 119.5(4) |
| C19  | C14  | C13  | 119.7(4) | C46  | C45  | C54  | 119.6(4) |

**Table 5 Bond Angles for C<sub>32</sub>H<sub>21</sub>NO<sub>2</sub> (5b).**

| Atom | Atom | Atom | Angle/°  | Atom | Atom | Atom | Angle/°  |
|------|------|------|----------|------|------|------|----------|
| C14  | C15  | C10  | 118.2(3) | C59  | C58  | C43  | 120.0(3) |
| C16  | C15  | C10  | 122.5(3) | C59  | C58  | C63  | 117.7(4) |
| C16  | C15  | C14  | 119.2(3) | C63  | C58  | C43  | 122.3(4) |
| C17  | C16  | C15  | 120.4(4) | C45  | C46  | C47  | 119.7(4) |
| C18  | C17  | C16  | 121.1(4) | C45  | C46  | C51  | 120.5(4) |
| C17  | C18  | C19  | 120.5(4) | C51  | C46  | C47  | 119.8(4) |
| C14  | C19  | C20  | 118.9(4) | C49  | C48  | C47  | 121.8(4) |
| C18  | C19  | C14  | 119.2(4) | C50  | C49  | C48  | 120.3(4) |
| C18  | C19  | C20  | 121.9(4) | C49  | C50  | C51  | 120.9(4) |
| C21  | C20  | C19  | 121.4(4) | C46  | C51  | C52  | 118.5(4) |
| C20  | C21  | C22  | 121.3(4) | C50  | C51  | C46  | 119.3(4) |
| C13  | C22  | C21  | 118.6(4) | C50  | C51  | C52  | 122.1(4) |
| C23  | C22  | C13  | 119.6(4) | C53  | C52  | C51  | 121.1(4) |
| C23  | C22  | C21  | 121.8(4) | C52  | C53  | C54  | 122.0(4) |
| C24  | C23  | C22  | 119.9(4) | C53  | C54  | C45  | 118.3(4) |
| C23  | C24  | C25  | 121.2(4) | C55  | C54  | C45  | 119.1(4) |
| C24  | C25  | C12  | 121.3(4) | C55  | C54  | C53  | 122.7(4) |
| C27  | C26  | C11  | 118.5(4) | C56  | C55  | C54  | 120.9(4) |
| C27  | C26  | C31  | 118.0(4) | C55  | C56  | C57  | 120.3(4) |
| C31  | C26  | C11  | 123.5(4) | C56  | C57  | C44  | 121.5(4) |
| C26  | C27  | C28  | 121.0(4) | C60  | C59  | C58  | 121.4(4) |
| C29  | C28  | C27  | 121.4(4) | C61  | C60  | C59  | 121.0(4) |
| C28  | C29  | C32  | 120.8(4) | C60  | C61  | C62  | 117.5(4) |
| C30  | C29  | C28  | 117.2(4) | C60  | C61  | C64  | 120.8(4) |
| C30  | C29  | C32  | 122.0(4) | C62  | C61  | C64  | 121.7(4) |
| C29  | C30  | C31  | 122.1(4) | C63  | C62  | C61  | 122.3(4) |
| C30  | C31  | C26  | 120.3(4) | C62  | C63  | C58  | 120.1(4) |

**Table 6 Torsion Angles for C<sub>32</sub>H<sub>21</sub>NO<sub>2</sub> (5b).**

| A  | B  | C  | D  | Angle/°   | A  | B   | C   | D   | Angle/°   |
|----|----|----|----|-----------|----|-----|-----|-----|-----------|
| O1 | C1 | C4 | C3 | -176.0(4) | O3 | C33 | C36 | C35 | -176.0(4) |
| O1 | C1 | C4 | C5 | 3.7(7)    | O3 | C33 | C36 | C37 | 3.2(7)    |
| O2 | C2 | C3 | C4 | -179.9(4) | O4 | C34 | C35 | C36 | 179.5(4)  |
| O2 | C2 | C3 | C8 | -0.3(6)   | O4 | C34 | C35 | C40 | -1.7(7)   |

**Table 6 Torsion Angles for C<sub>32</sub>H<sub>21</sub>NO<sub>2</sub> (5b).**

| A   | B   | C   | D   | Angle/°   | A   | B   | C   | D   | Angle/°   |
|-----|-----|-----|-----|-----------|-----|-----|-----|-----|-----------|
| N1  | C1  | C4  | C3  | 2.9(4)    | N2  | C33 | C36 | C35 | 3.3(4)    |
| N1  | C1  | C4  | C5  | -177.4(4) | N2  | C33 | C36 | C37 | -177.5(4) |
| N1  | C2  | C3  | C4  | -0.1(4)   | N2  | C34 | C35 | C36 | -0.9(4)   |
| N1  | C2  | C3  | C8  | 179.5(3)  | N2  | C34 | C35 | C40 | 177.9(4)  |
| N1  | C9  | C10 | C11 | 109.8(4)  | N2  | C41 | C42 | C47 | -64.2(4)  |
| N1  | C9  | C10 | C15 | -70.4(4)  | N2  | C41 | C42 | C43 | 116.1(4)  |
| C1  | N1  | C2  | O2  | -178.2(3) | C33 | N2  | C34 | O4  | -177.3(4) |
| C1  | N1  | C2  | C3  | 2.0(4)    | C33 | N2  | C34 | C35 | 3.1(4)    |
| C1  | N1  | C9  | C10 | -65.0(4)  | C33 | N2  | C41 | C42 | -58.7(5)  |
| C1  | C4  | C5  | C6  | -179.3(4) | C33 | C36 | C37 | C38 | 179.3(4)  |
| C2  | N1  | C1  | O1  | 176.0(3)  | C34 | N2  | C33 | O3  | 175.4(4)  |
| C2  | N1  | C1  | C4  | -3.0(4)   | C34 | N2  | C33 | C36 | -4.0(4)   |
| C2  | N1  | C9  | C10 | 124.9(4)  | C34 | N2  | C41 | C42 | 129.7(4)  |
| C2  | C3  | C4  | C1  | -1.7(4)   | C34 | C35 | C36 | C33 | -1.4(4)   |
| C2  | C3  | C4  | C5  | 178.5(3)  | C34 | C35 | C36 | C37 | 179.3(3)  |
| C2  | C3  | C8  | C7  | -178.1(3) | C34 | C35 | C40 | C39 | -177.7(4) |
| C3  | C4  | C5  | C6  | 0.4(5)    | C35 | C36 | C37 | C38 | -1.6(6)   |
| C4  | C3  | C8  | C7  | 1.4(5)    | C36 | C35 | C40 | C39 | 1.0(5)    |
| C4  | C5  | C6  | C7  | -0.1(6)   | C36 | C37 | C38 | C39 | 1.4(6)    |
| C5  | C6  | C7  | C8  | 0.4(6)    | C37 | C38 | C39 | C40 | -0.1(6)   |
| C6  | C7  | C8  | C3  | -1.1(5)   | C38 | C39 | C40 | C35 | -1.1(6)   |
| C8  | C3  | C4  | C1  | 178.6(3)  | C40 | C35 | C36 | C33 | 179.7(3)  |
| C8  | C3  | C4  | C5  | -1.1(5)   | C40 | C35 | C36 | C37 | 0.4(6)    |
| C9  | N1  | C1  | O1  | 4.7(6)    | C41 | N2  | C33 | O3  | 2.9(6)    |
| C9  | N1  | C1  | C4  | -174.3(3) | C41 | N2  | C33 | C36 | -176.4(3) |
| C9  | N1  | C2  | O2  | -6.9(6)   | C41 | N2  | C34 | O4  | -4.7(6)   |
| C9  | N1  | C2  | C3  | 173.3(3)  | C41 | N2  | C34 | C35 | 175.7(3)  |
| C9  | C10 | C11 | C12 | -173.5(3) | C41 | C42 | C47 | C46 | 179.4(3)  |
| C9  | C10 | C11 | C26 | 9.7(5)    | C41 | C42 | C47 | C48 | -0.5(5)   |
| C9  | C10 | C15 | C14 | 176.1(3)  | C41 | C42 | C43 | C44 | -179.4(3) |
| C9  | C10 | C15 | C16 | -6.9(5)   | C41 | C42 | C43 | C58 | 2.2(5)    |
| C10 | C11 | C12 | C13 | -3.9(5)   | C44 | C43 | C58 | C59 | -100.1(4) |
| C10 | C11 | C12 | C25 | 175.2(4)  | C44 | C43 | C58 | C63 | 77.5(5)   |
| C10 | C11 | C26 | C27 | 73.5(5)   | C44 | C45 | C46 | C47 | 0.5(6)    |
| C10 | C11 | C26 | C31 | -109.5(4) | C44 | C45 | C46 | C51 | -179.1(4) |

**Table 6 Torsion Angles for C<sub>32</sub>H<sub>21</sub>NO<sub>2</sub> (5b).**

| A   | B   | C   | D   | Angle/°   | A   | B   | C   | D   | Angle/°   |
|-----|-----|-----|-----|-----------|-----|-----|-----|-----|-----------|
| C10 | C15 | C16 | C17 | -178.3(4) | C44 | C45 | C54 | C53 | 178.7(4)  |
| C11 | C10 | C15 | C14 | -4.2(5)   | C44 | C45 | C54 | C55 | -1.4(6)   |
| C11 | C10 | C15 | C16 | 172.8(4)  | C42 | C47 | C46 | C45 | 0.2(5)    |
| C11 | C12 | C13 | C14 | -1.5(5)   | C42 | C47 | C46 | C51 | 179.8(3)  |
| C11 | C12 | C13 | C22 | -179.9(3) | C42 | C47 | C48 | C49 | 178.1(4)  |
| C11 | C12 | C25 | C24 | -177.7(4) | C42 | C43 | C58 | C59 | 78.3(5)   |
| C11 | C26 | C27 | C28 | 176.4(3)  | C42 | C43 | C58 | C63 | -104.1(4) |
| C11 | C26 | C31 | C30 | -176.3(4) | C47 | C42 | C43 | C44 | 0.9(5)    |
| C12 | C11 | C26 | C27 | -103.3(4) | C47 | C42 | C43 | C58 | -177.4(3) |
| C12 | C11 | C26 | C31 | 73.6(5)   | C47 | C46 | C51 | C50 | 2.3(6)    |
| C12 | C13 | C14 | C15 | 4.0(5)    | C47 | C46 | C51 | C52 | -179.6(4) |
| C12 | C13 | C14 | C19 | -177.2(3) | C47 | C48 | C49 | C50 | 1.9(6)    |
| C12 | C13 | C22 | C21 | 178.2(4)  | C43 | C44 | C45 | C46 | -0.6(5)   |
| C12 | C13 | C22 | C23 | -2.8(6)   | C43 | C44 | C45 | C54 | 179.7(3)  |
| C13 | C12 | C25 | C24 | 1.4(6)    | C43 | C44 | C57 | C56 | -179.0(4) |
| C13 | C14 | C15 | C10 | -1.3(5)   | C43 | C42 | C47 | C46 | -0.9(5)   |
| C13 | C14 | C15 | C16 | -178.4(3) | C43 | C42 | C47 | C48 | 179.1(4)  |
| C13 | C14 | C19 | C18 | 179.1(4)  | C43 | C58 | C59 | C60 | 178.0(3)  |
| C13 | C14 | C19 | C20 | -1.4(5)   | C43 | C58 | C63 | C62 | -177.7(4) |
| C13 | C22 | C23 | C24 | 2.3(6)    | C45 | C44 | C43 | C42 | -0.2(5)   |
| C14 | C13 | C22 | C21 | -0.3(6)   | C45 | C44 | C43 | C58 | 178.3(3)  |
| C14 | C13 | C22 | C23 | 178.8(4)  | C45 | C44 | C57 | C56 | 0.6(6)    |
| C14 | C15 | C16 | C17 | -1.3(6)   | C45 | C46 | C51 | C50 | -178.1(4) |
| C14 | C19 | C20 | C21 | 0.7(6)    | C45 | C46 | C51 | C52 | 0.0(6)    |
| C15 | C10 | C11 | C12 | 6.8(5)    | C45 | C54 | C55 | C56 | 1.9(6)    |
| C15 | C10 | C11 | C26 | -170.0(3) | C58 | C59 | C60 | C61 | -0.6(6)   |
| C15 | C14 | C19 | C18 | -2.1(5)   | C46 | C47 | C48 | C49 | -1.8(6)   |
| C15 | C14 | C19 | C20 | 177.4(3)  | C46 | C45 | C54 | C53 | -1.0(6)   |
| C15 | C16 | C17 | C18 | -0.9(6)   | C46 | C45 | C54 | C55 | 178.9(4)  |
| C16 | C17 | C18 | C19 | 1.6(7)    | C46 | C51 | C52 | C53 | -0.4(7)   |
| C17 | C18 | C19 | C14 | -0.1(6)   | C48 | C47 | C46 | C45 | -179.9(3) |
| C17 | C18 | C19 | C20 | -179.6(4) | C48 | C47 | C46 | C51 | -0.2(5)   |
| C18 | C19 | C20 | C21 | -179.9(4) | C48 | C49 | C50 | C51 | 0.2(6)    |
| C19 | C14 | C15 | C10 | 179.9(3)  | C49 | C50 | C51 | C46 | -2.3(6)   |
| C19 | C14 | C15 | C16 | 2.8(5)    | C49 | C50 | C51 | C52 | 179.7(4)  |

**Table 6 Torsion Angles for C<sub>32</sub>H<sub>21</sub>NO<sub>2</sub> (5b).**

| A   | B   | C   | D   | Angle/°   | A   | B   | C   | D   | Angle/°   |
|-----|-----|-----|-----|-----------|-----|-----|-----|-----|-----------|
| C19 | C20 | C21 | C22 | 0.3(7)    | C50 | C51 | C52 | C53 | 177.7(5)  |
| C20 | C21 | C22 | C13 | -0.5(6)   | C51 | C52 | C53 | C54 | 0.0(8)    |
| C20 | C21 | C22 | C23 | -179.6(4) | C52 | C53 | C54 | C45 | 0.7(7)    |
| C21 | C22 | C23 | C24 | -178.6(4) | C52 | C53 | C54 | C55 | -179.2(5) |
| C22 | C13 | C14 | C15 | -177.6(3) | C53 | C54 | C55 | C56 | -178.2(4) |
| C22 | C13 | C14 | C19 | 1.3(5)    | C54 | C45 | C46 | C47 | -179.7(3) |
| C22 | C23 | C24 | C25 | 0.0(7)    | C54 | C45 | C46 | C51 | 0.7(6)    |
| C23 | C24 | C25 | C12 | -1.9(7)   | C54 | C55 | C56 | C57 | -1.3(7)   |
| C25 | C12 | C13 | C14 | 179.3(4)  | C55 | C56 | C57 | C44 | 0.0(6)    |
| C25 | C12 | C13 | C22 | 0.9(5)    | C57 | C44 | C43 | C42 | 179.4(4)  |
| C26 | C11 | C12 | C13 | 173.0(3)  | C57 | C44 | C43 | C58 | -2.2(5)   |
| C26 | C11 | C12 | C25 | -7.8(5)   | C57 | C44 | C45 | C46 | 179.9(4)  |
| C26 | C27 | C28 | C29 | 0.1(6)    | C57 | C44 | C45 | C54 | 0.1(5)    |
| C27 | C26 | C31 | C30 | 0.6(6)    | C59 | C58 | C63 | C62 | 0.0(6)    |
| C27 | C28 | C29 | C30 | 0.5(6)    | C59 | C60 | C61 | C62 | 0.8(6)    |
| C27 | C28 | C29 | C32 | -179.0(4) | C59 | C60 | C61 | C64 | -179.6(4) |
| C28 | C29 | C30 | C31 | -0.6(6)   | C60 | C61 | C62 | C63 | -0.5(6)   |
| C29 | C30 | C31 | C26 | 0.0(6)    | C61 | C62 | C63 | C58 | 0.1(6)    |
| C31 | C26 | C27 | C28 | -0.7(6)   | C63 | C58 | C59 | C60 | 0.2(5)    |
| C32 | C29 | C30 | C31 | 179.0(4)  | C64 | C61 | C62 | C63 | 179.9(4)  |

**Table 7 Hydrogen Atom Coordinates (Å×10<sup>4</sup>) and Isotropic Displacement Parameters (Å<sup>2</sup>×10<sup>3</sup>) for C<sub>32</sub>H<sub>21</sub>NO<sub>2</sub> (5b).**

| Atom | x       | y        | z       | U(eq) |
|------|---------|----------|---------|-------|
| H5   | 2417.11 | 8219.93  | 6560.12 | 60    |
| H6   | 1705.05 | 8767.83  | 6351.51 | 67    |
| H7   | 1495.74 | 9326.25  | 5326.74 | 63    |
| H8   | 1985.35 | 9334.17  | 4471.65 | 56    |
| H9A  | 3645    | 8289.91  | 4271.57 | 53    |
| H9B  | 3674.69 | 7456.5   | 4766.92 | 53    |
| H16  | 3621.75 | 9796.59  | 4308.49 | 60    |
| H17  | 3763.81 | 11339.24 | 4180.86 | 76    |
| H18  | 4297.07 | 12059.38 | 4816.22 | 76    |
| H20  | 4890.26 | 11989.47 | 5674.87 | 80    |



**Table 7 Hydrogen Atom Coordinates ( $\text{\AA}\times 10^4$ ) and Isotropic Displacement Parameters ( $\text{\AA}^2\times 10^3$ ) for  $\text{C}_{32}\text{H}_{21}\text{NO}_2$  (5b).**

| Atom | <i>x</i> | <i>y</i> | <i>z</i> | U(eq) |
|------|----------|----------|----------|-------|
| H21  | 5306.01  | 11174.06 | 6408.8   | 83    |
| H23  | 5495.46  | 9691.78  | 6954.71  | 89    |
| H24  | 5392.11  | 8131.54  | 7040.28  | 86    |
| H25  | 4879.36  | 7382.68  | 6377.08  | 72    |
| H27  | 4536.99  | 6881.11  | 4615.56  | 59    |
| H28  | 4560.21  | 5301.5   | 4614.62  | 67    |
| H30  | 4045.23  | 5257.96  | 6382.75  | 76    |
| H31  | 4020.26  | 6836.49  | 6393.5   | 68    |
| H32A | 4122.39  | 3830.77  | 5173.32  | 113   |
| H32B | 4262.63  | 3838.51  | 5928.38  | 113   |
| H32C | 4623.59  | 3879.06  | 5394.06  | 113   |
| H37  | 3280.81  | 6580.56  | -674.41  | 66    |
| H38  | 2789.75  | 6055.72  | -1494.98 | 79    |
| H39  | 2076.12  | 5696.79  | -1265.99 | 75    |
| H40  | 1828.56  | 5844.03  | -202.04  | 63    |
| H41A | 2600.72  | 6771.17  | 2092.7   | 55    |
| H41B | 2909.53  | 7573.61  | 1872.06  | 55    |
| H48  | 2631.13  | 5198.13  | 1858.36  | 59    |
| H49  | 2641.44  | 3622.71  | 1955.75  | 68    |
| H50  | 3239.46  | 2889.91  | 2435.07  | 74    |
| H52  | 3975.46  | 2953.58  | 2990.42  | 91    |
| H53  | 4571.08  | 3778.15  | 3329.17  | 98    |
| H55  | 4964.5   | 5275.05  | 3434.02  | 83    |
| H56  | 4963.42  | 6849.27  | 3328.23  | 77    |
| H57  | 4364.05  | 7594.42  | 2863.79  | 67    |
| H59  | 3245.53  | 8194.93  | 3102.75  | 54    |
| H60  | 3272.19  | 9767.78  | 3065.44  | 58    |
| H62  | 4031.06  | 9627.81  | 1525.74  | 73    |
| H63  | 4004.56  | 8056.36  | 1549.5   | 69    |
| H64A | 3408.3   | 11141.38 | 2081.09  | 112   |
| H64B | 3921.95  | 11093.6  | 2020.08  | 112   |
| H64C | 3718.21  | 11136.96 | 2720.75  | 112   |

## 7. Reference

1. Savelli, C.; Salvio, R., Guanidine-based polymer brushes grafted onto silica nanoparticles as efficient artificial phosphodiesterases. *Chem. Eur. J.*, 2015, **21**, 5856-63.
2. Mio, M. J.; Kopel, L. C.; Braun, J. B.; Gadzikwa, T. L.; Hull, K. L.; Brisbois, R. G.; Markworth, C. J.; Grieco, P. A., One-pot synthesis of symmetrical and unsymmetrical bisarylethynes by a modification of the sonogashira coupling reaction. *Org. Lett.*, 2002, **4**, 3199-202.
3. Zhukhovitskiy, A. V.; Kobylanskiy, I. J.; Wu, C. Y.; Toste, F. D., Migratory Insertion of Carbenes into Au(III)-C Bonds. *J. Am. Chem. Soc.*, 2018, **140**, 466-474.
4. Rusali, L. E.; Schramm, M. P., Au-Cavitands: Size governed arene-alkyne cycloisomerization. *Tetrahedron Lett.*, 2020, **61**, 152333.
5. Badri, R.; Shushizadeh, M. R., A New Method for the Oxybromination of Aromatic Compounds with Copper(II)bromide and Potassium Dichromate. *Phosphorus, Sulfur, and Silicon*, 2005, **180**, 533-536.
6. Umeda, R.; Ueda, R.; Tanaka, T.; Hayashi, A.; Ikeshita, M.; Suzuki, S.; Naota, T.; Nishiyama, Y., Selective synthesis of 1-halonaphthalenes by copper-catalyzed benzannulation. *Tetrahedron*, 2021, **79**, 131872.
7. Tian, T.; Wang, X.; Lv, L.; Li, Z., Iron-Catalyzed [2+2+2] Annulation of Aliphatic Bridged 1,n -Enynes with Aldehydes for the Synthesis of Fused Pyrans. *Eur. J. Org. Chem.*, 2020, 4425-4428.
8. Keller, F.; Rippert, A. J., New, Axially Chiral, Bimetallic Catalysts for Asymmetric Alkylation of Aldehydes with Diethylzinc. *Helv. Chim. Acta.*, 1999, **82**, 125-137.
9. Sasaki, H.; Akioka, I.; Imoto, H.; Naka, K., Arsenic-Bridged Silafluorene and Germafluorene as a Novel Class of Mixed-Heteroatom-Bridged Heterofluorenes. *Eur. J. Org. Chem.*, 2021, 1390-1395.
10. Dolomanov, O. V.; Bourhis, L. J.; Gildea, R. J.; Howard, J. A. K.; Puschmann, H., OLEX2: a complete structure solution, refinement and analysis program. *J. Appl. Cryst.*, 2009, **42**, 339-341.
11. Sheldrick, G. M., SHELXT - integrated space-group and crystal-structure determination. *Acta. Cryst.*, 2015, **71**, 3-8.

## 8. NMR spectra

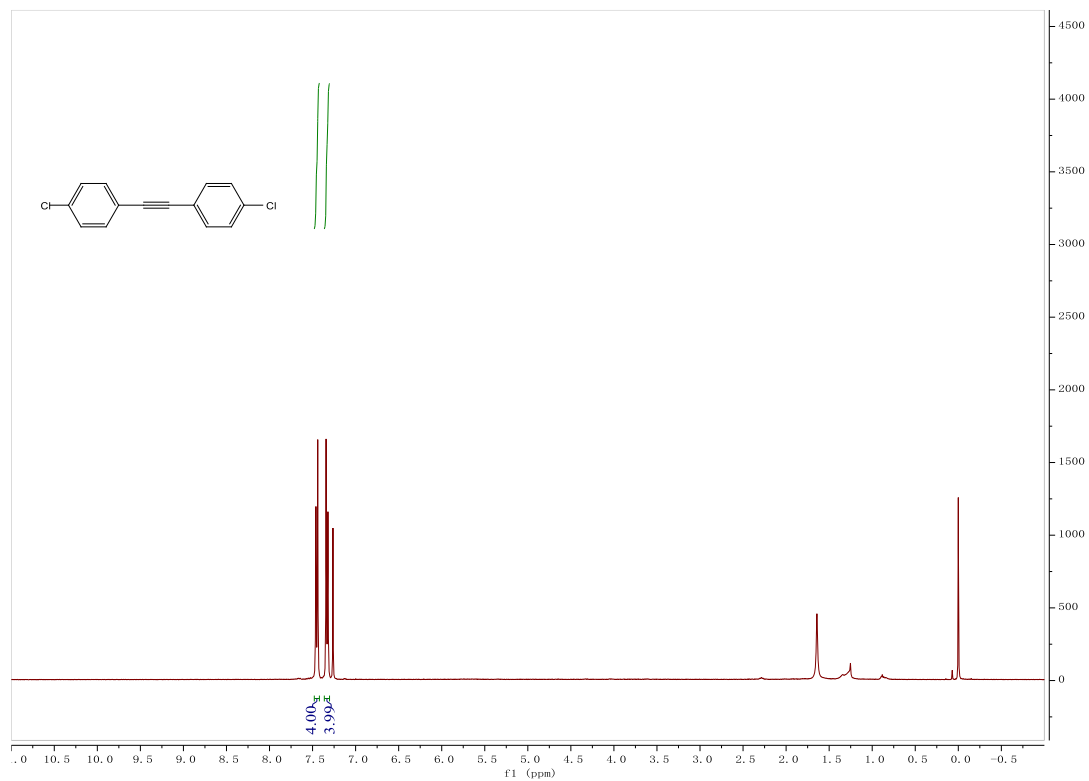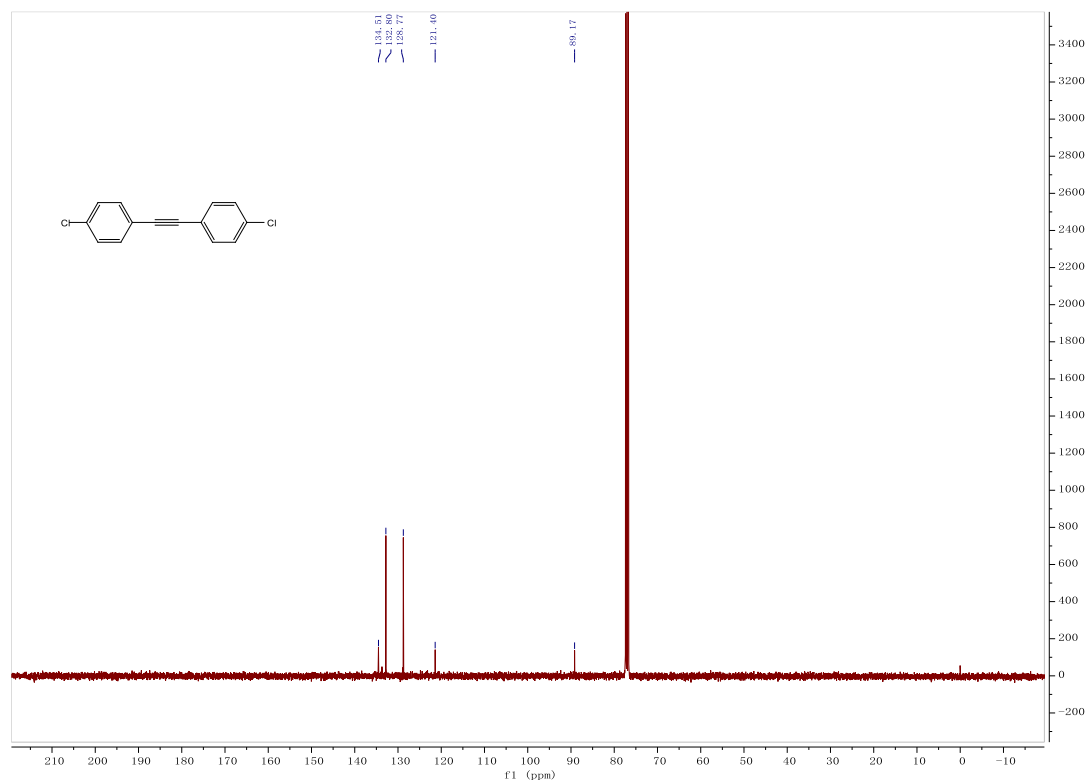

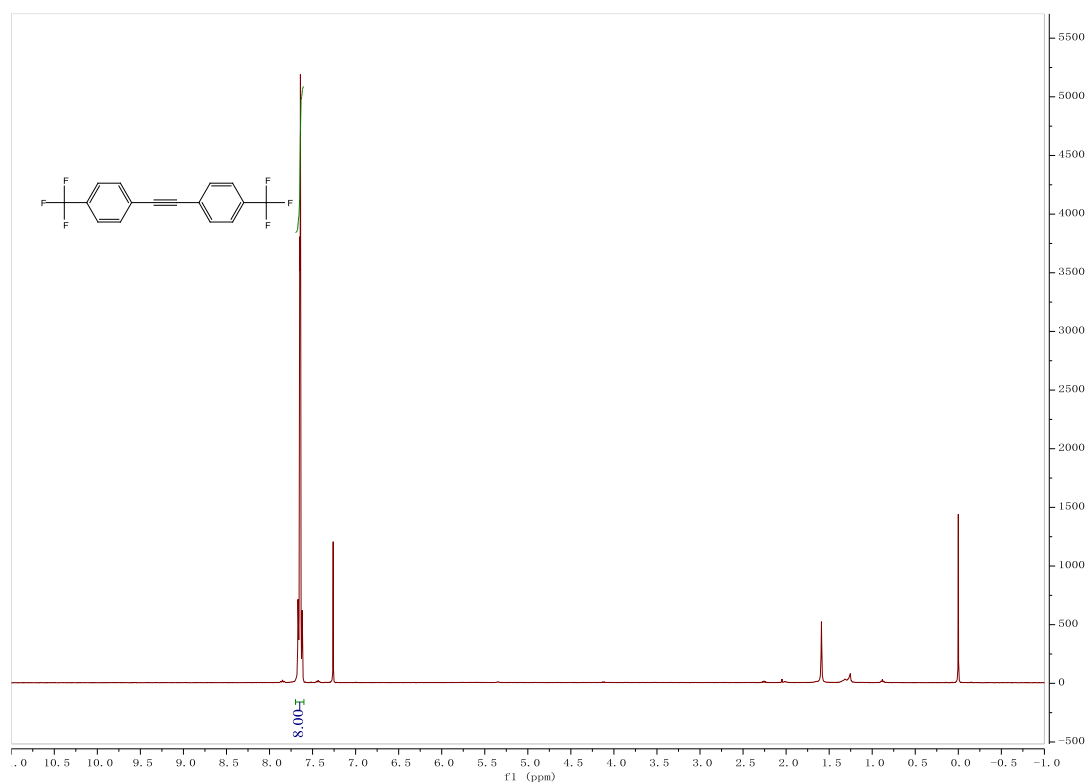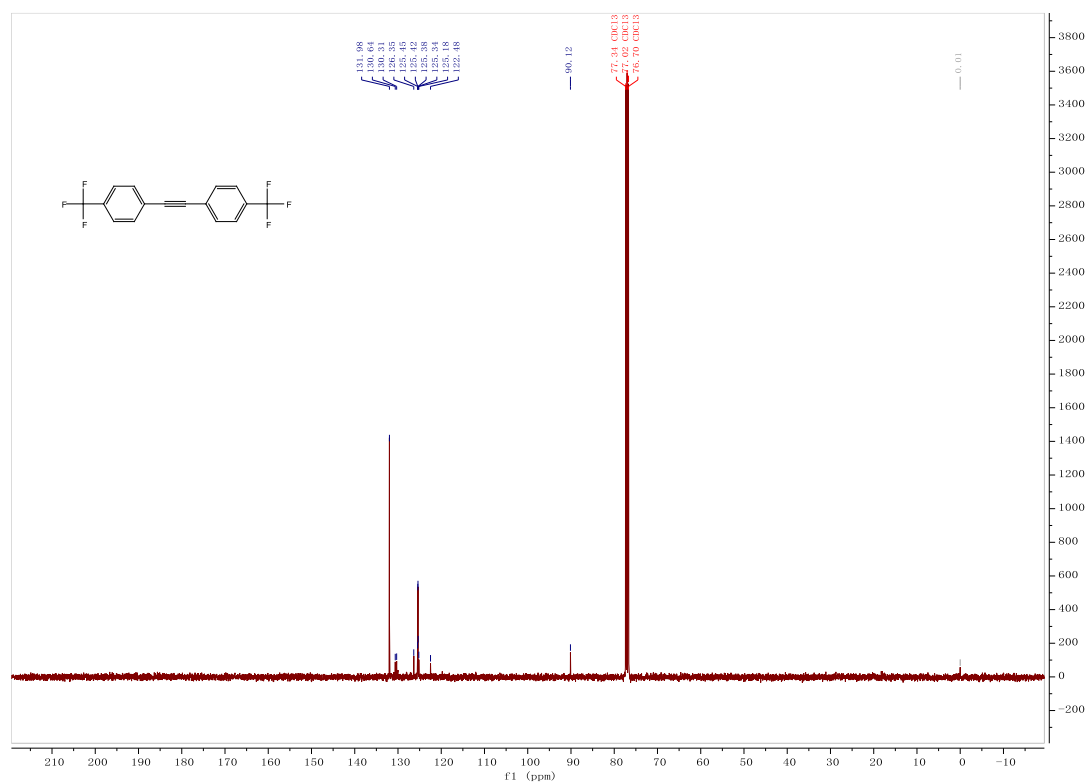

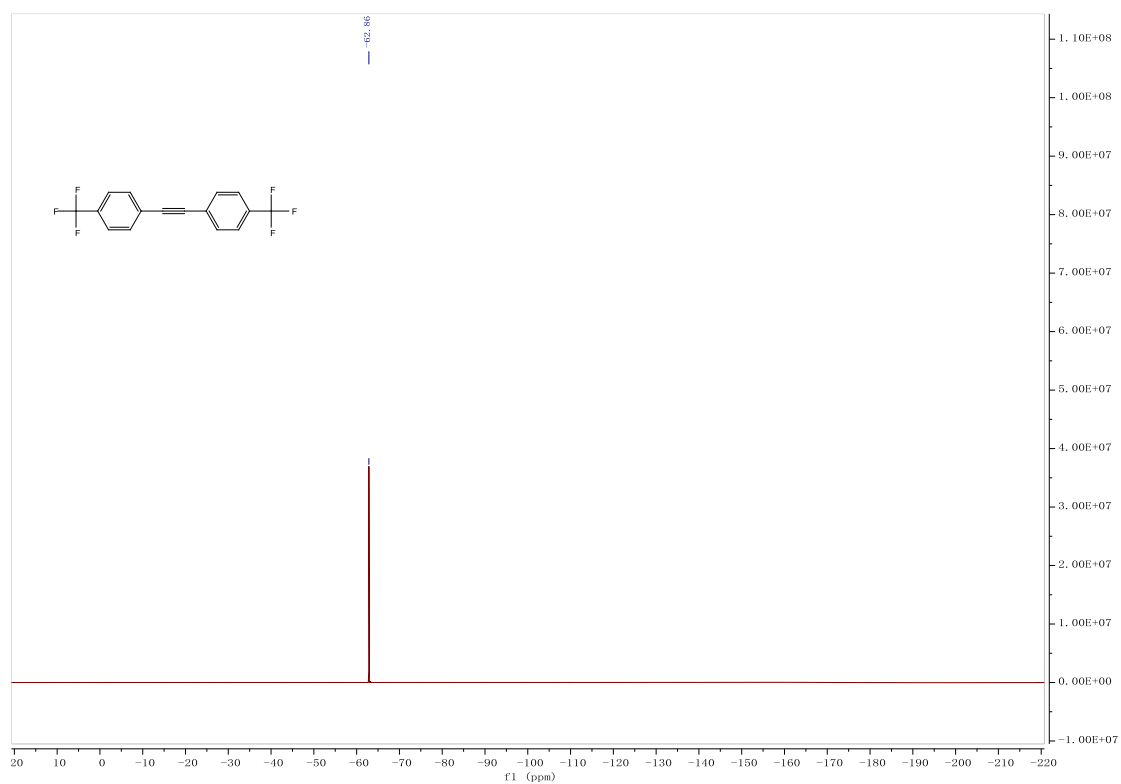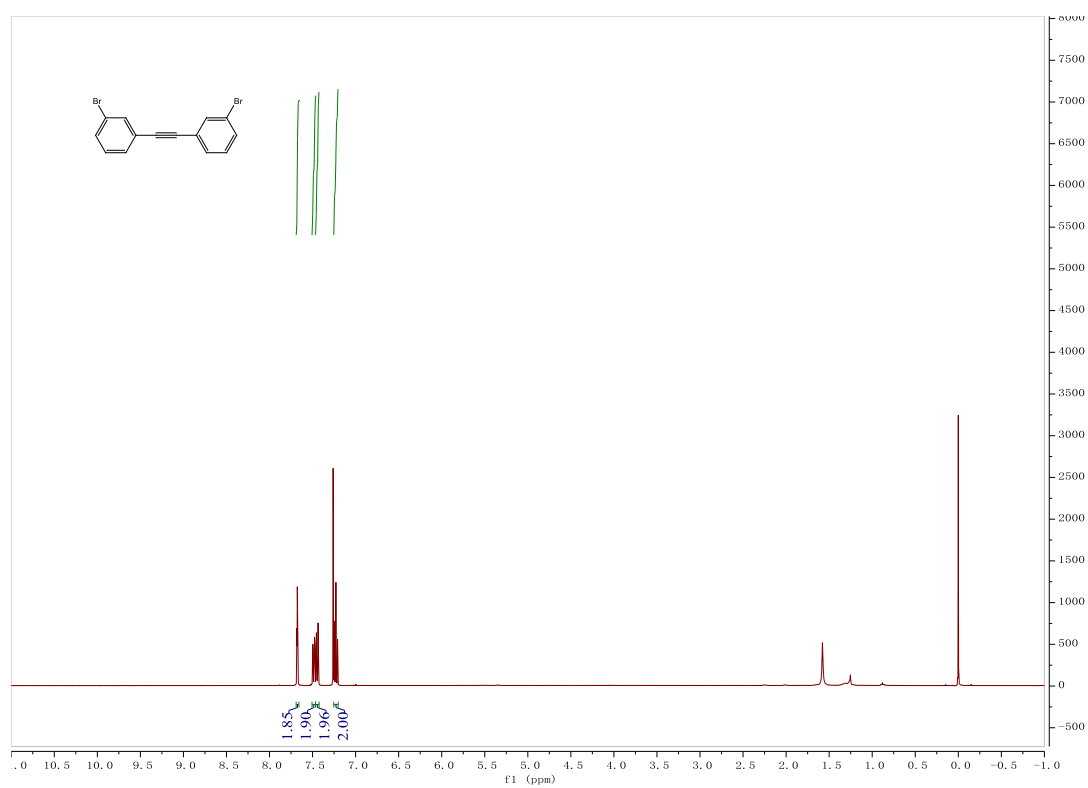

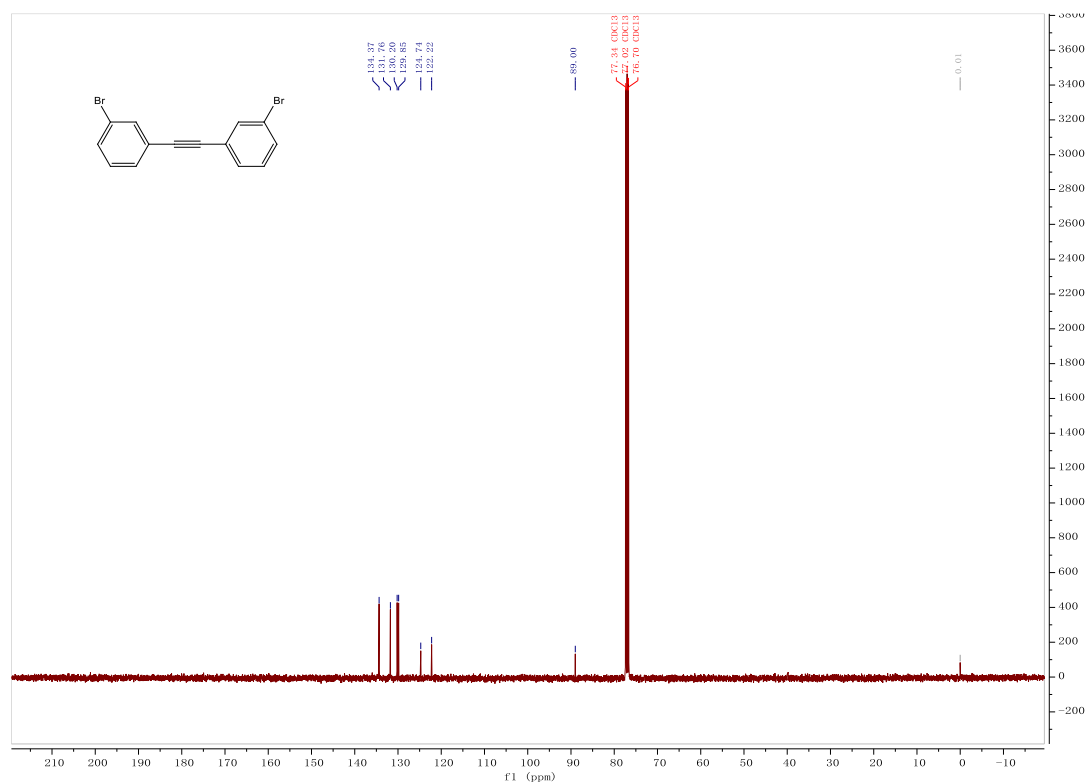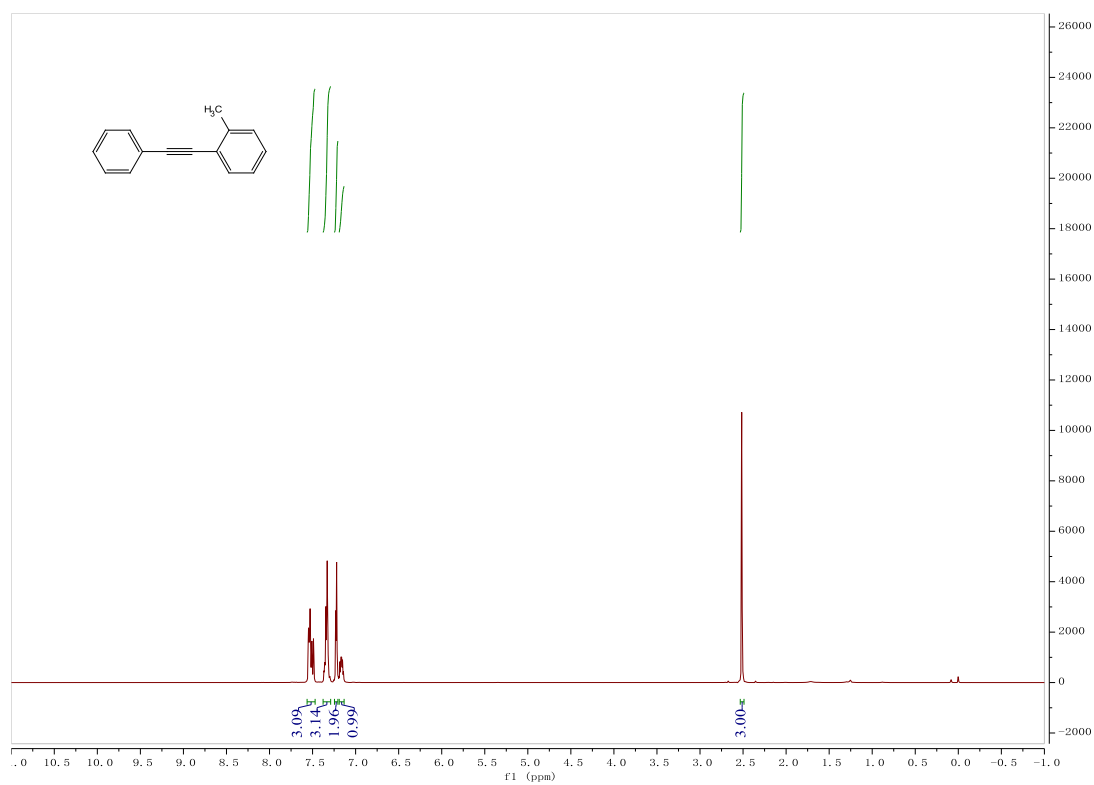

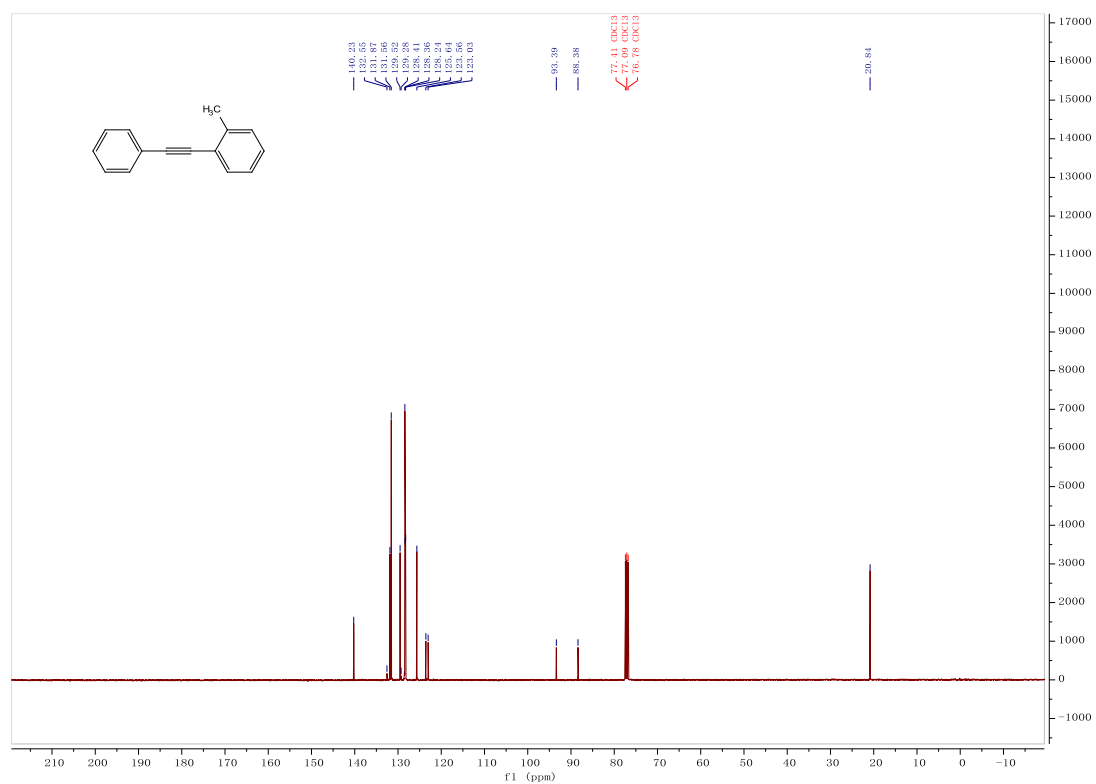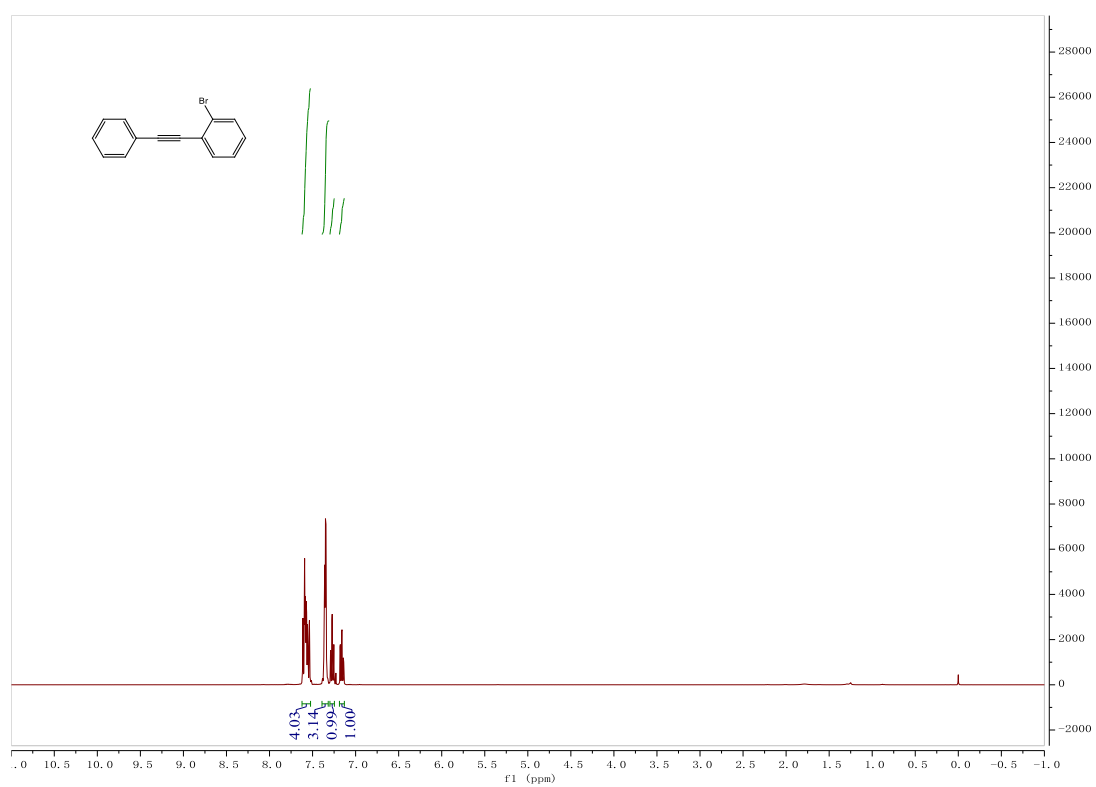

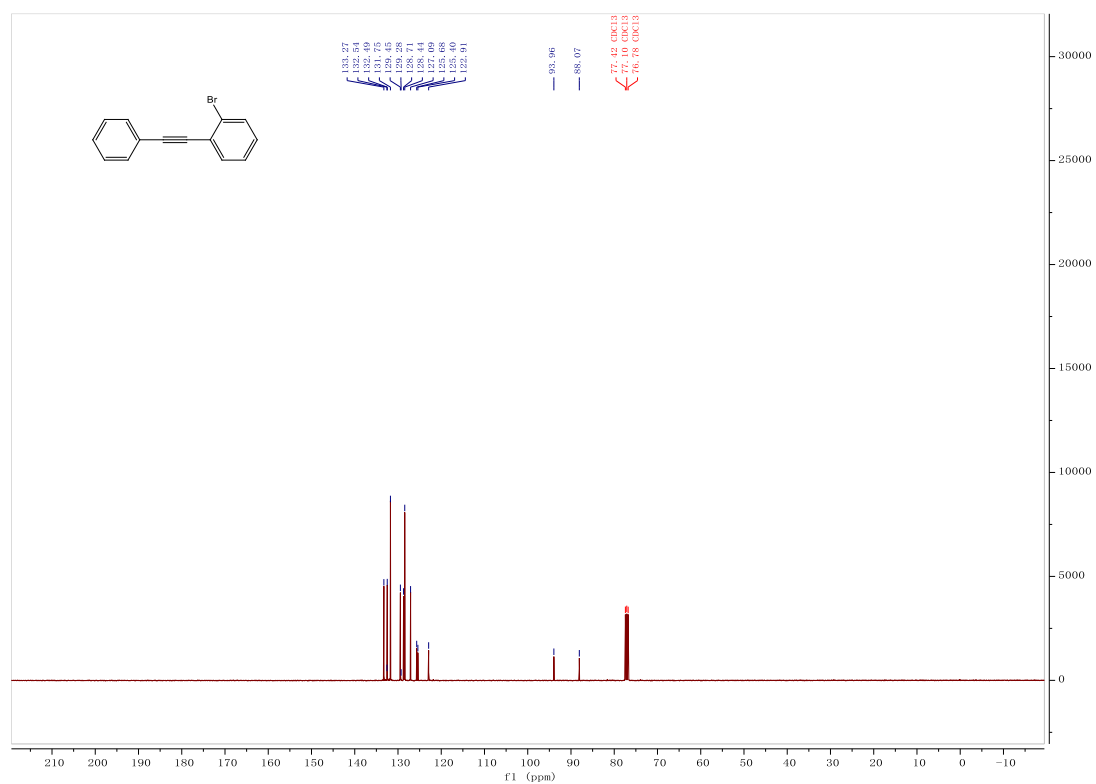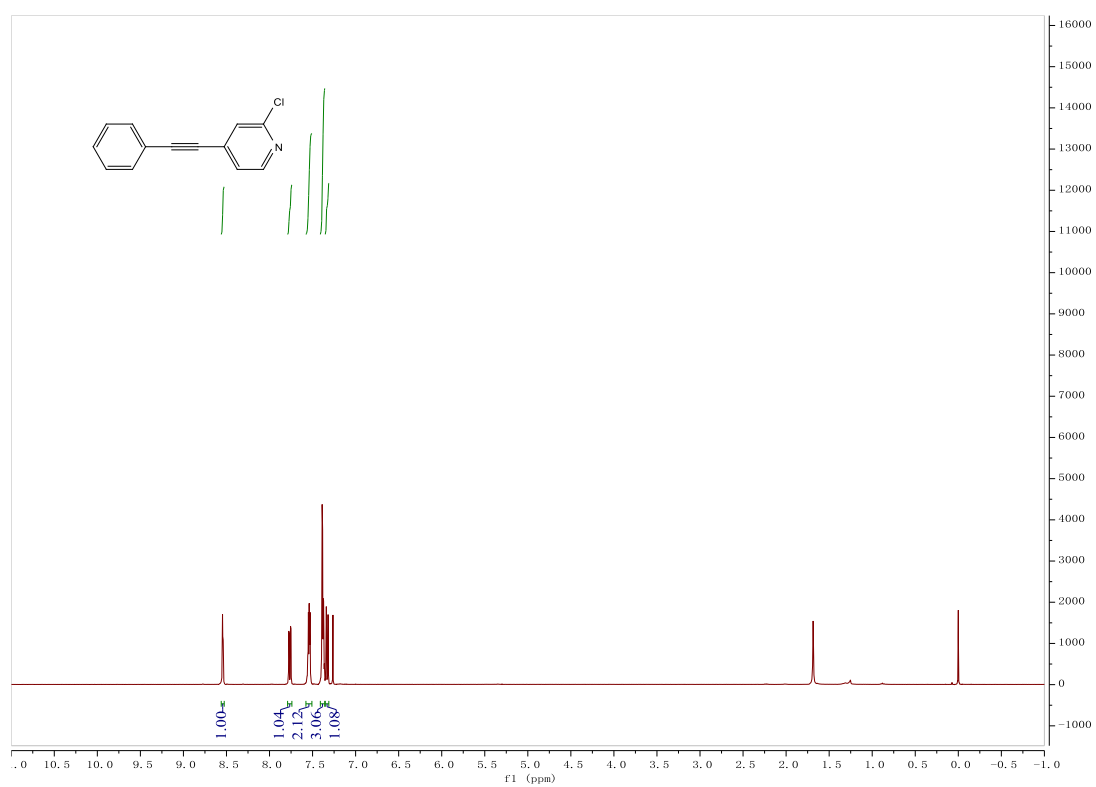



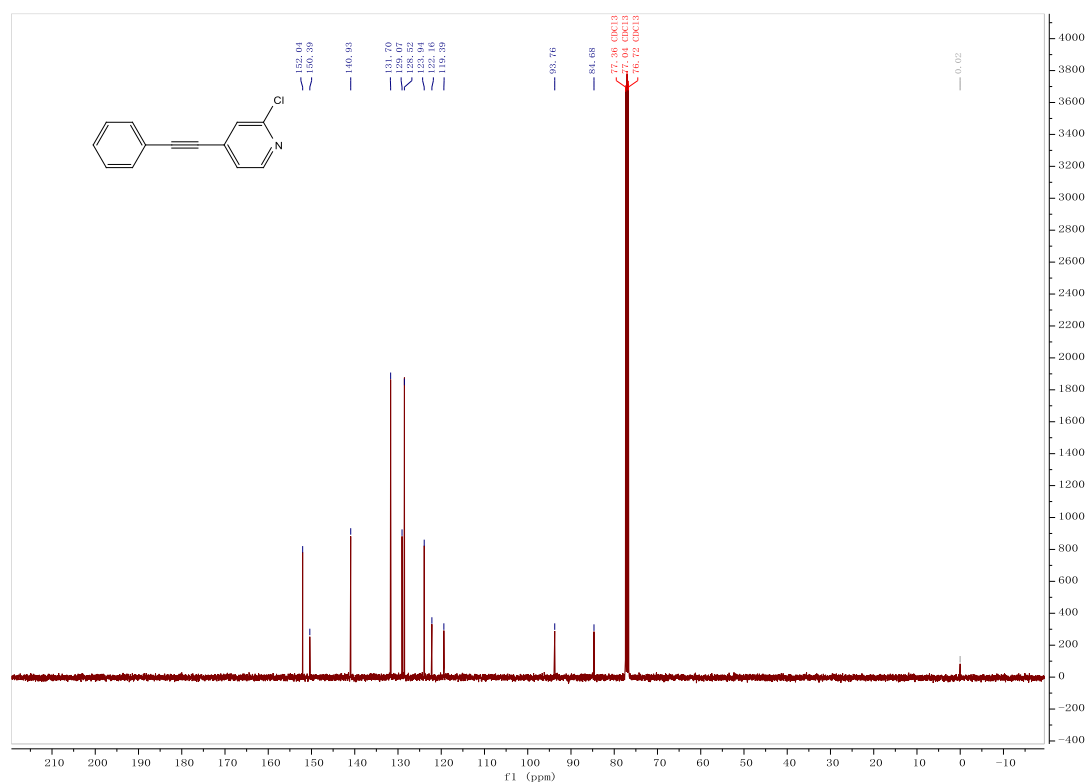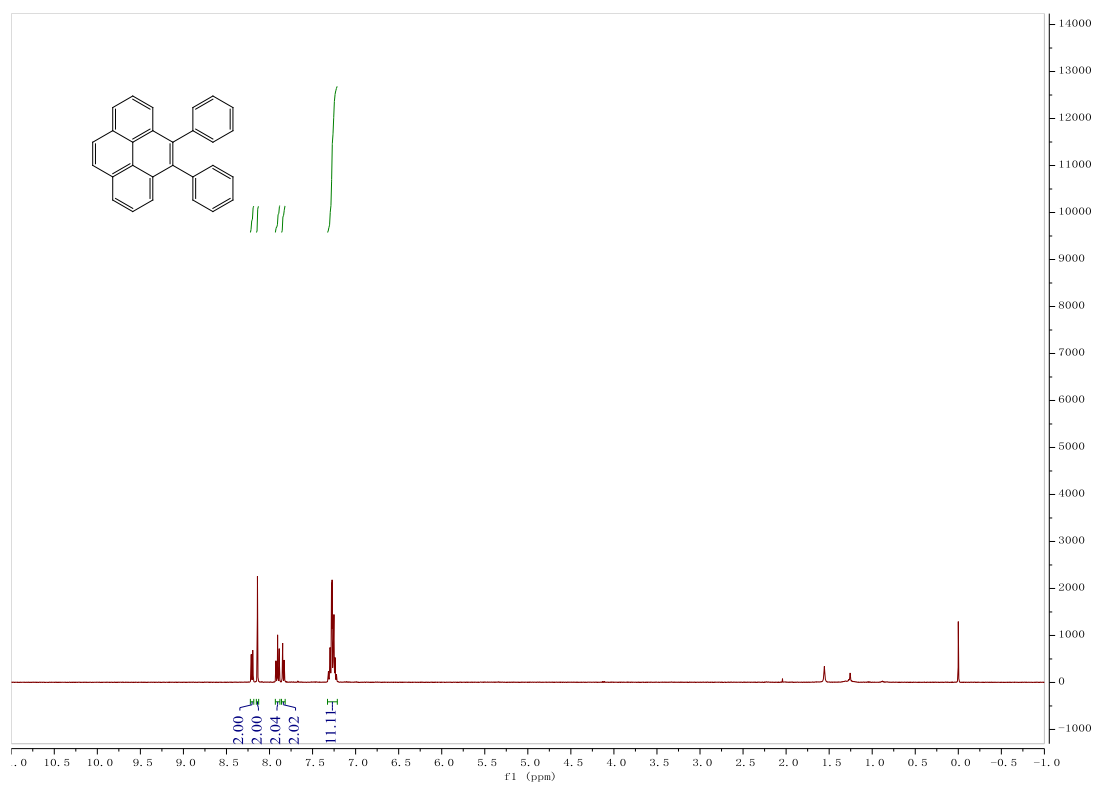

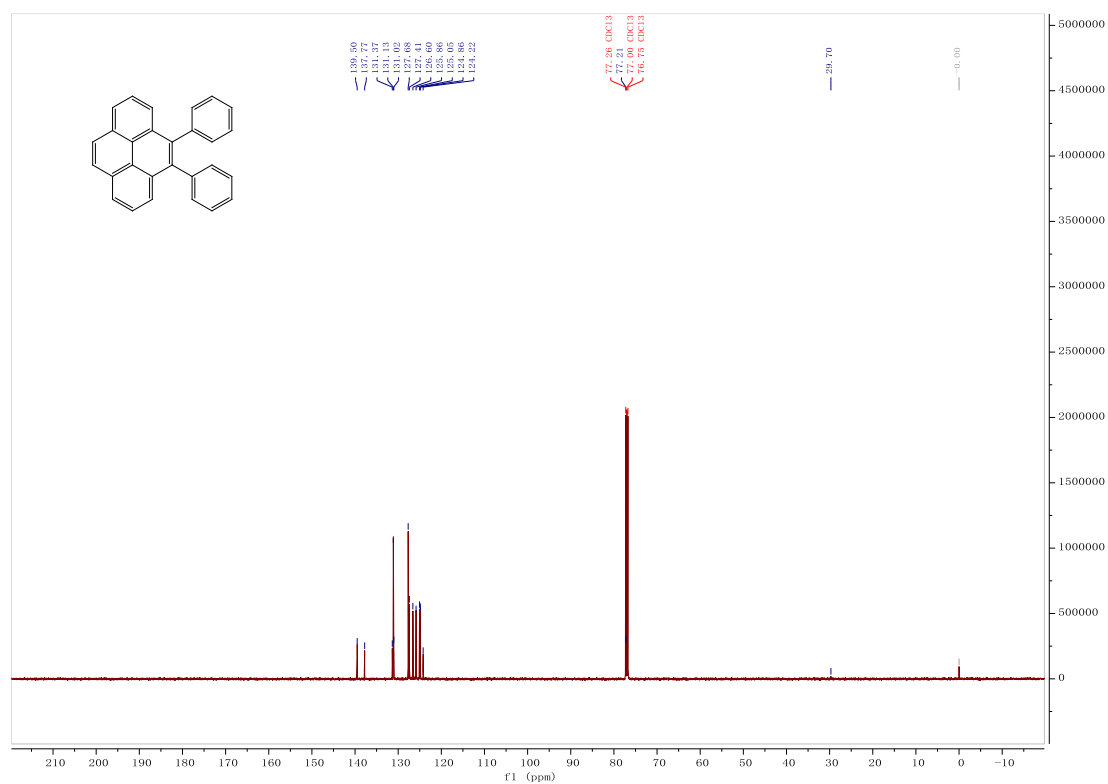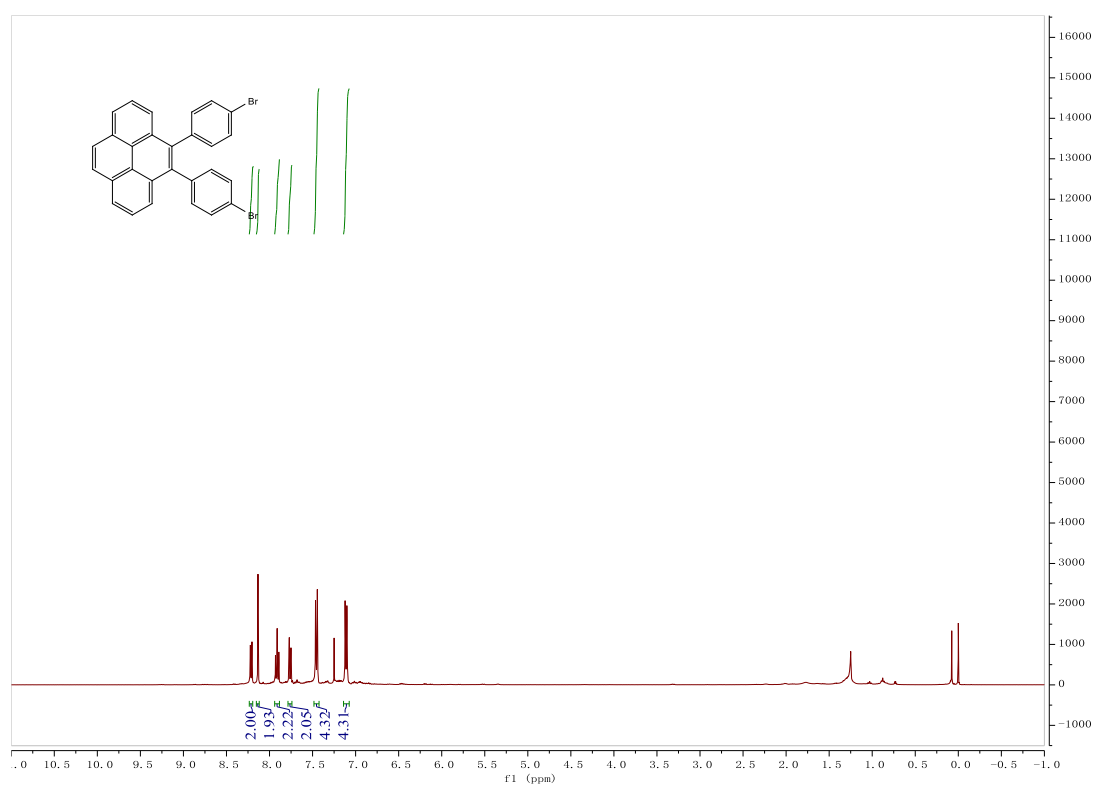

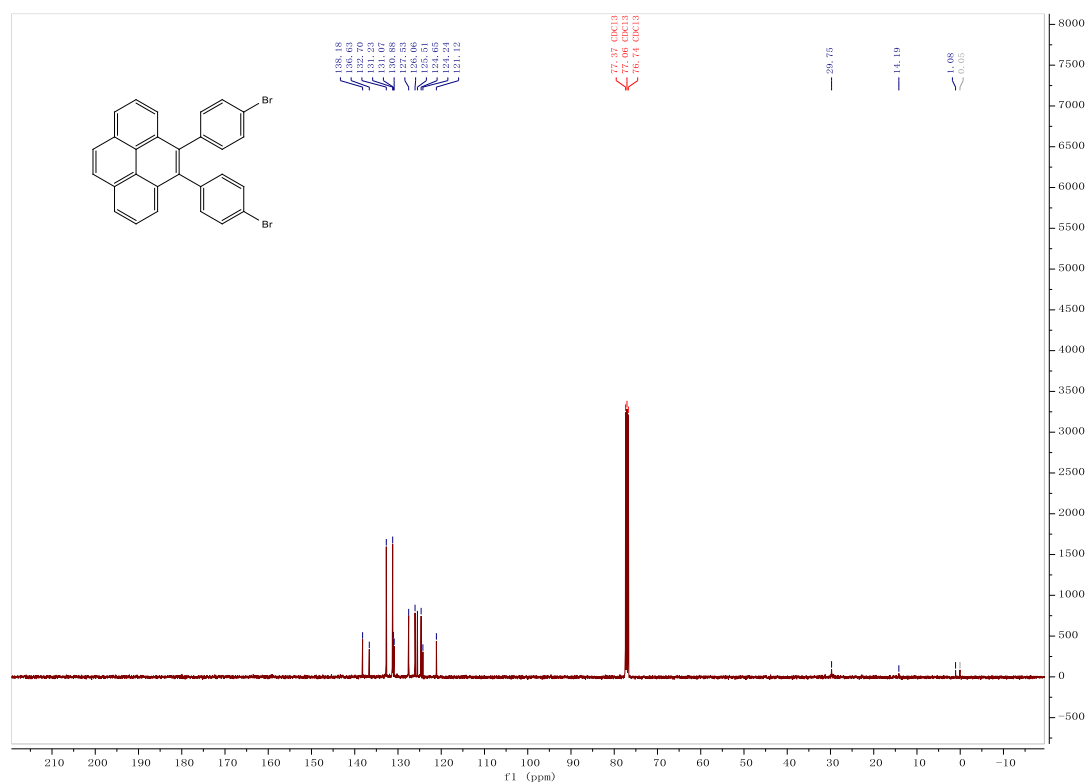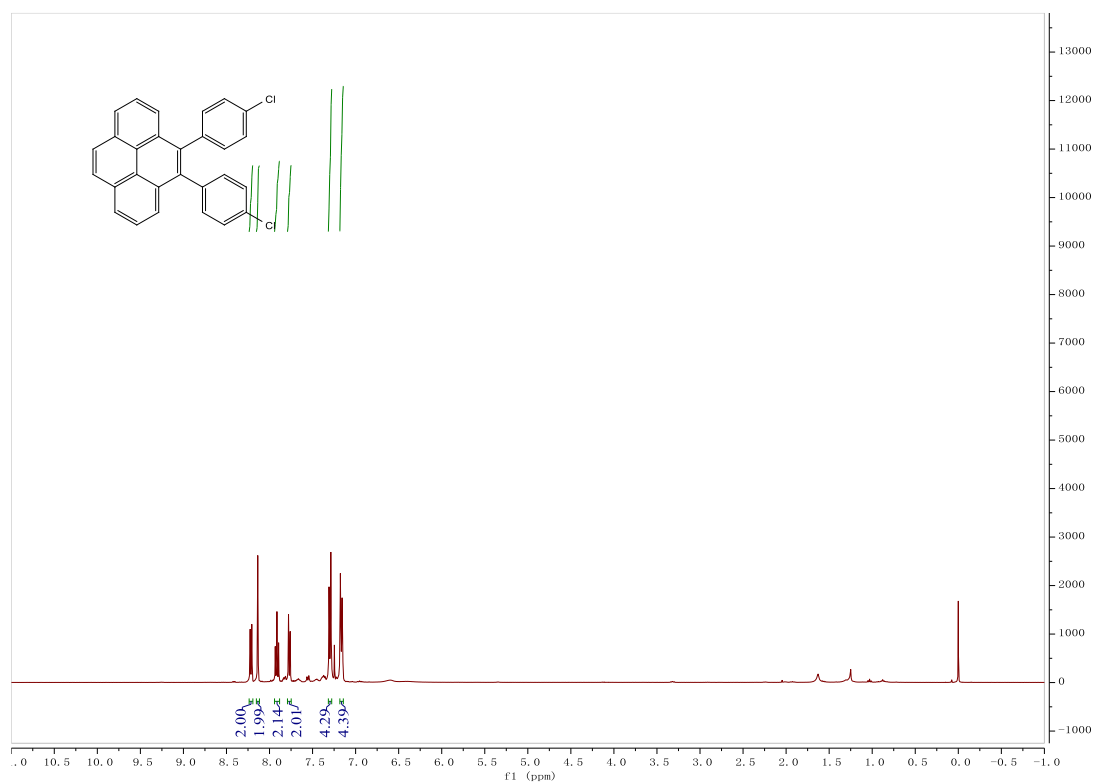

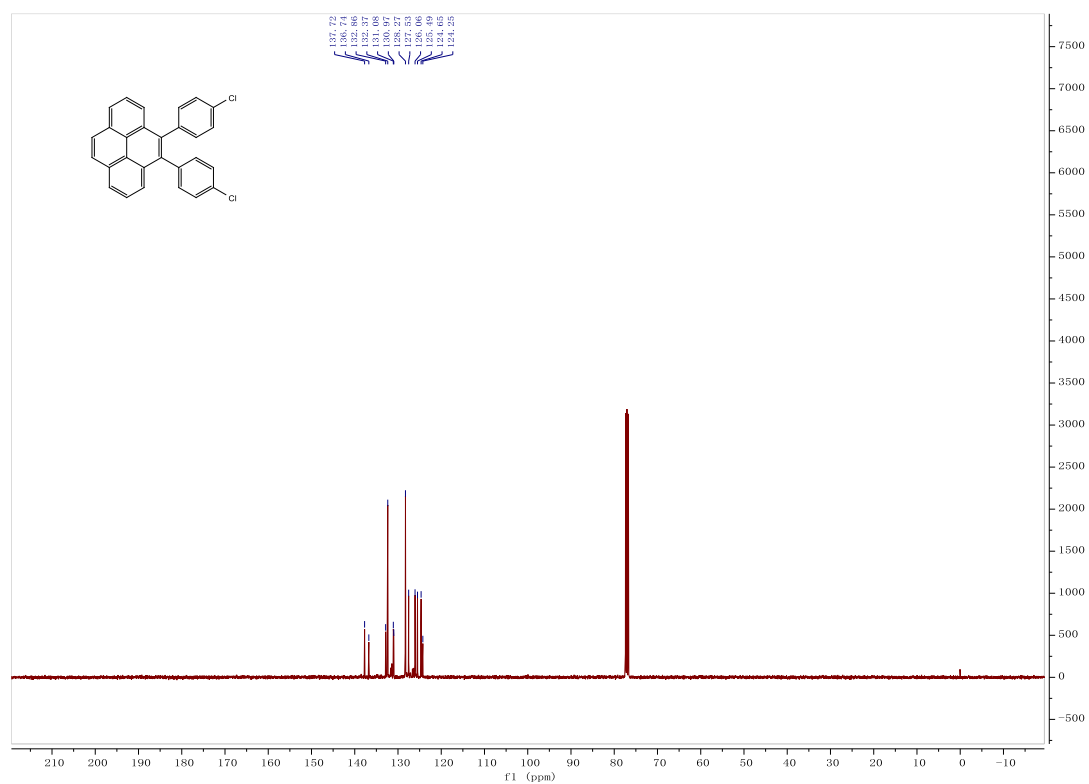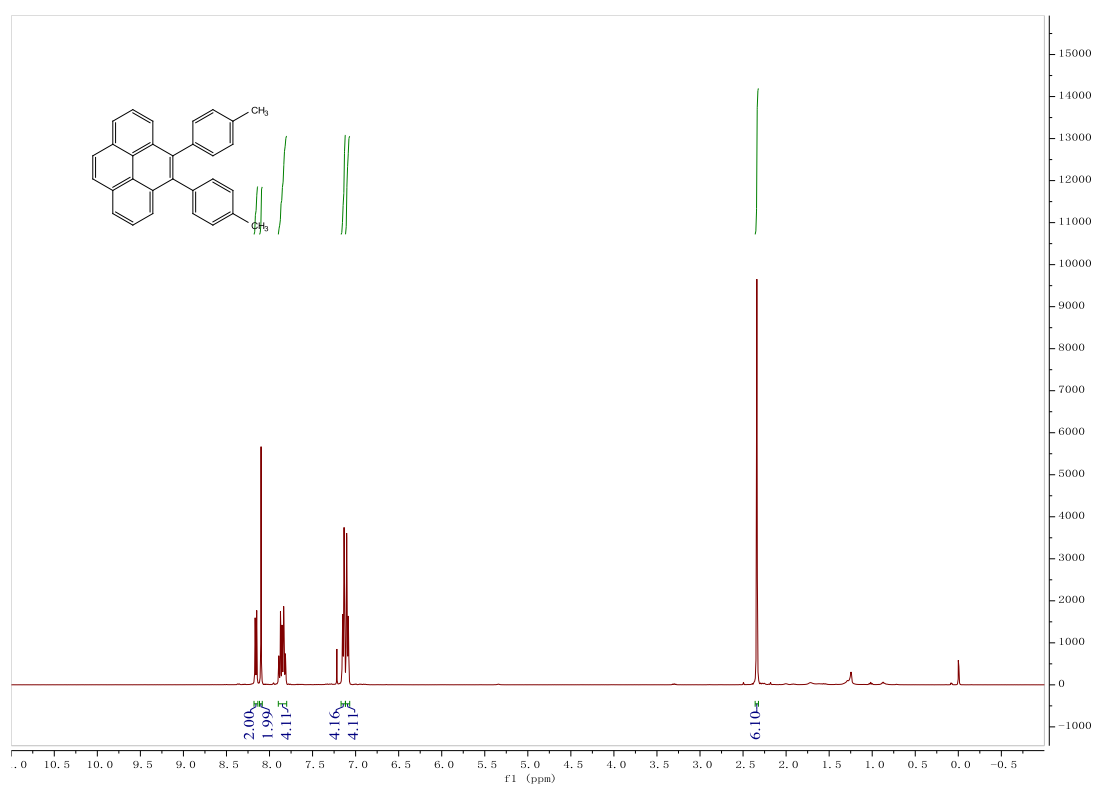

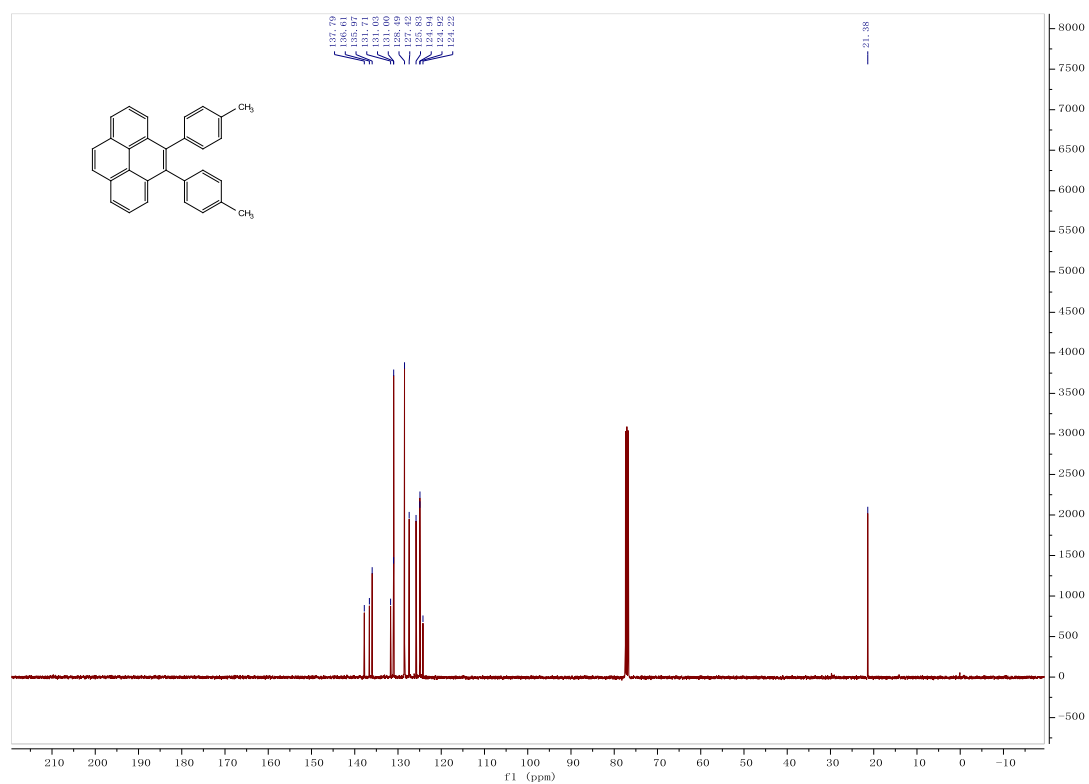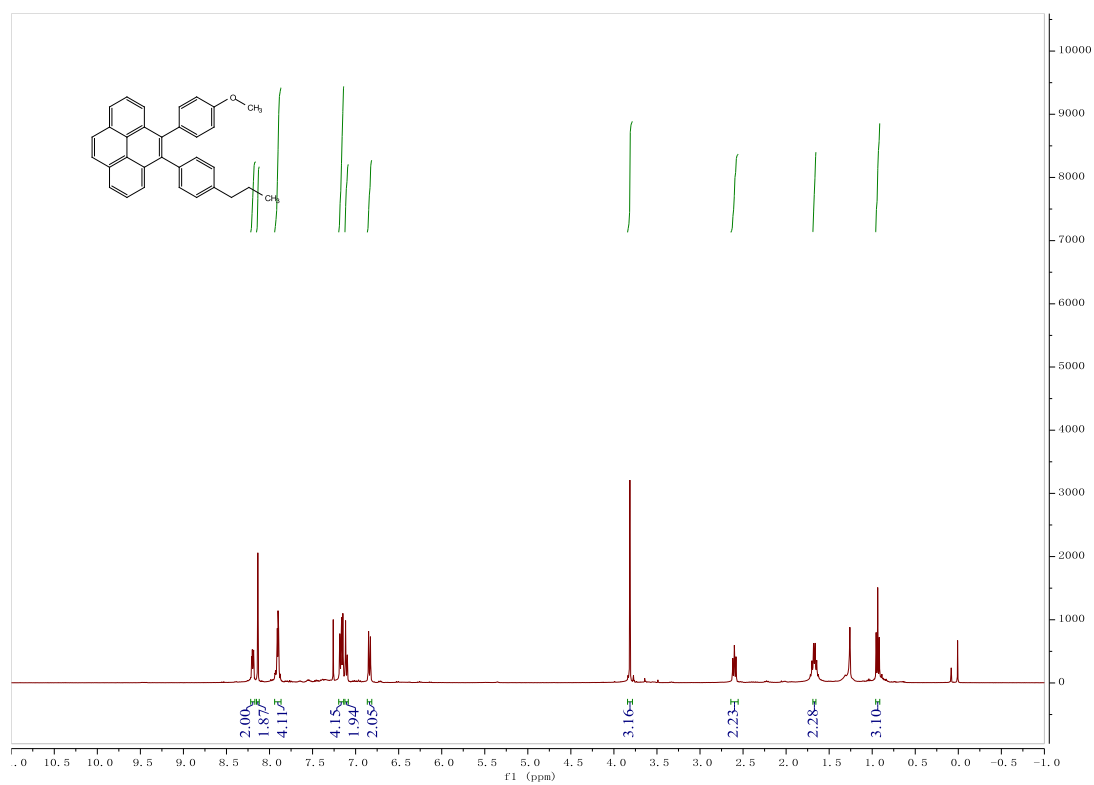

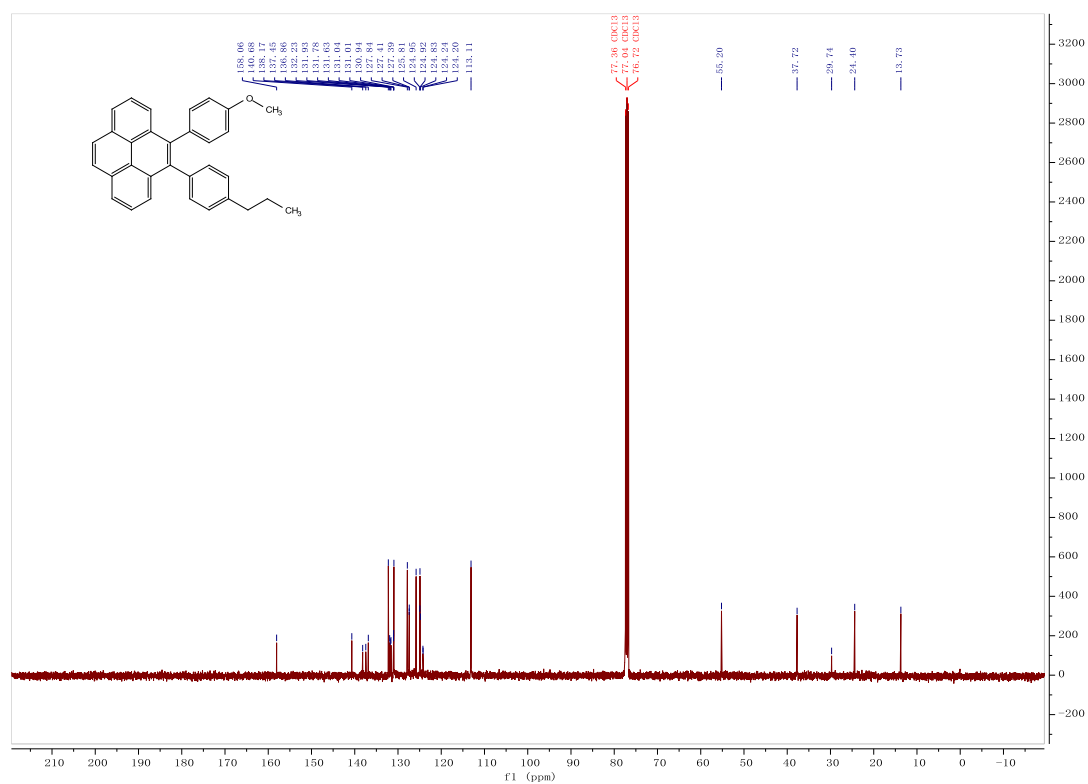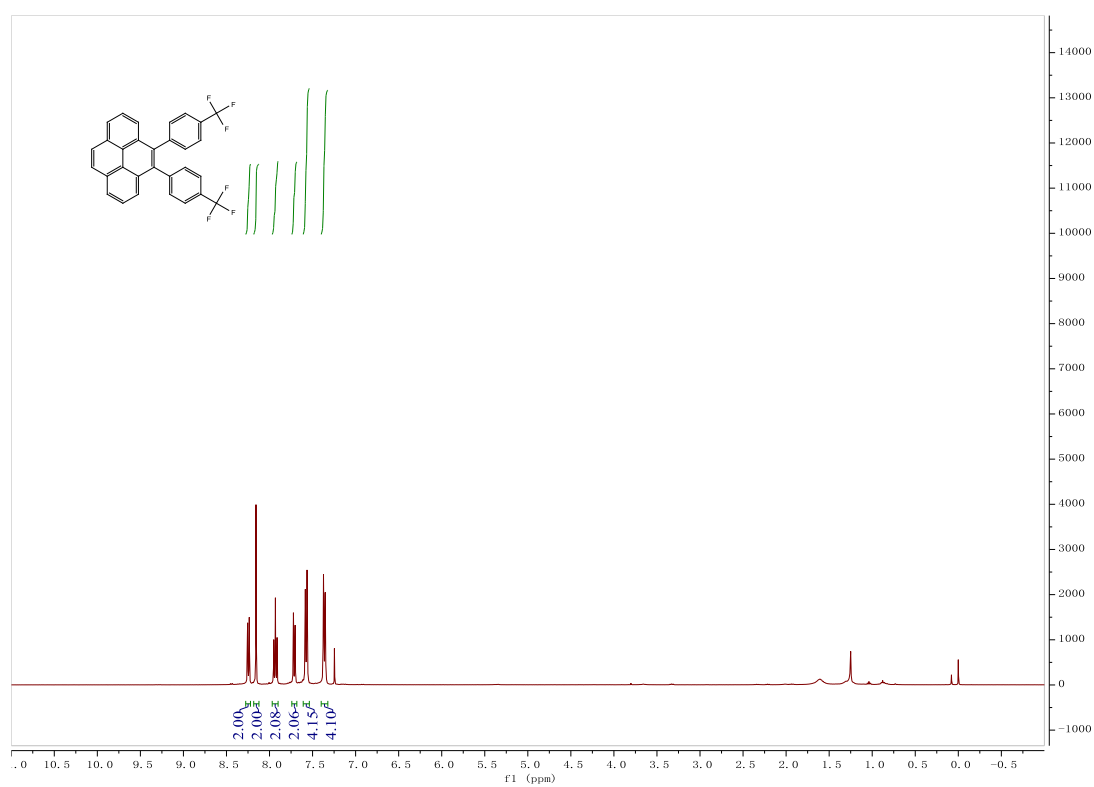

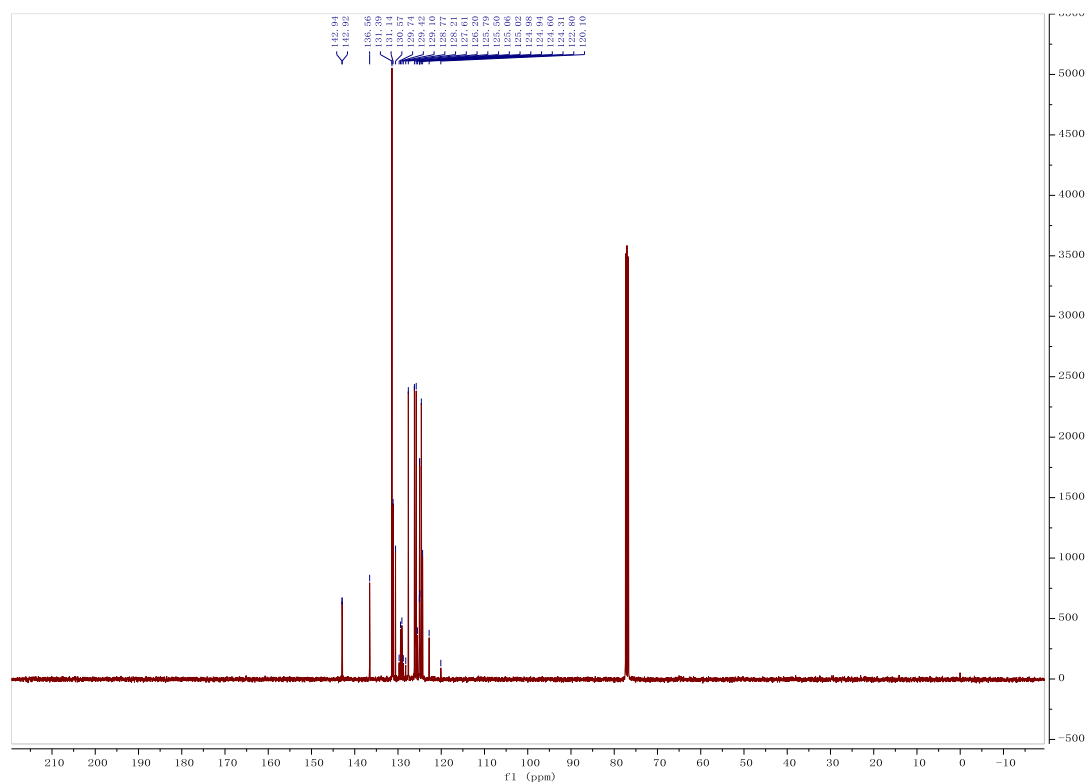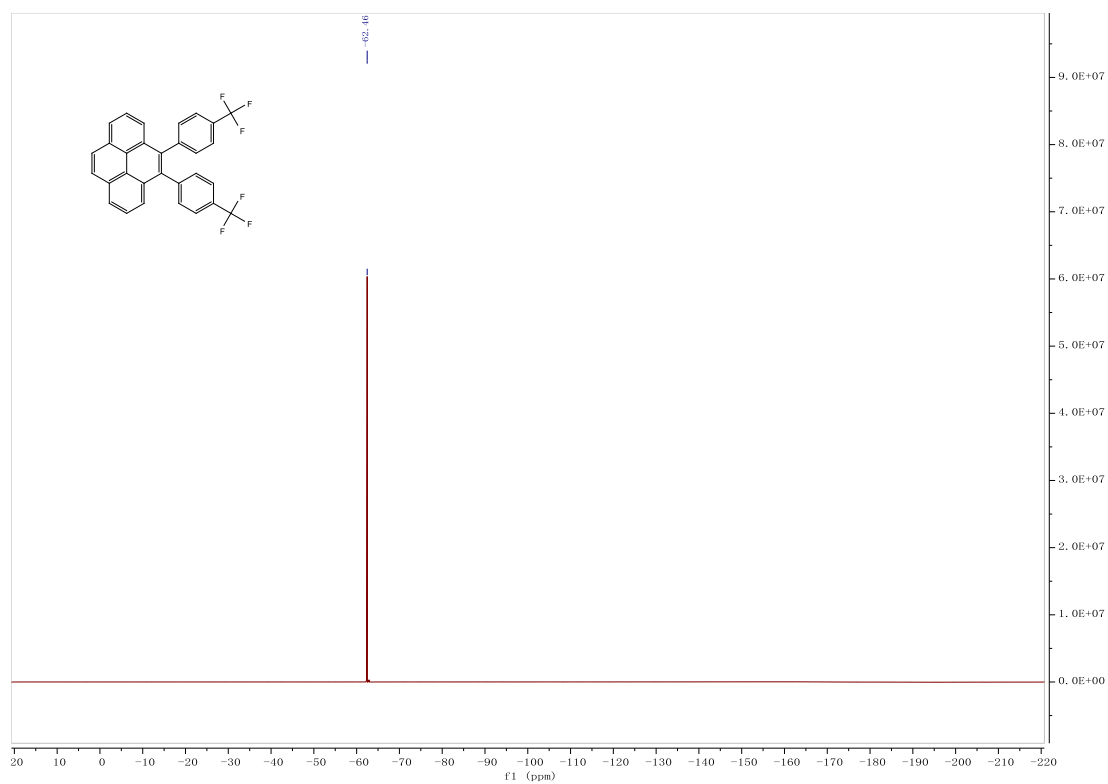

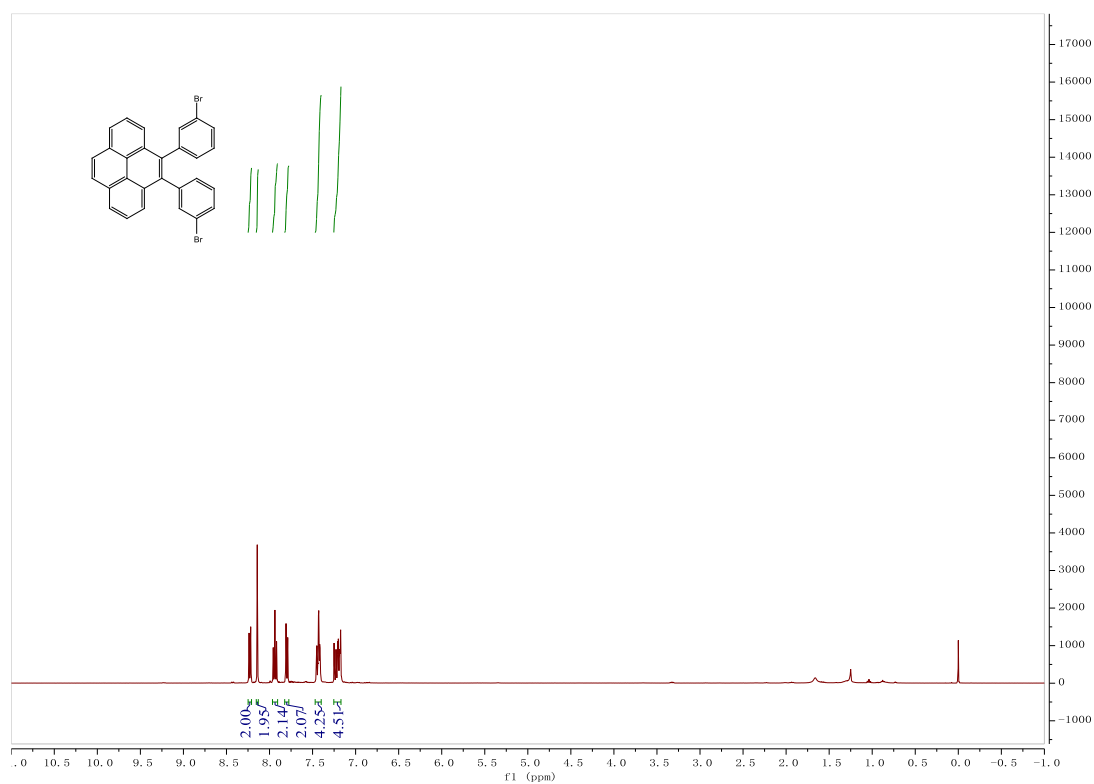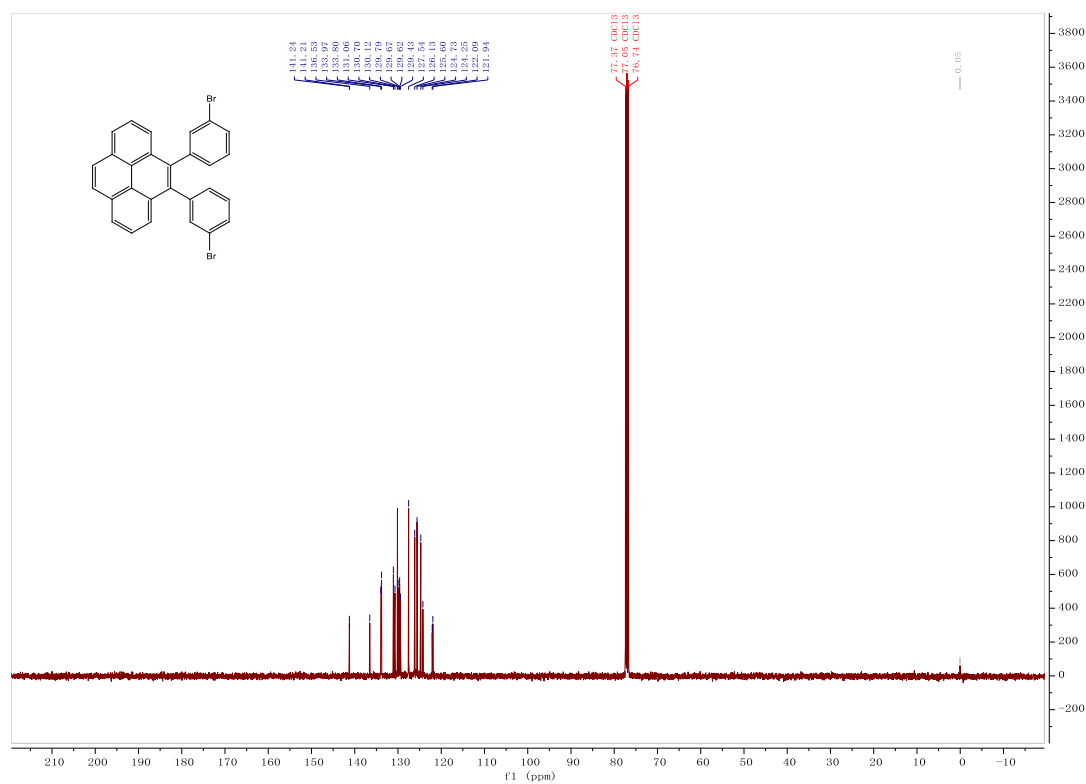



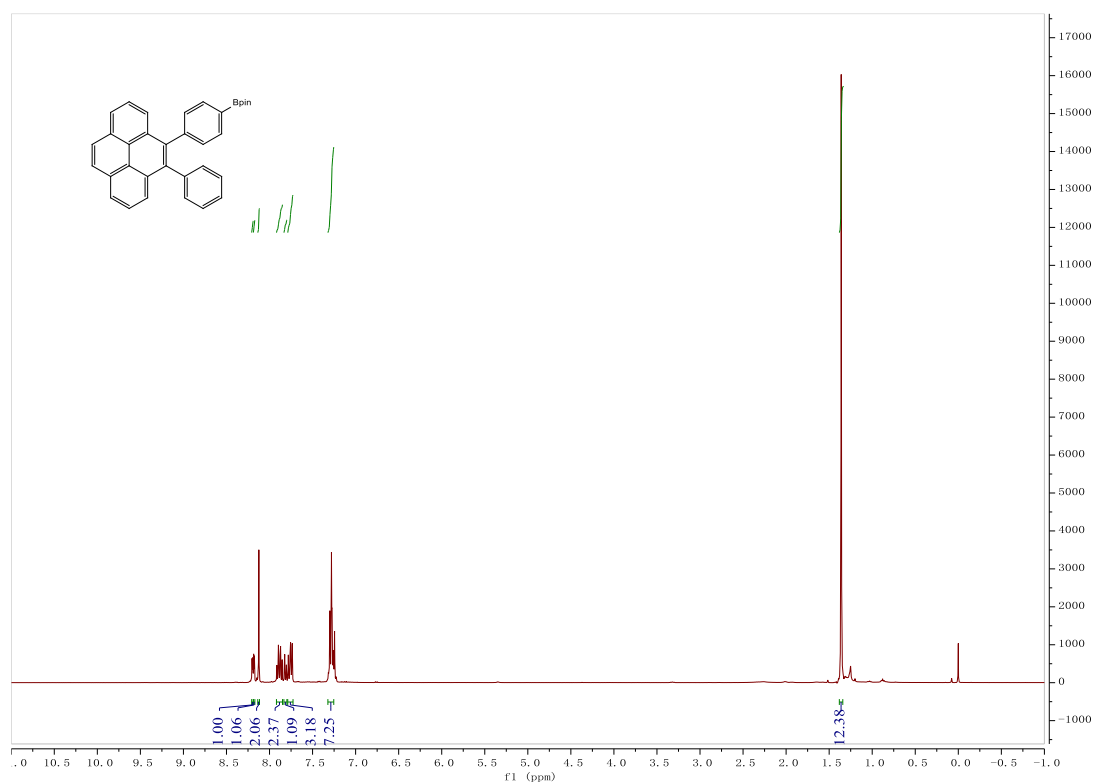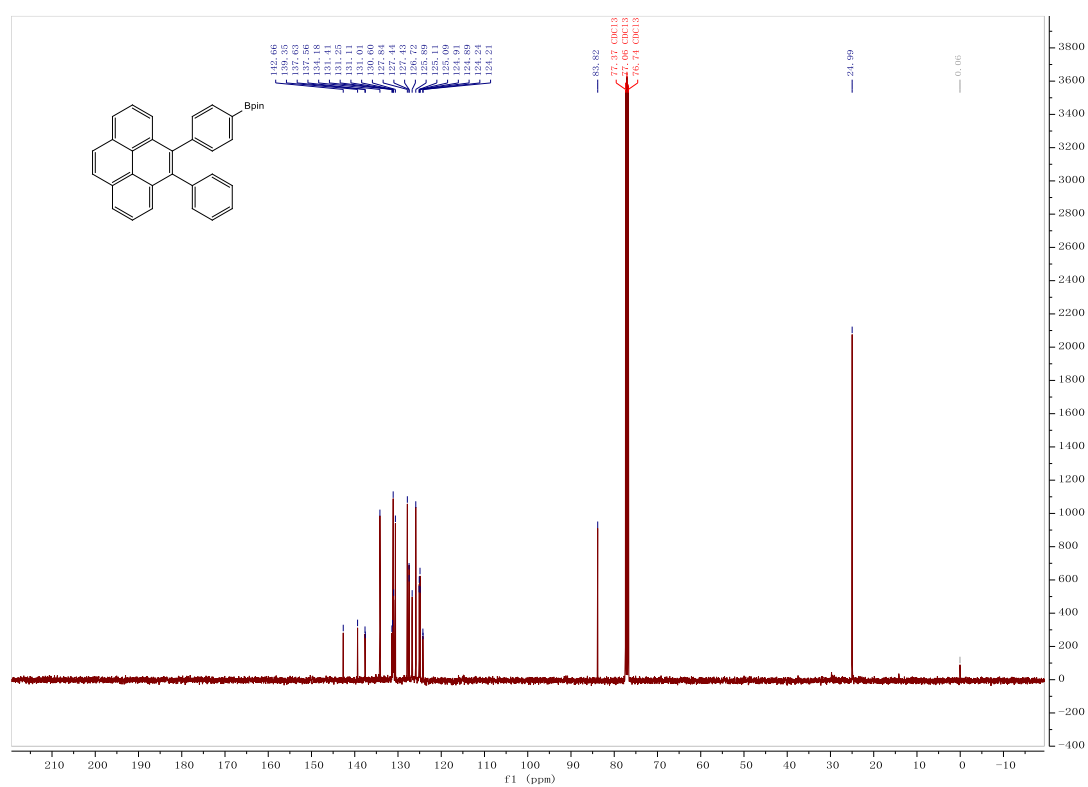

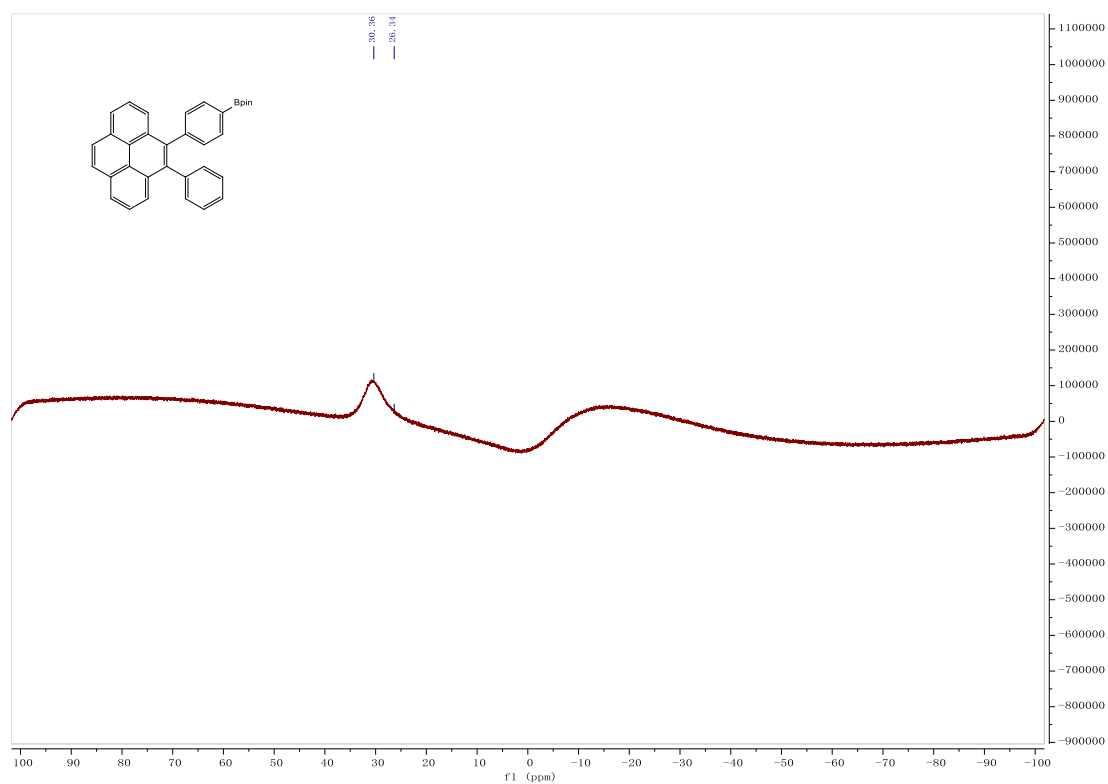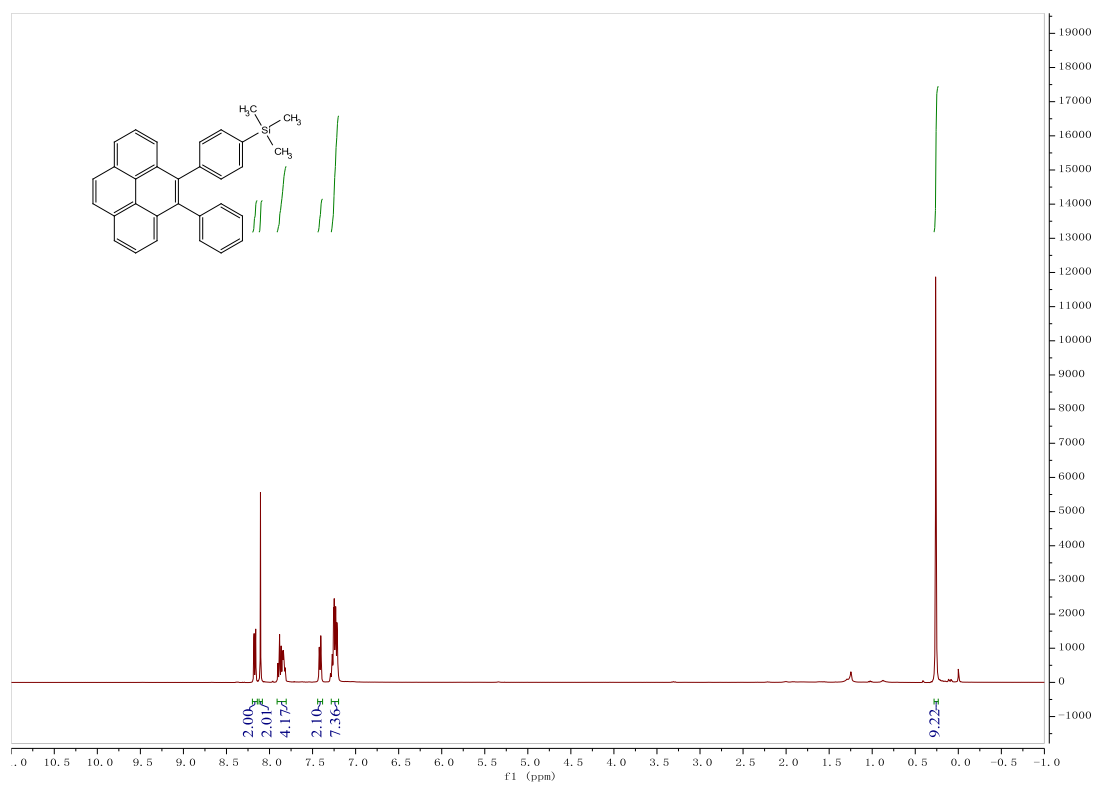

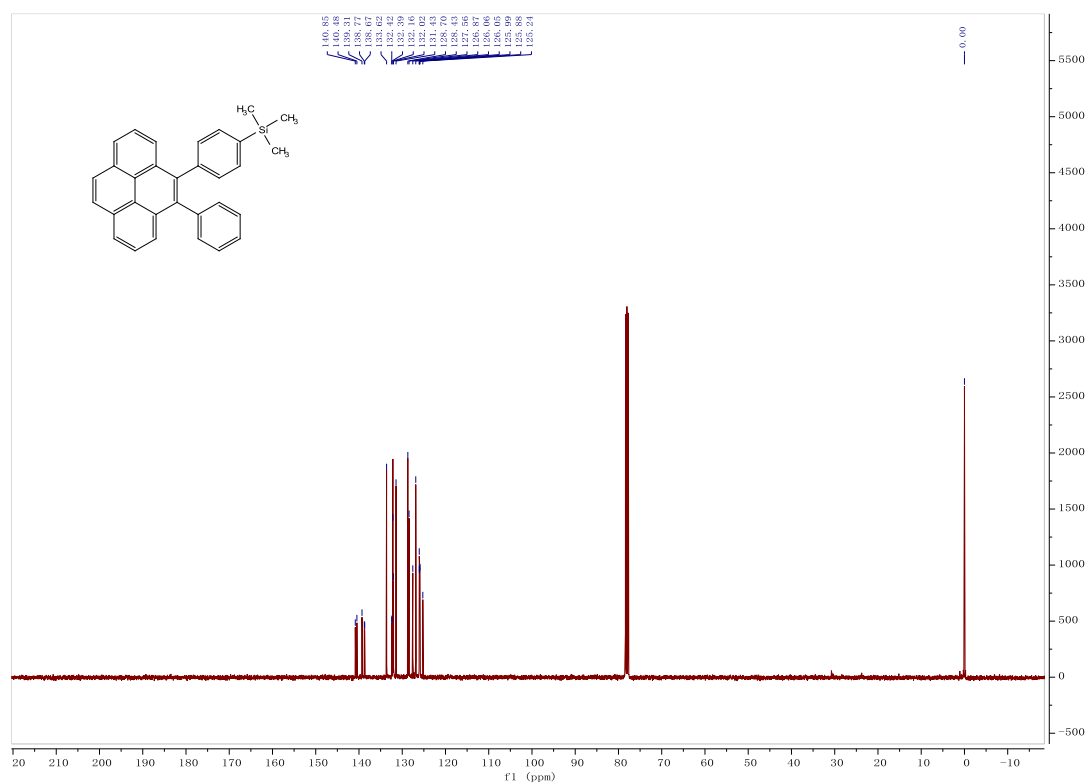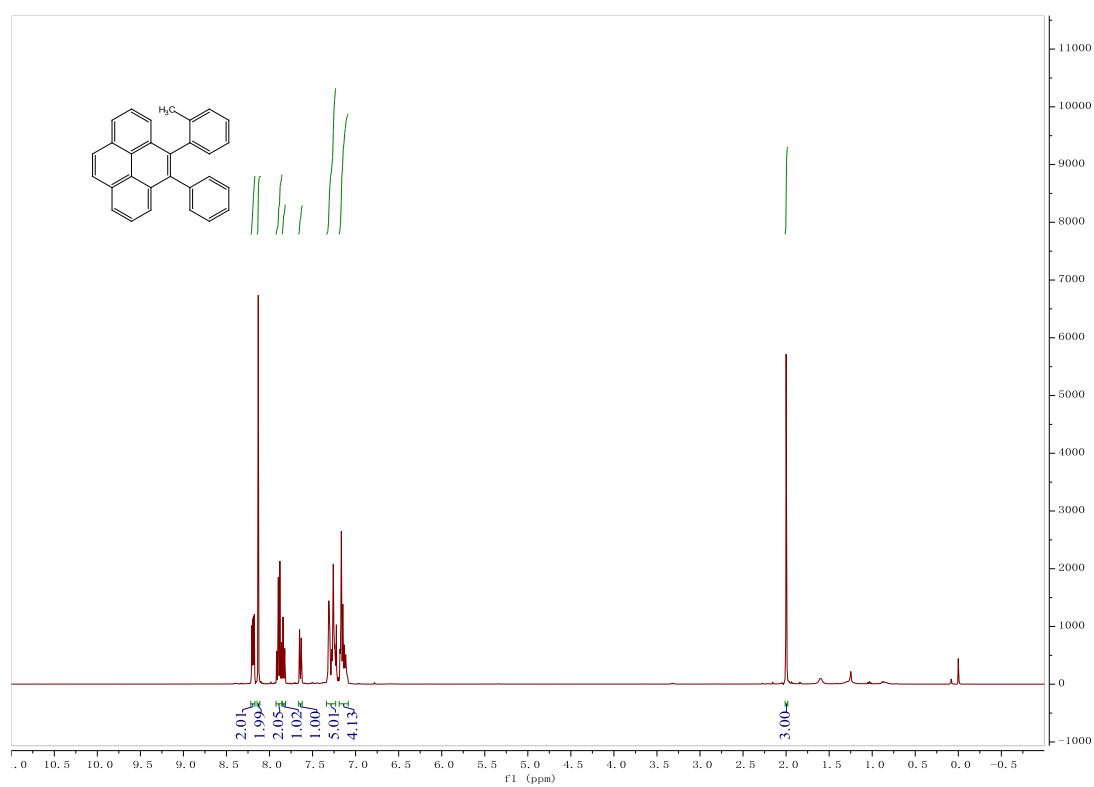

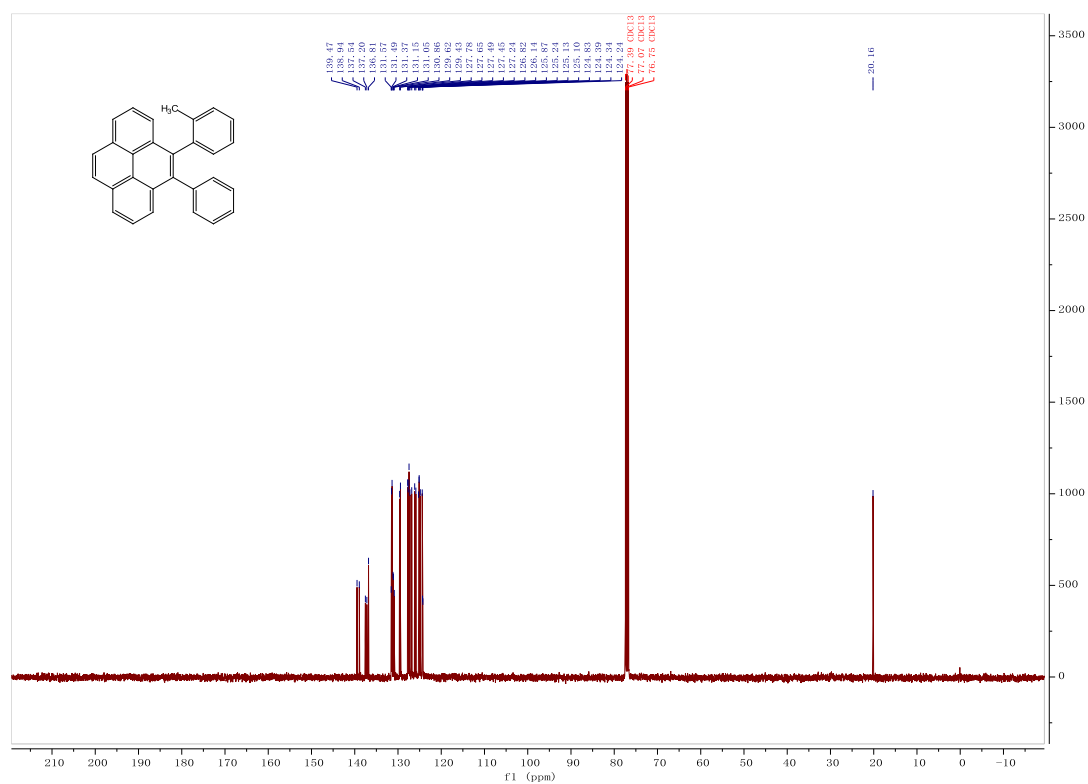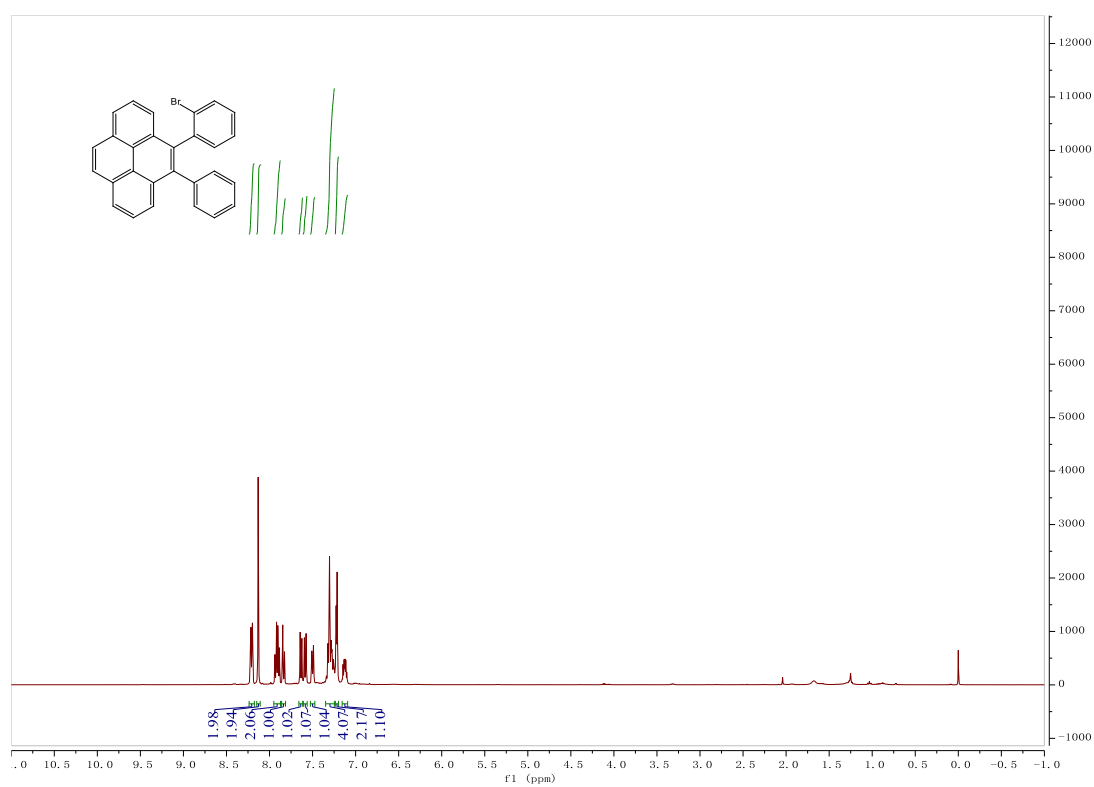

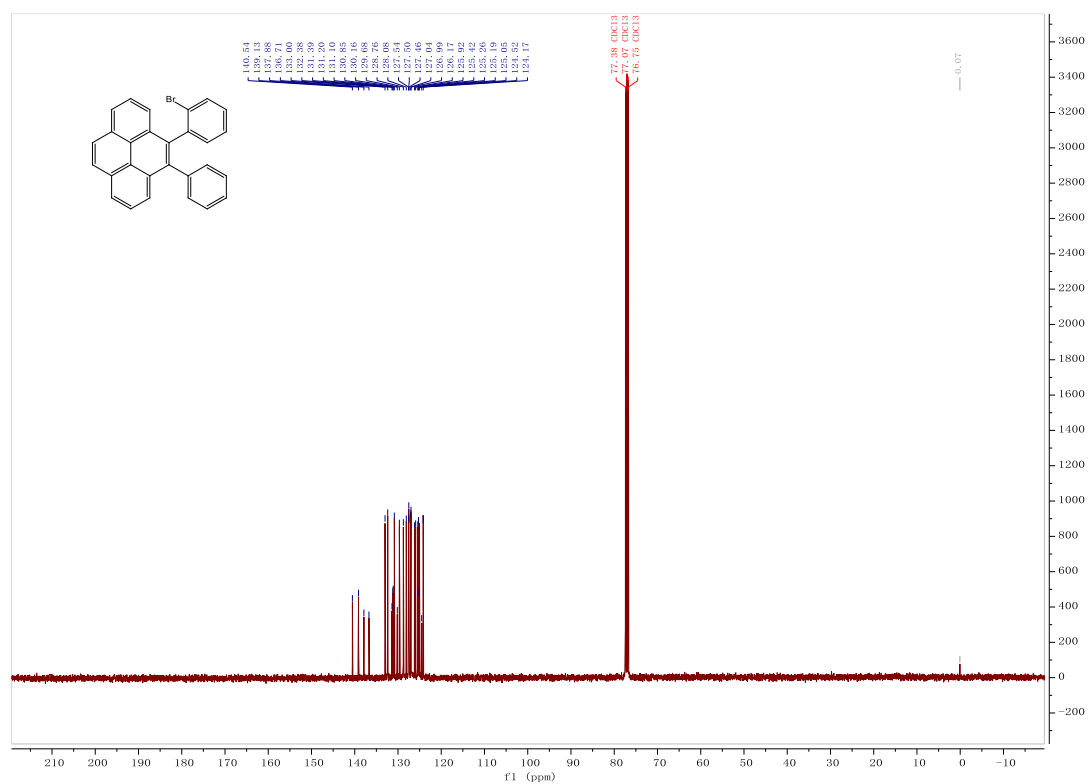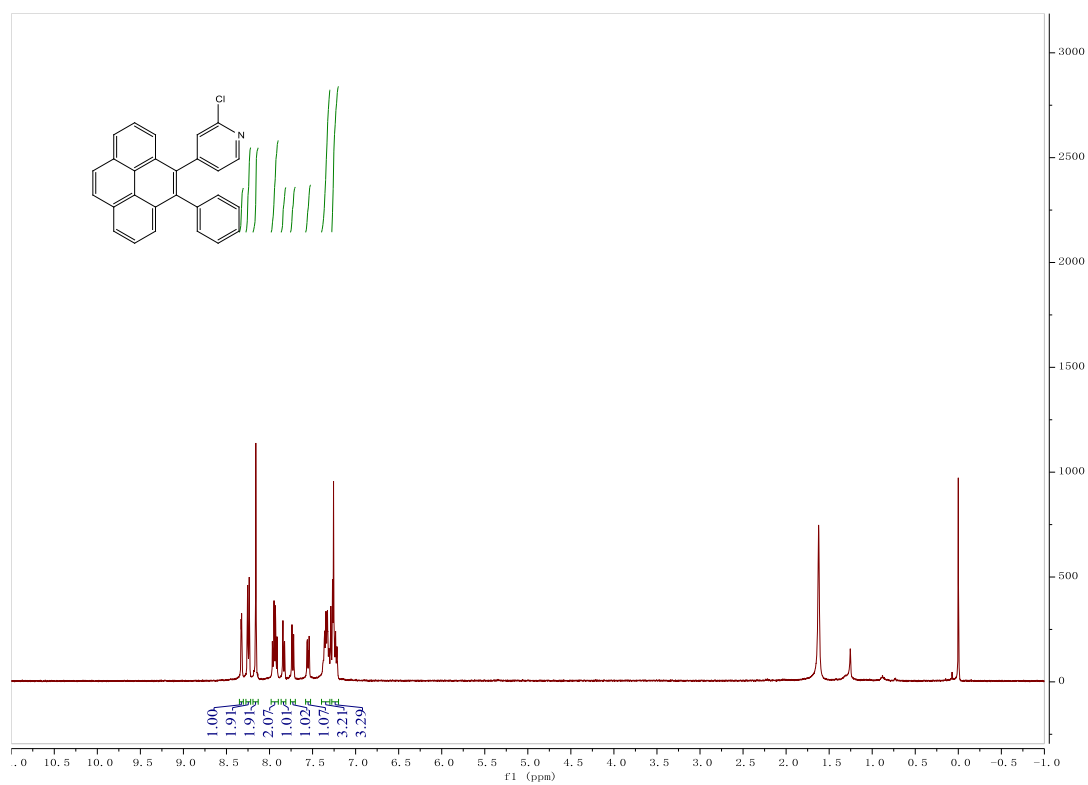

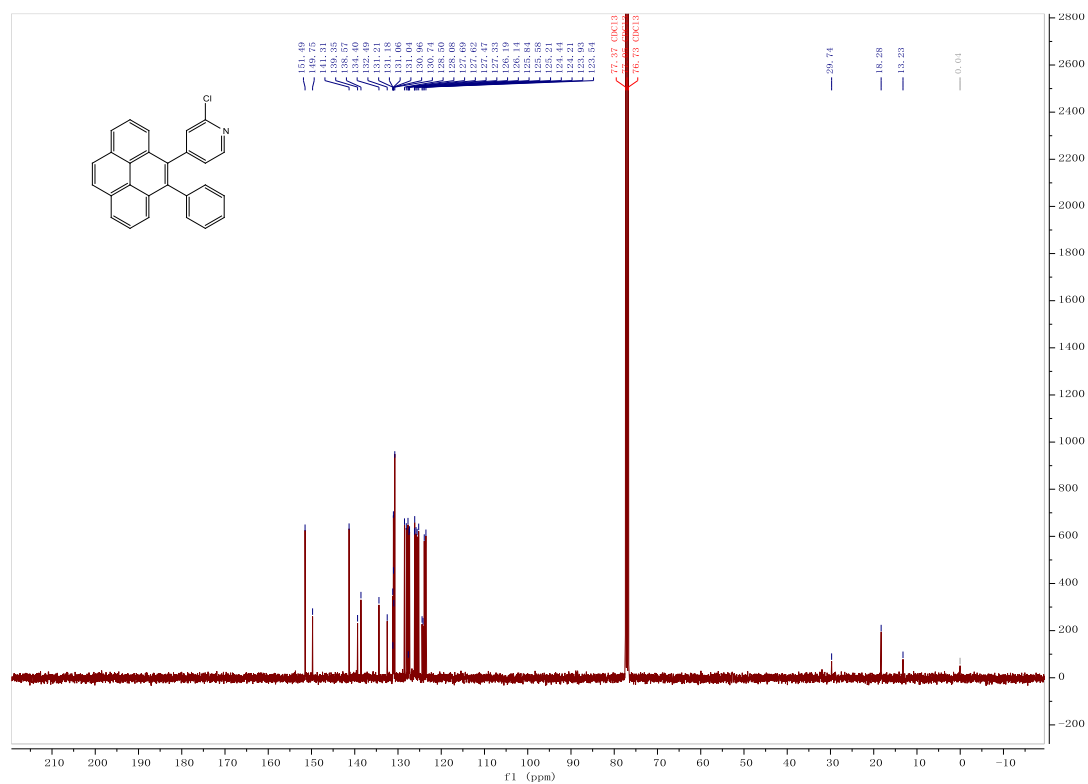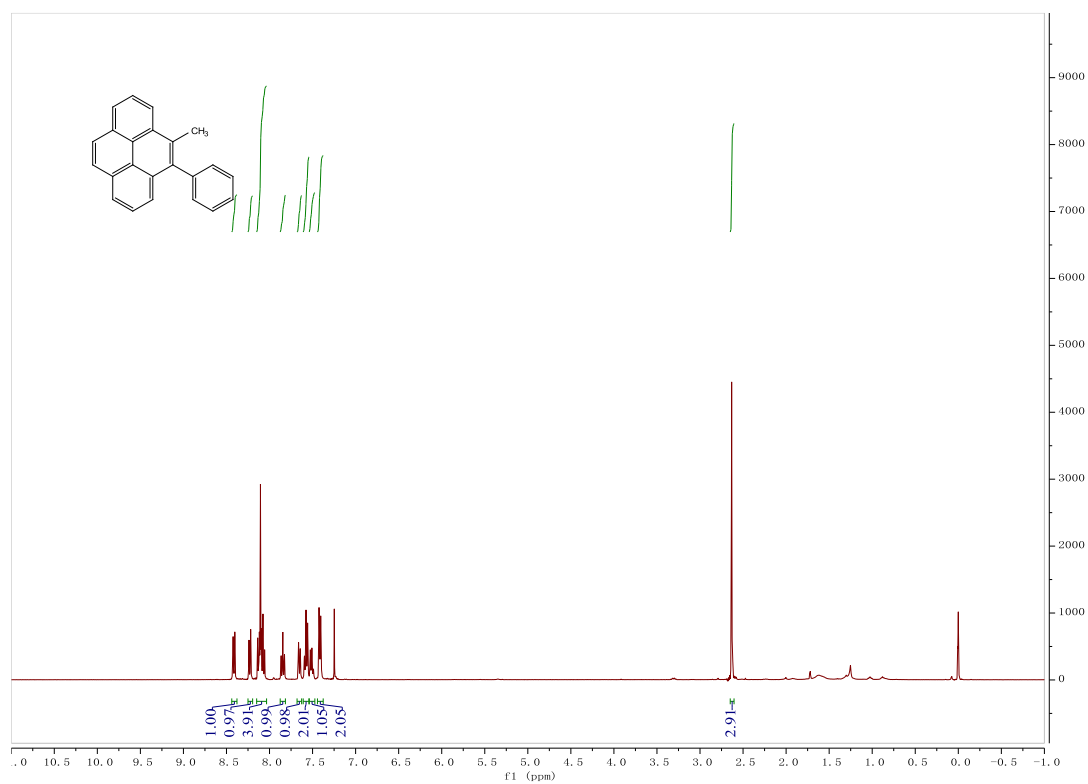

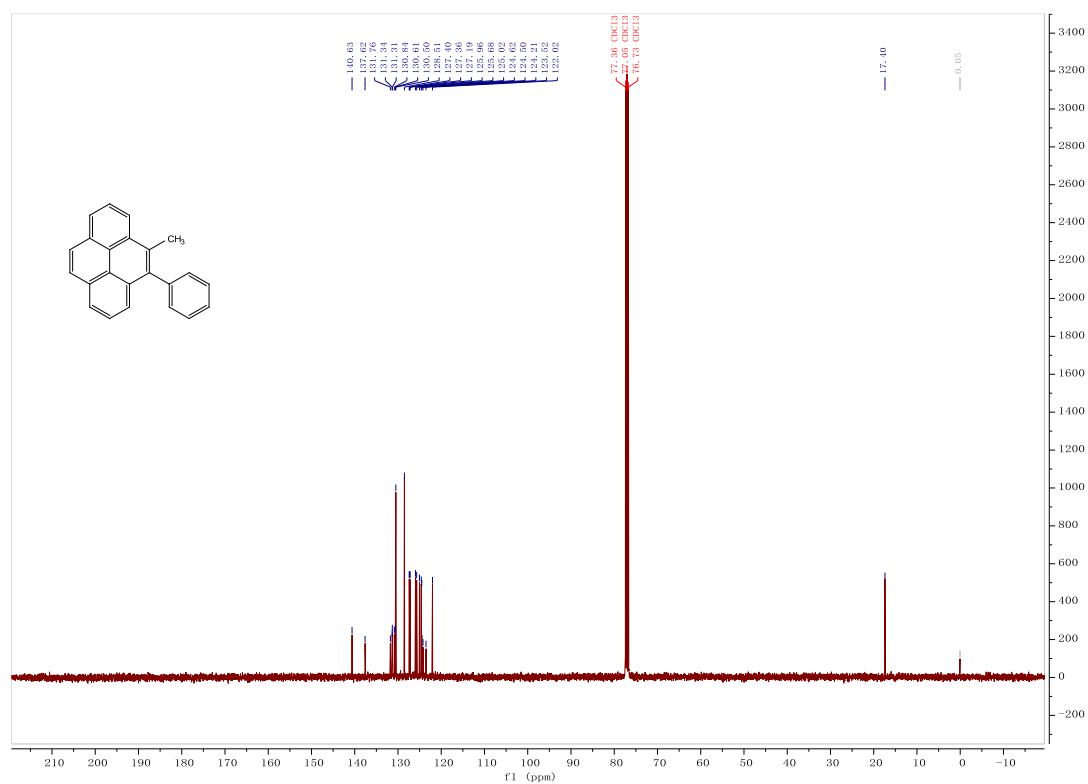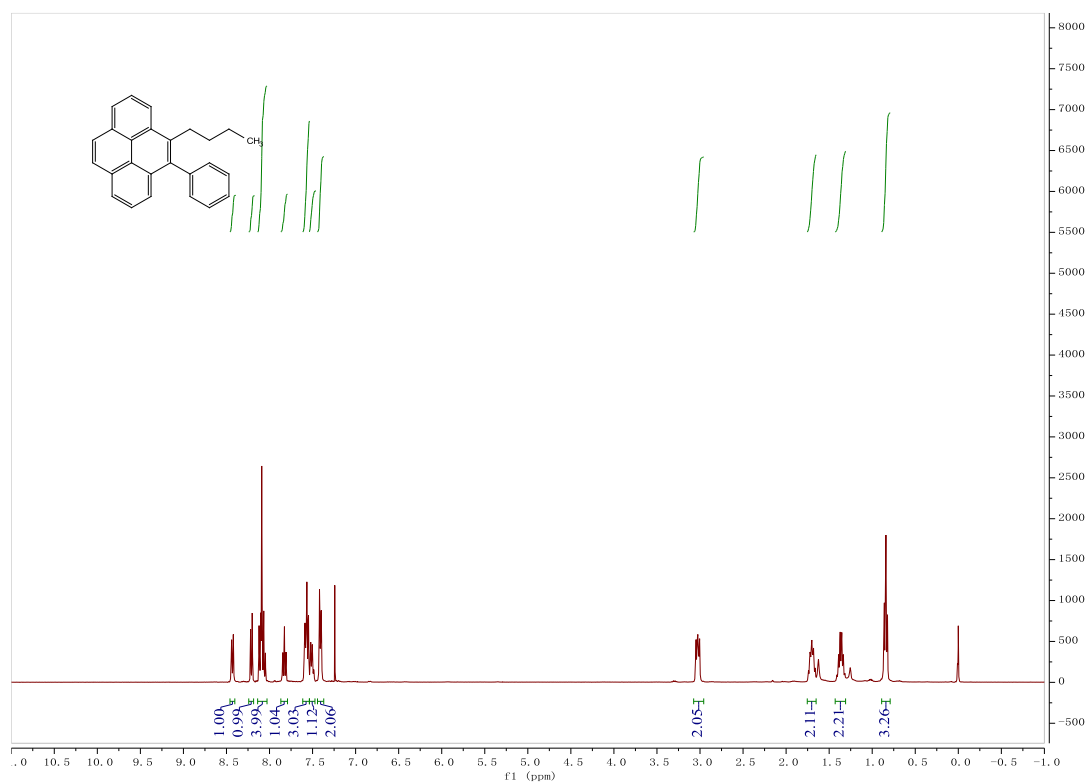

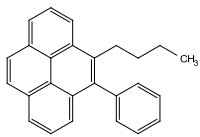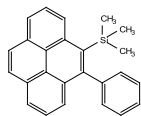



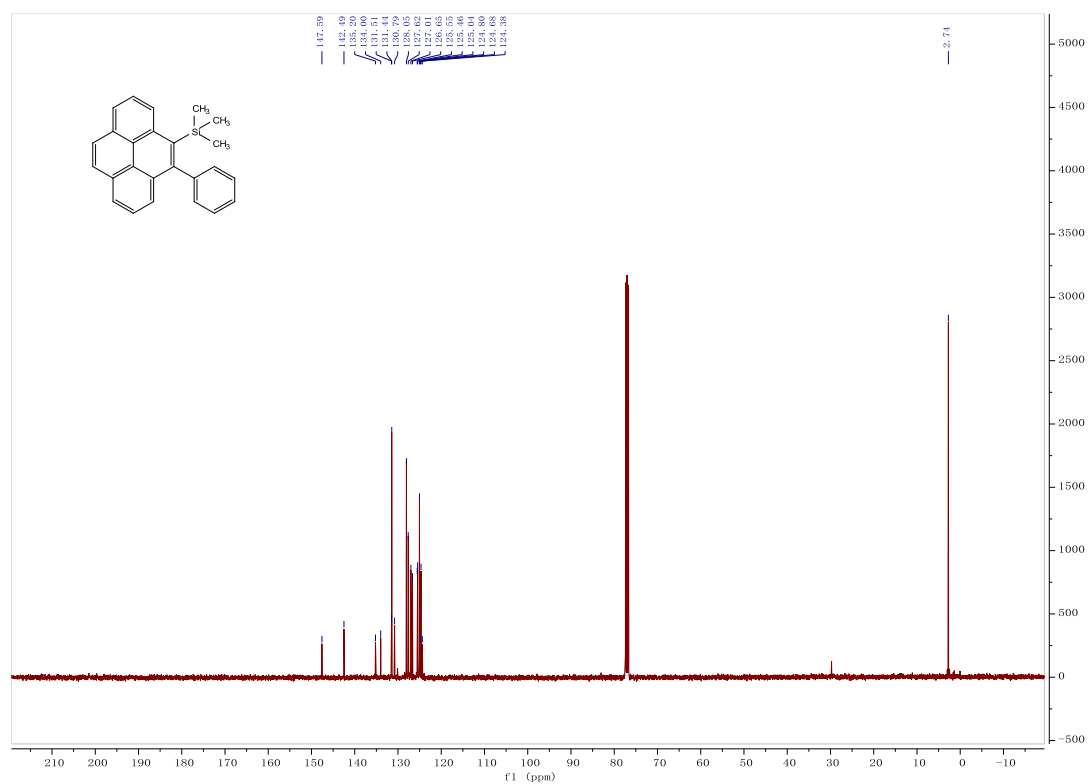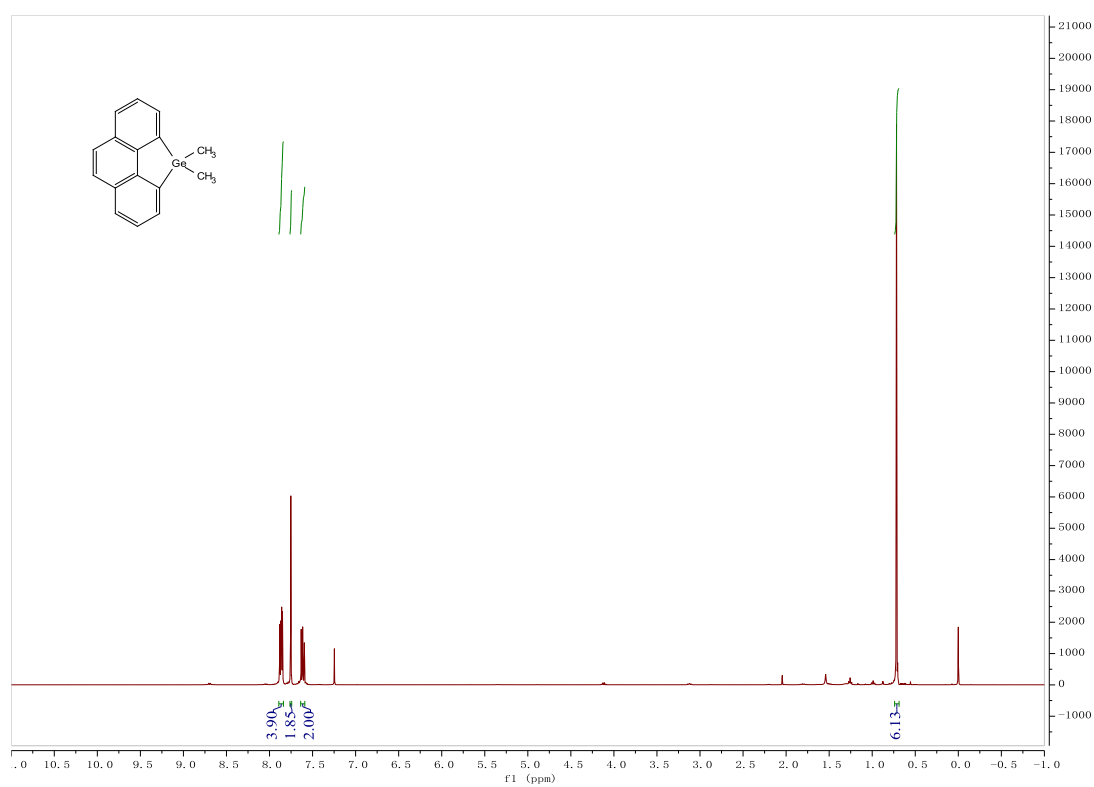

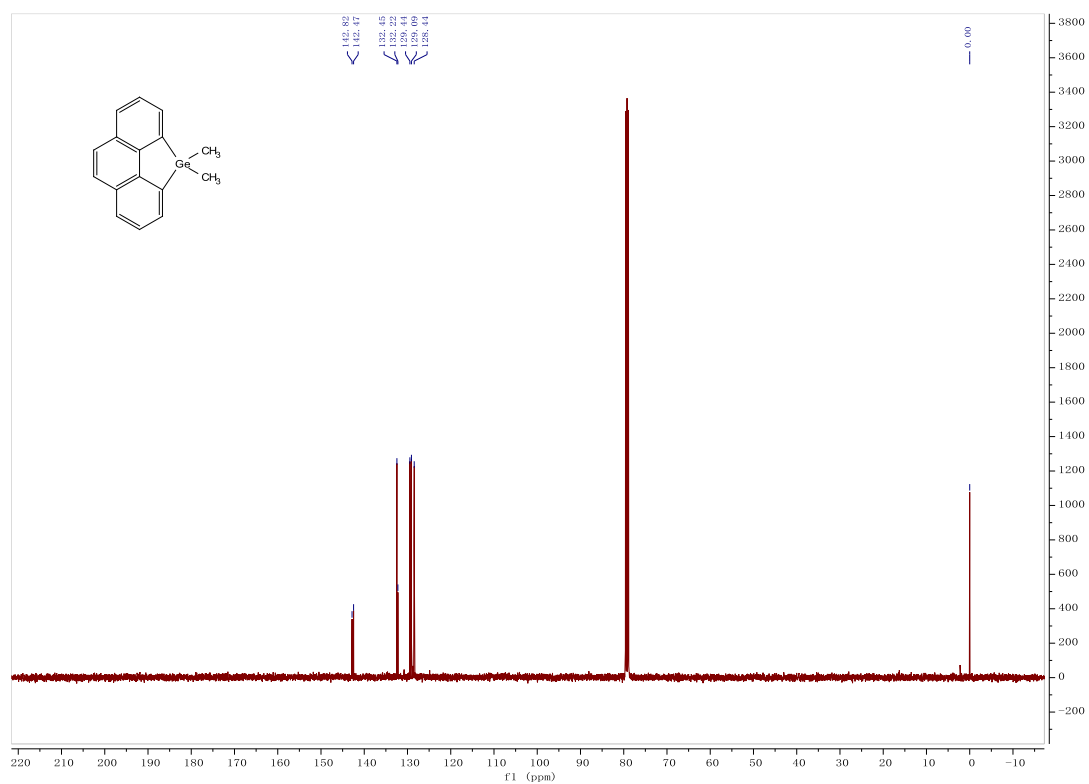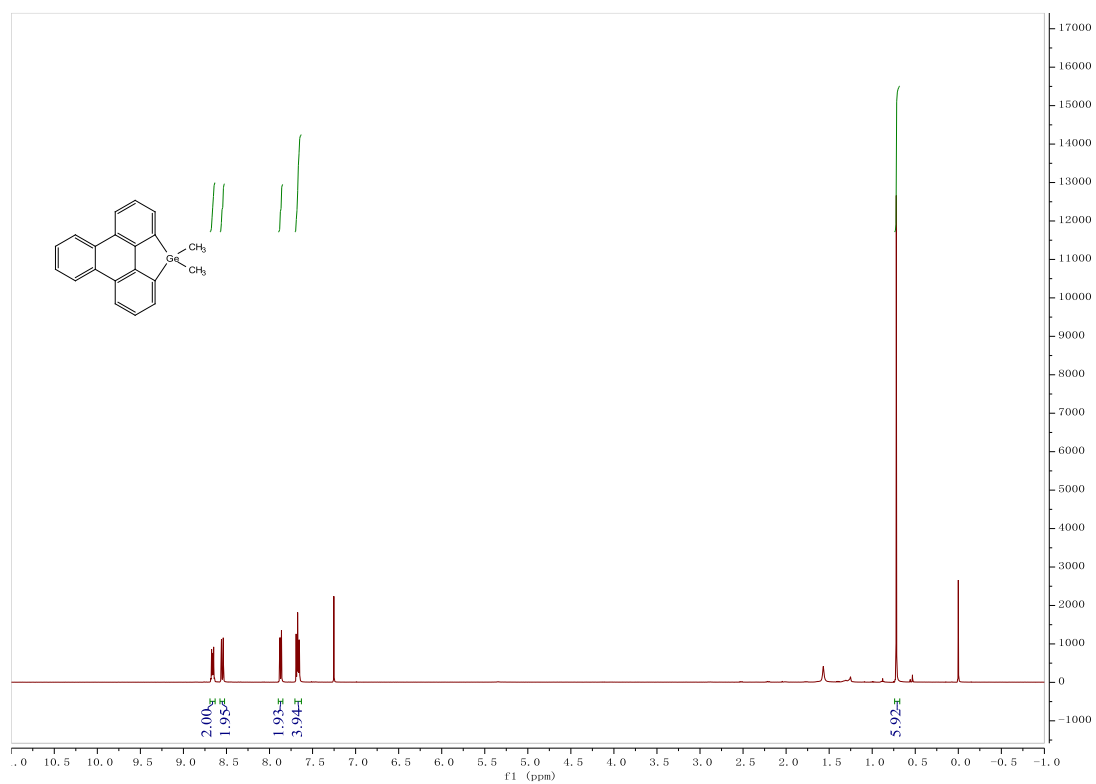

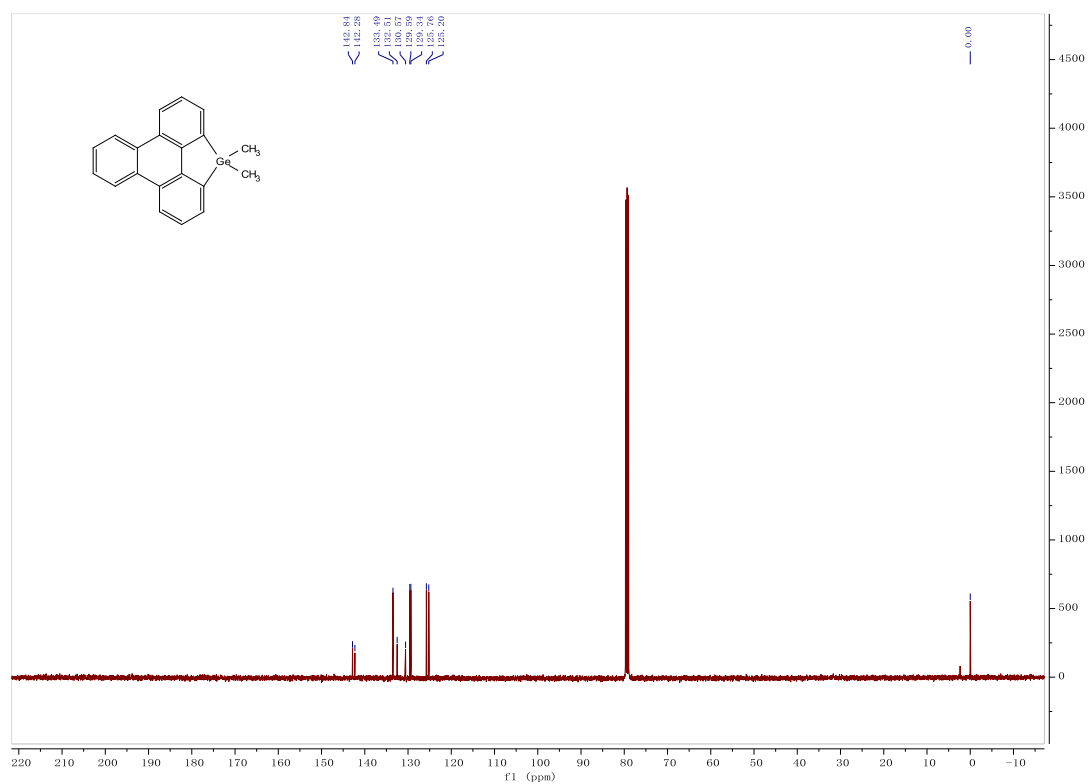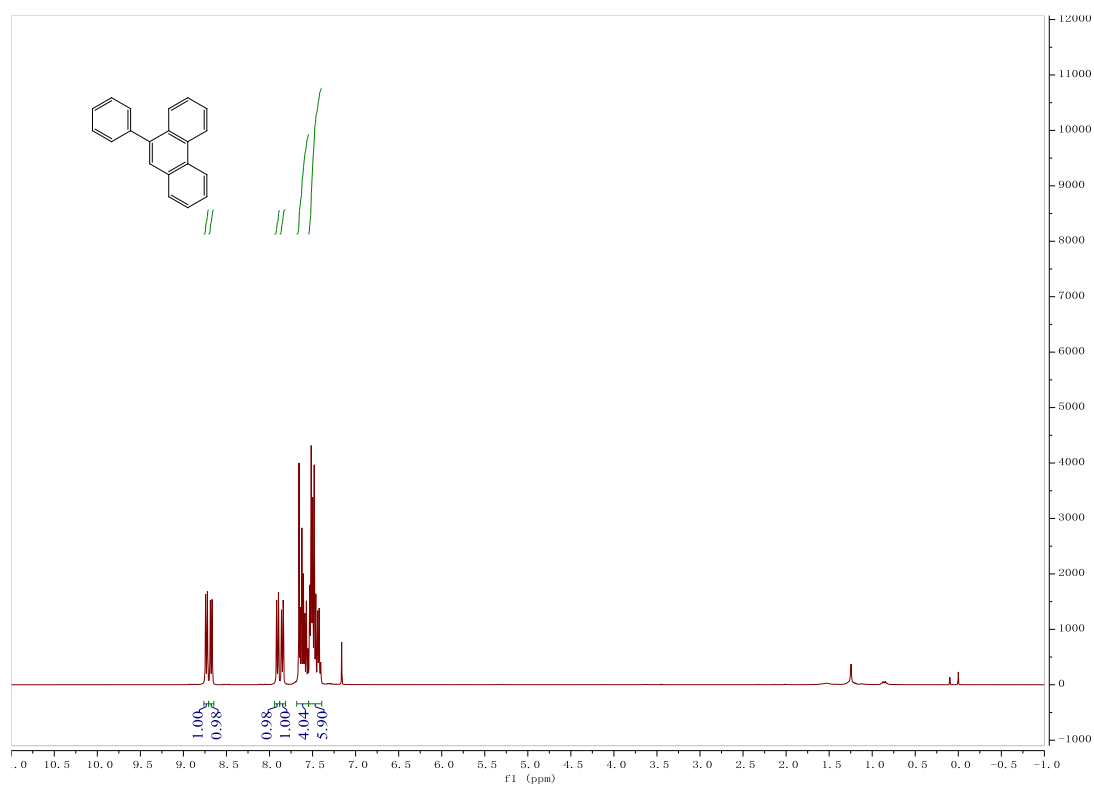

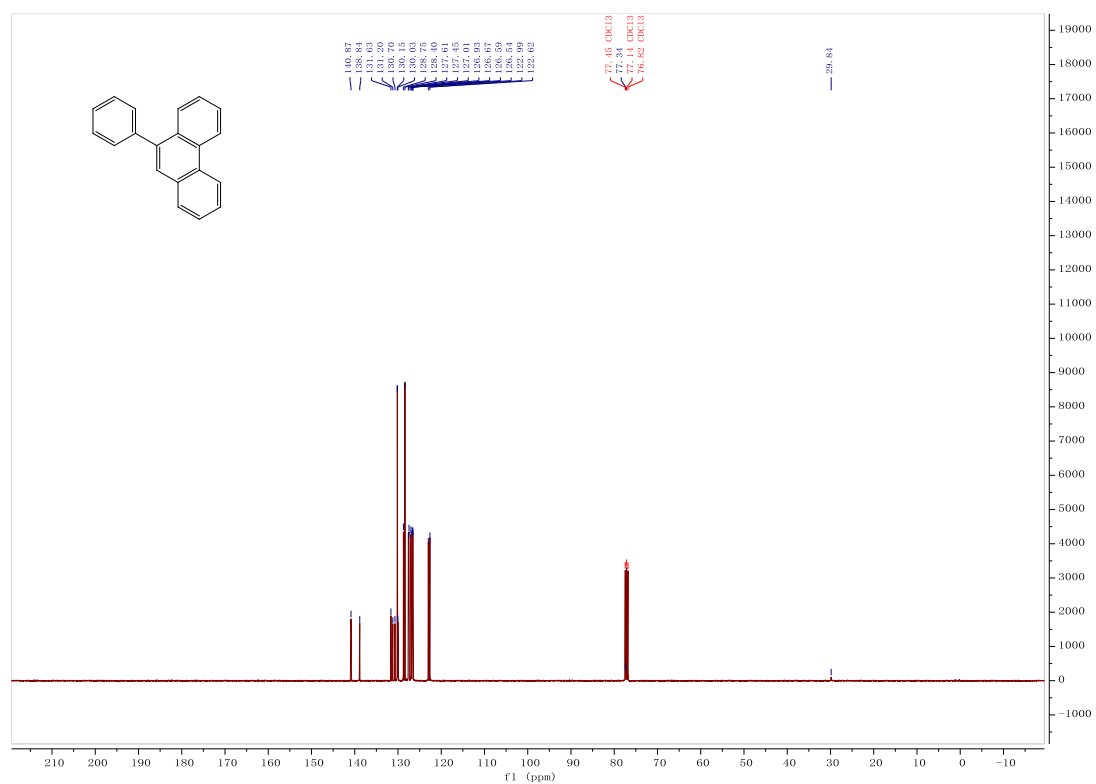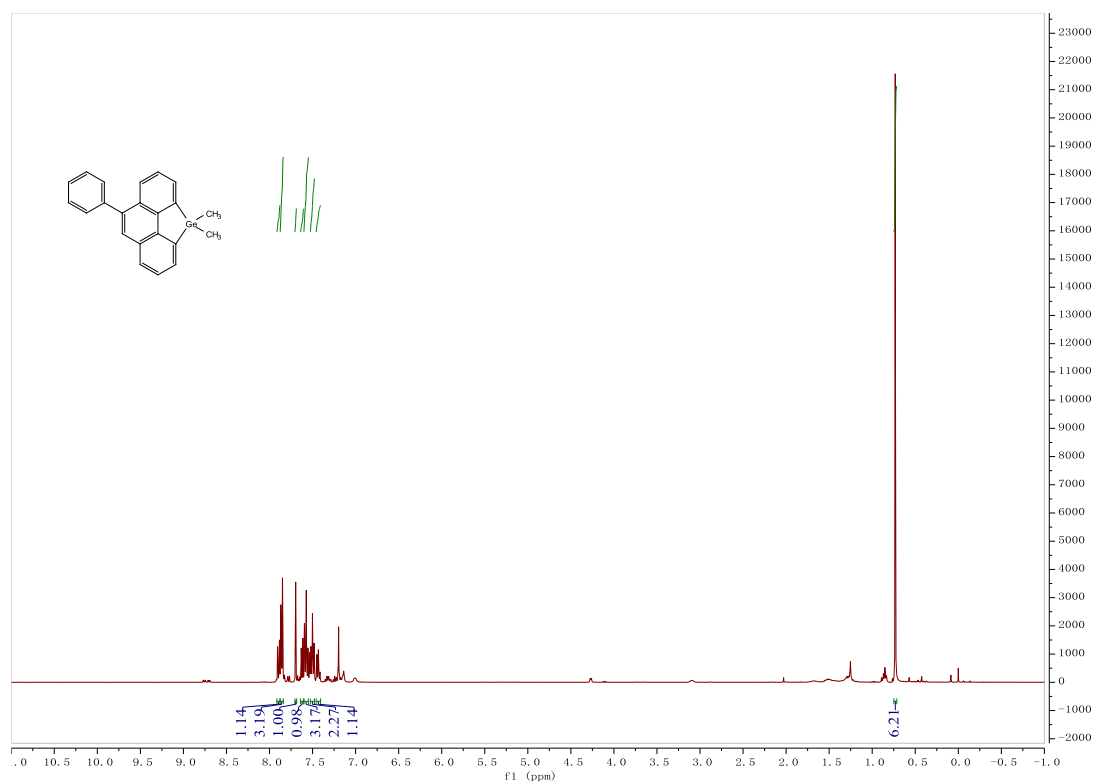

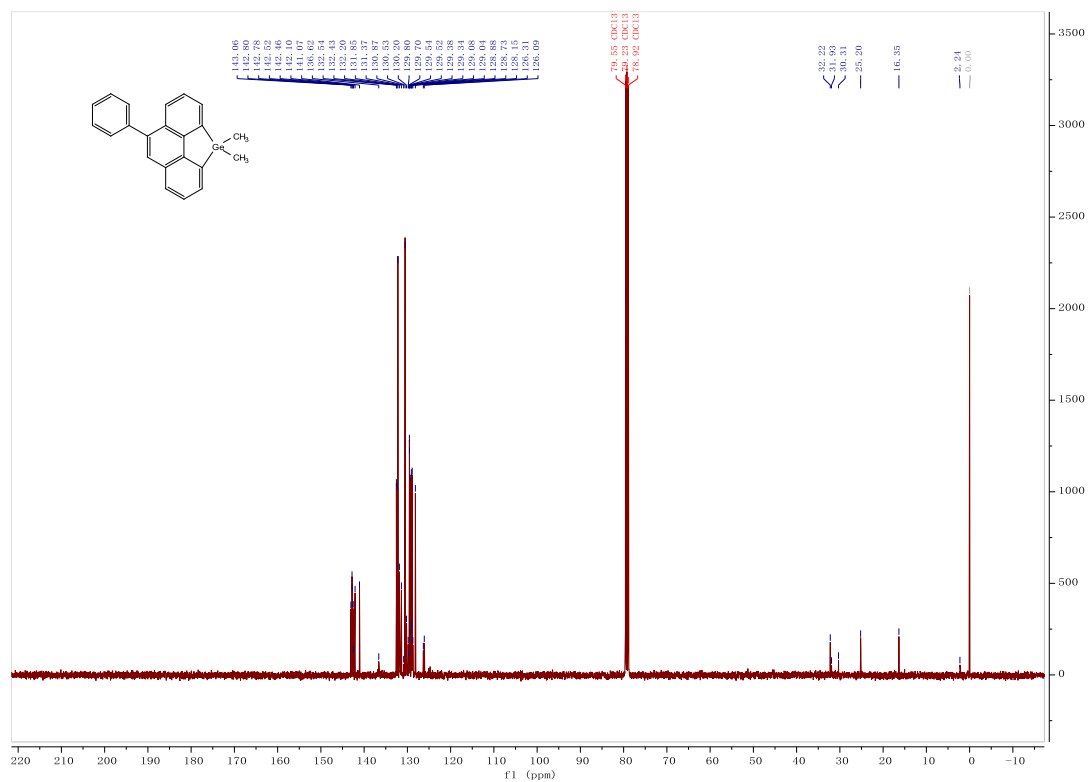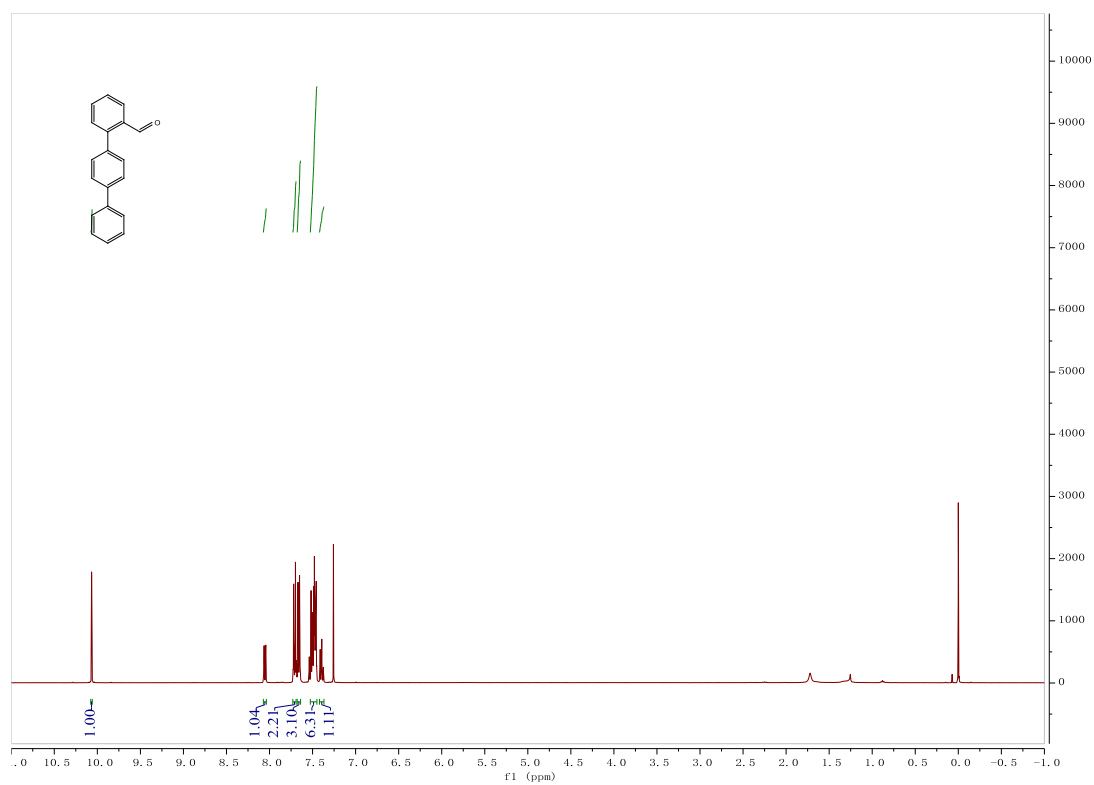

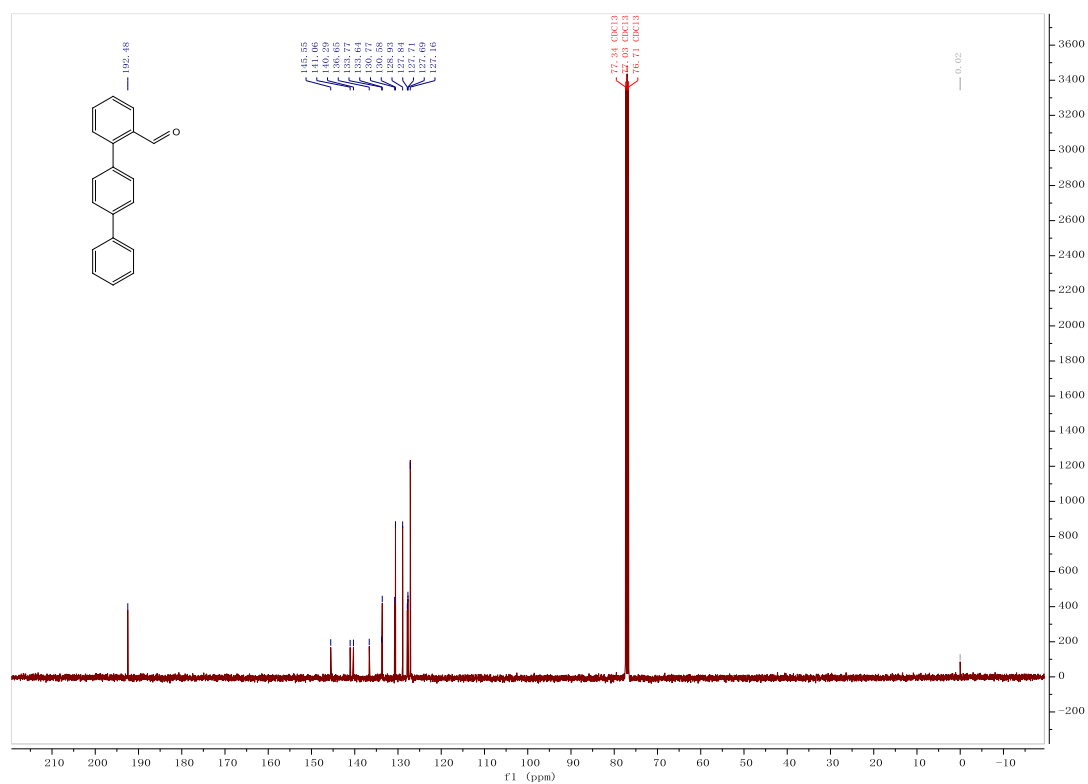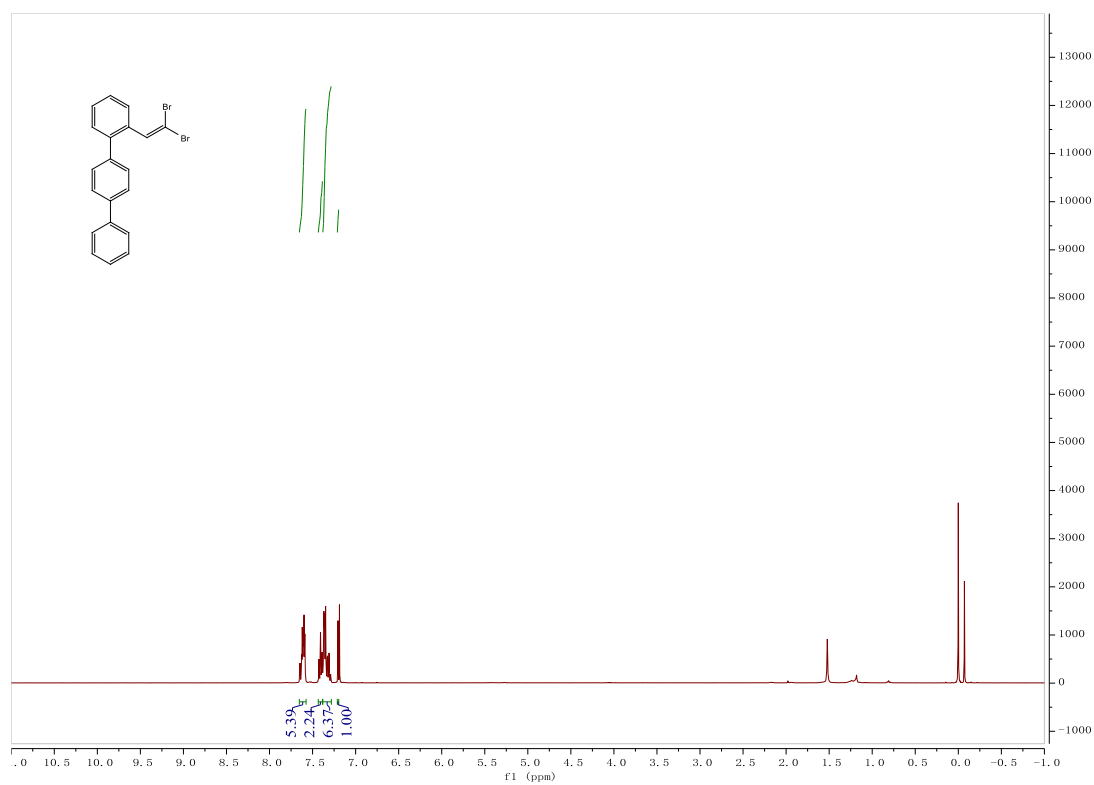

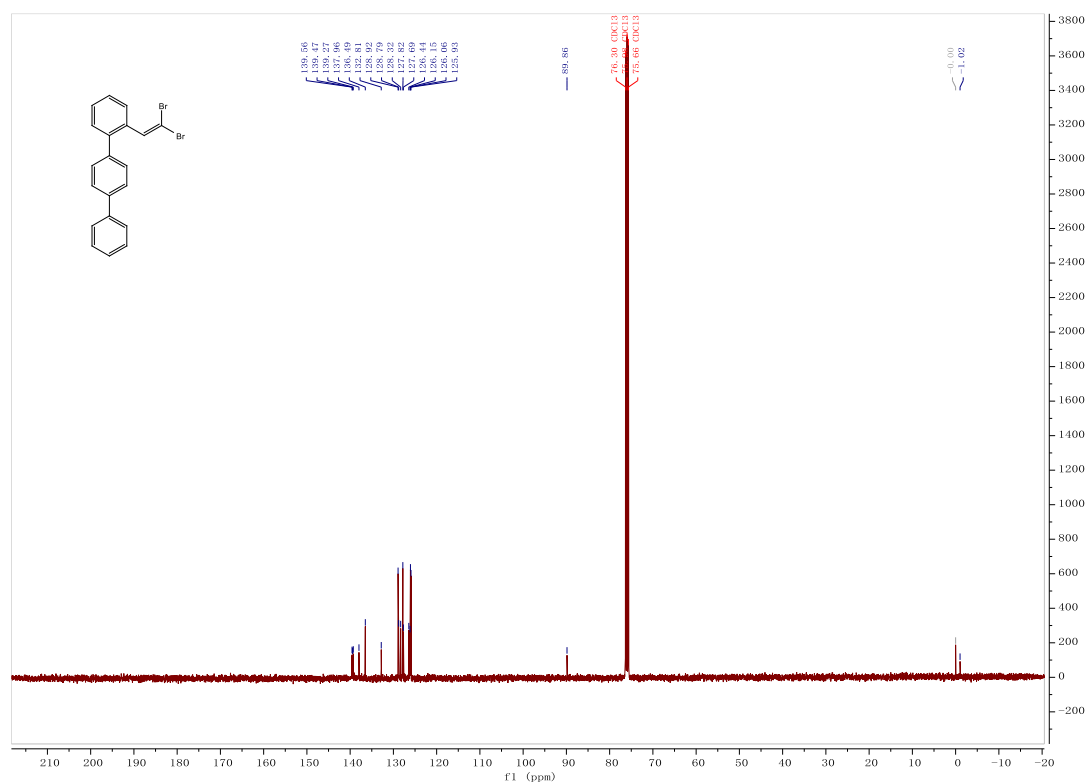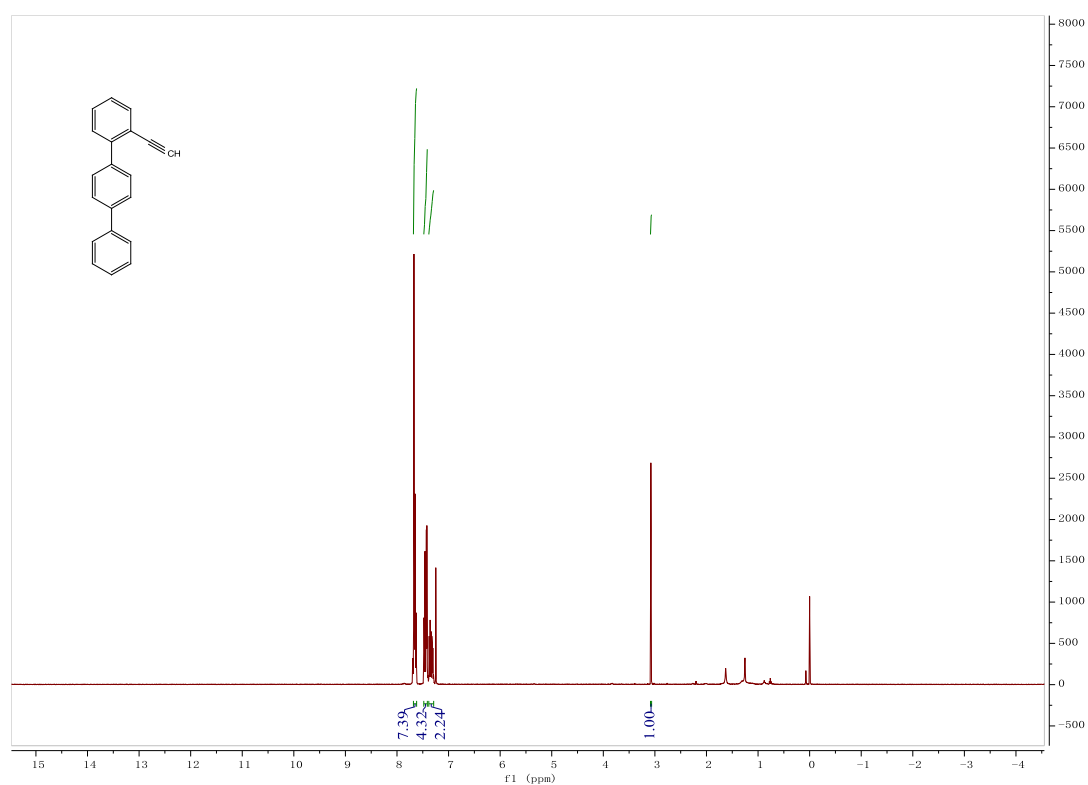

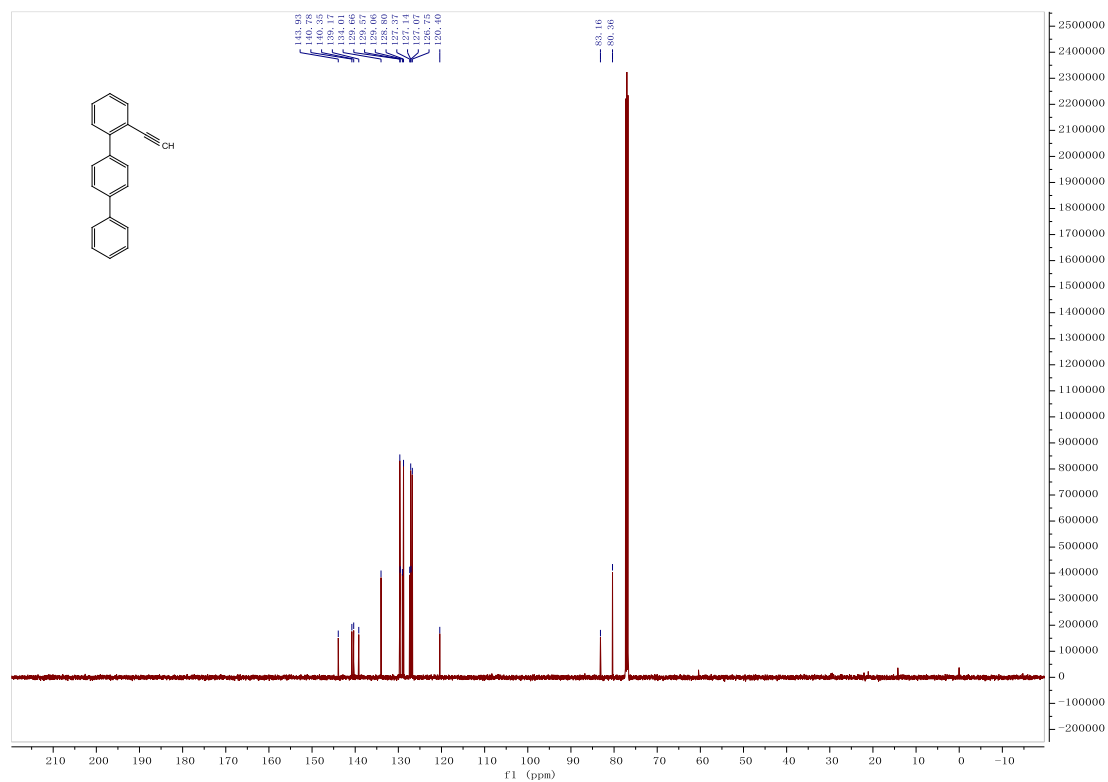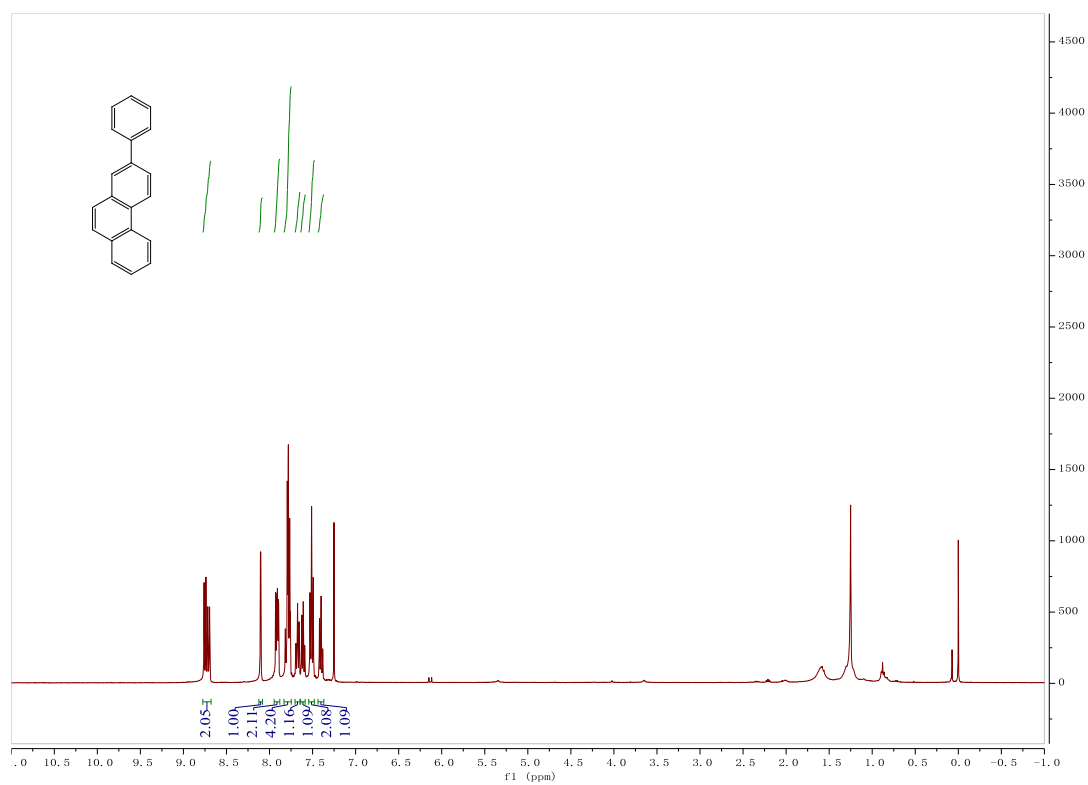



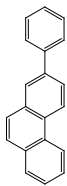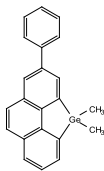

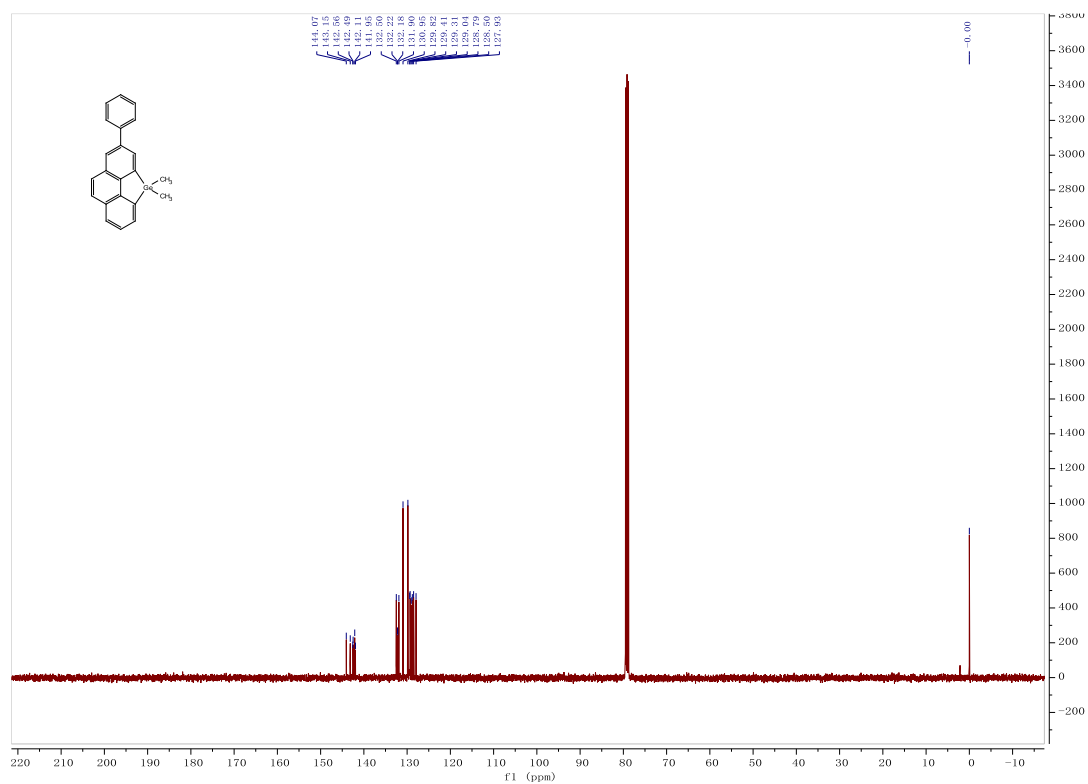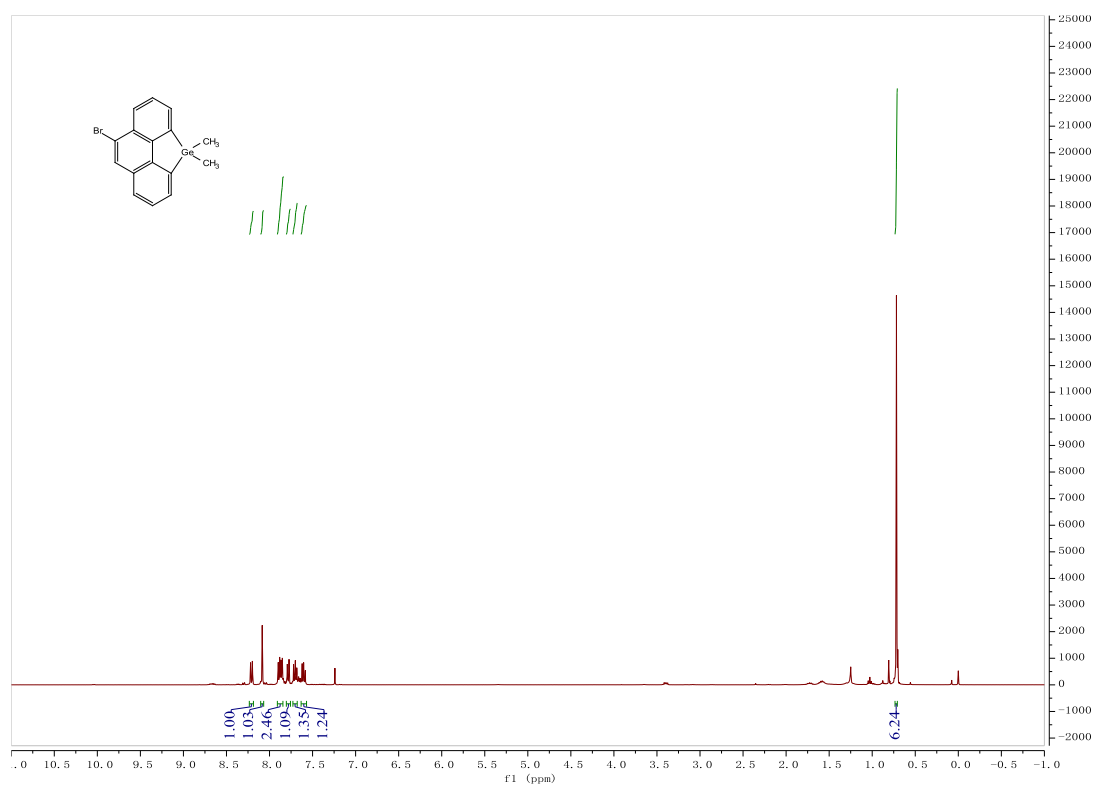

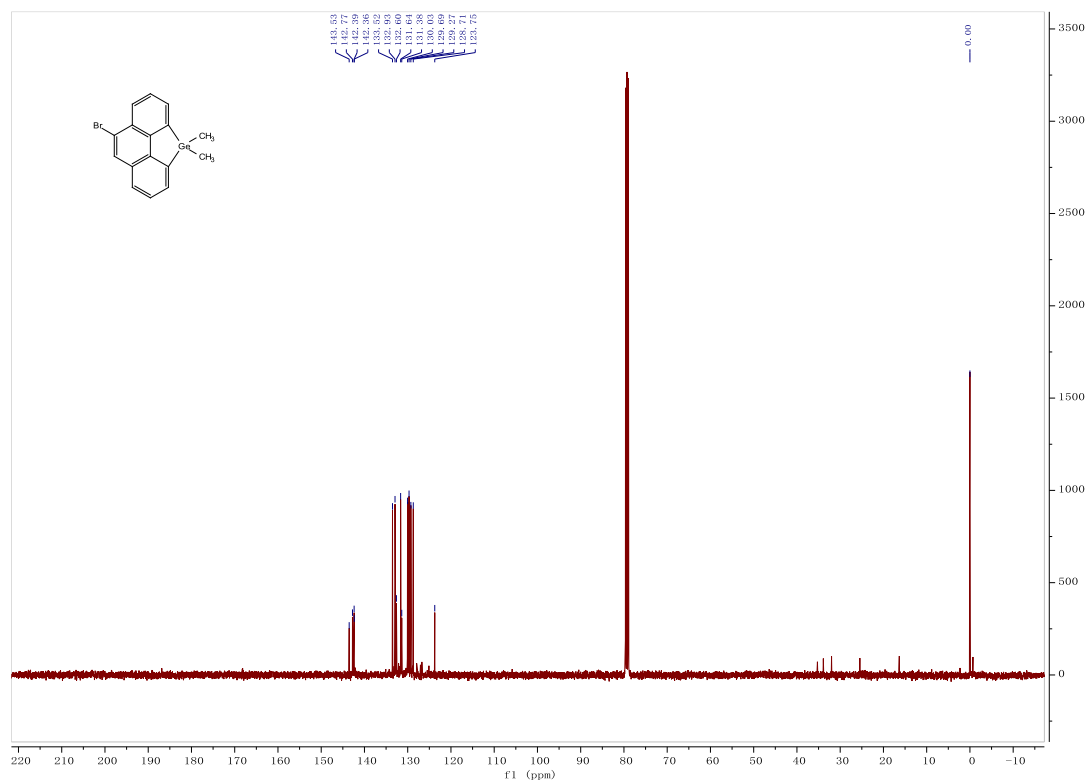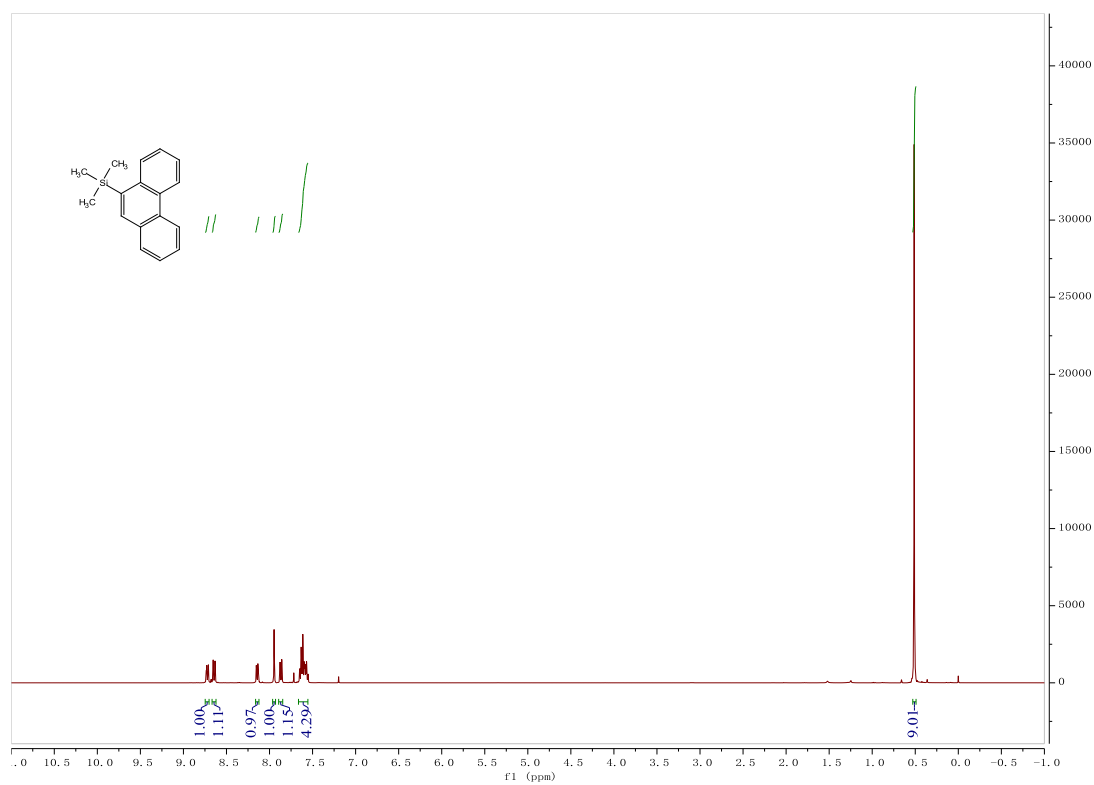

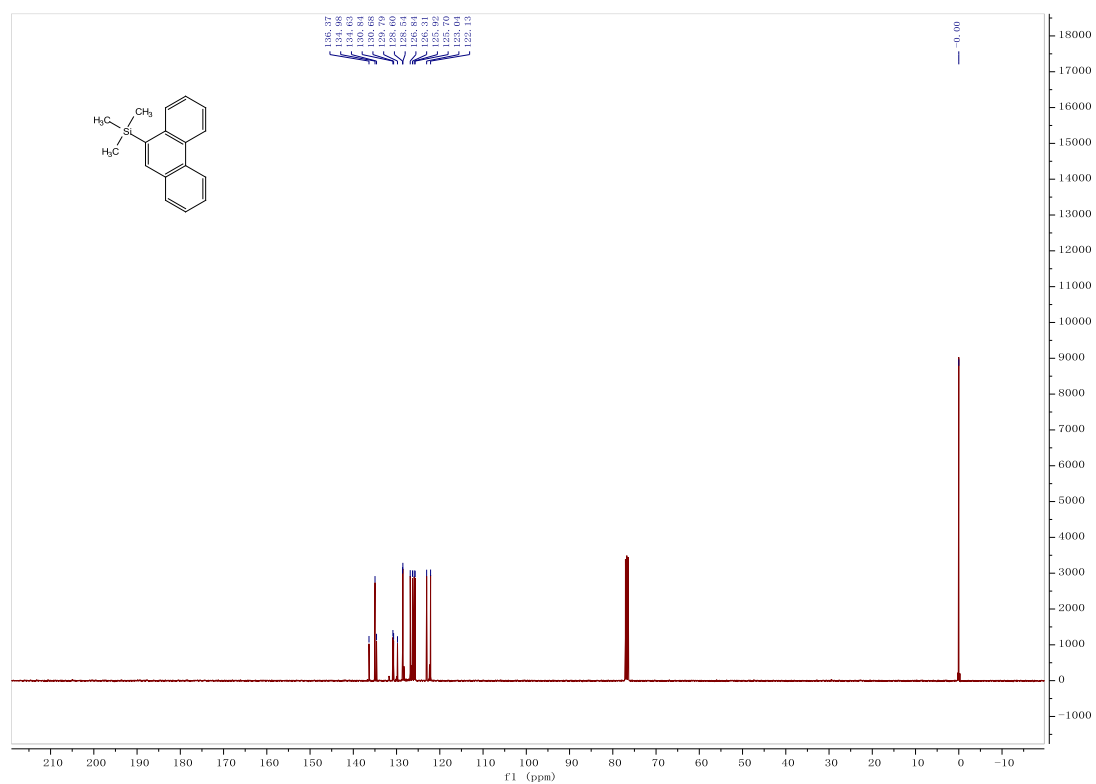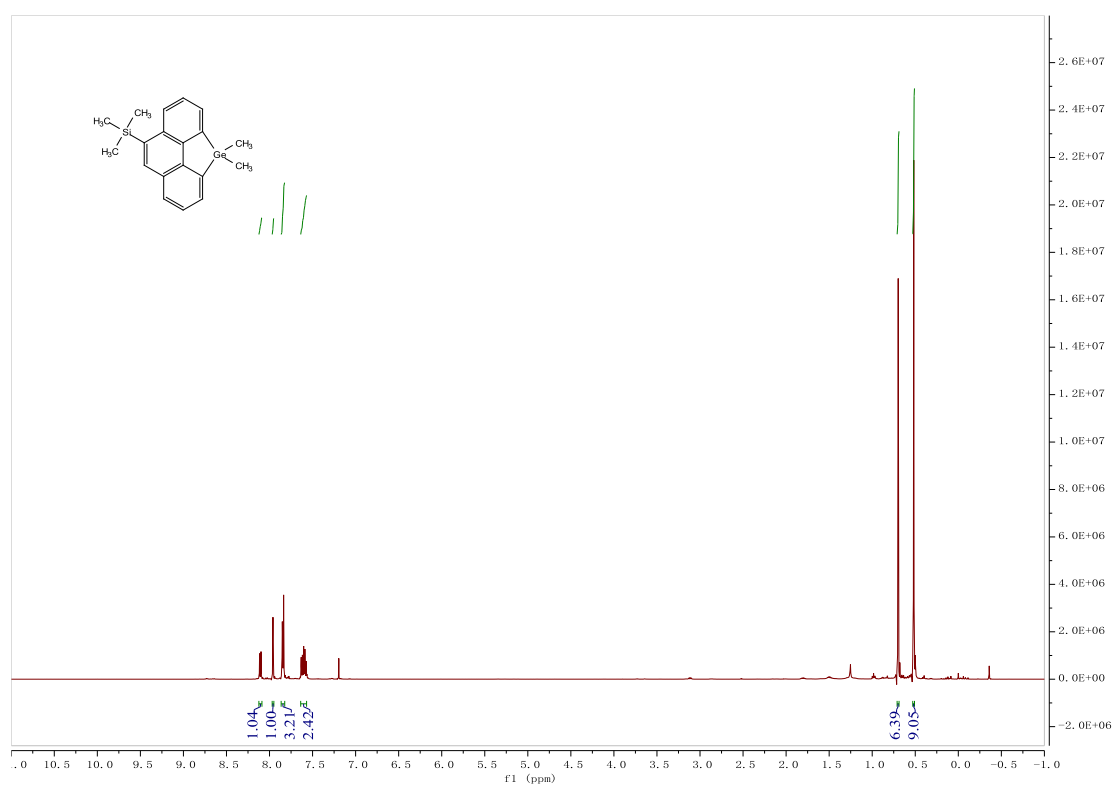

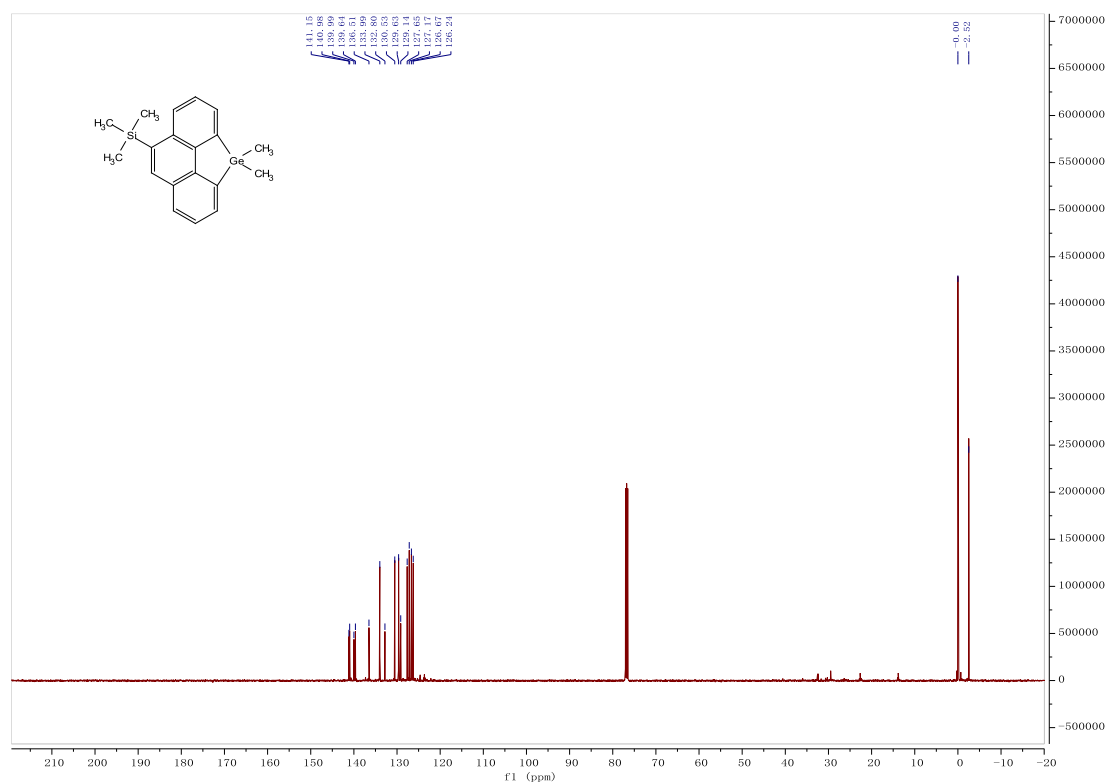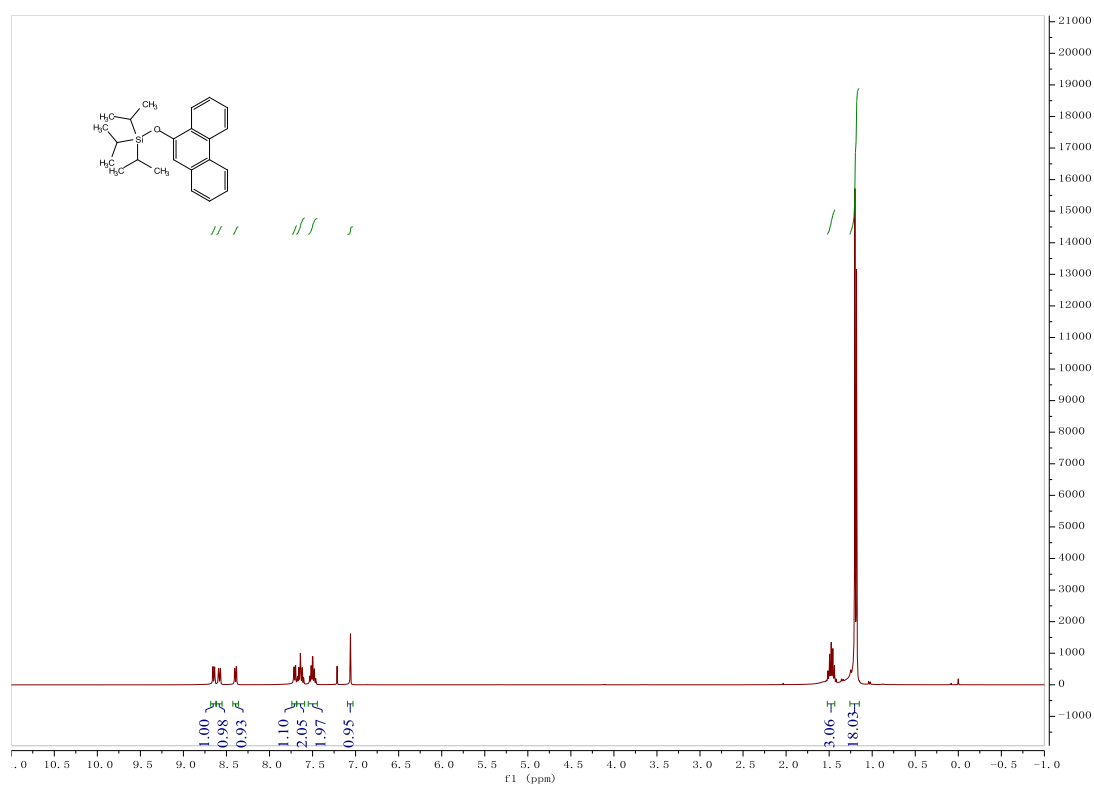

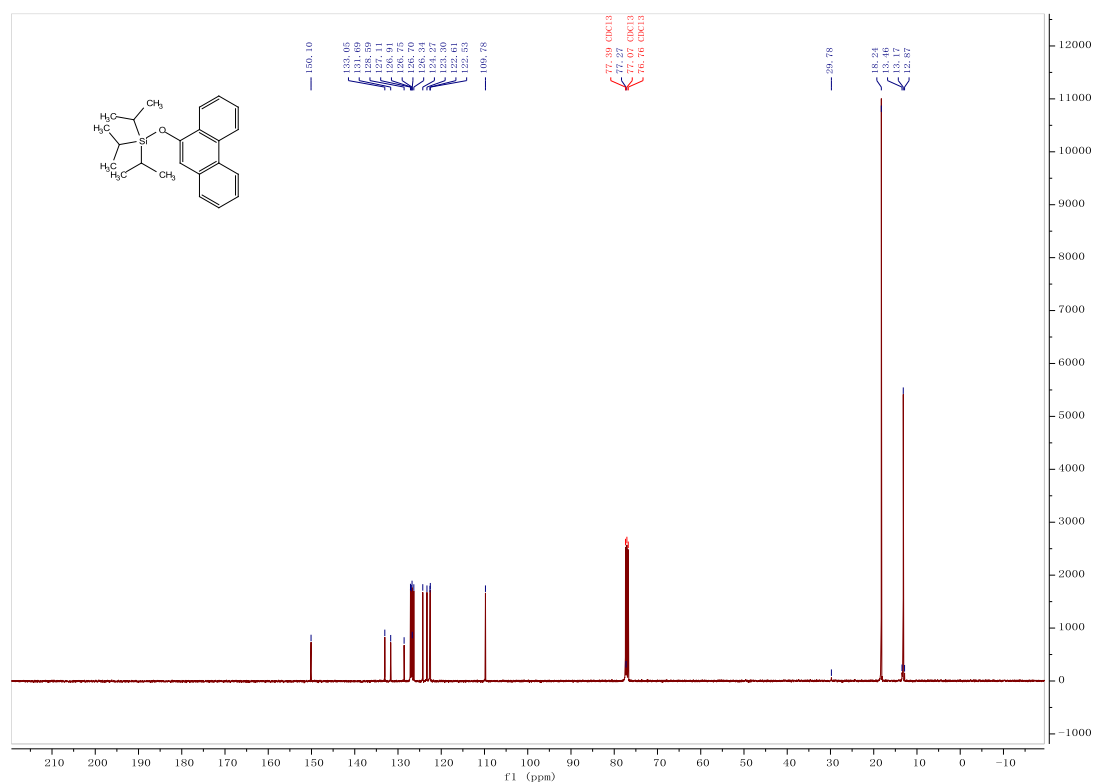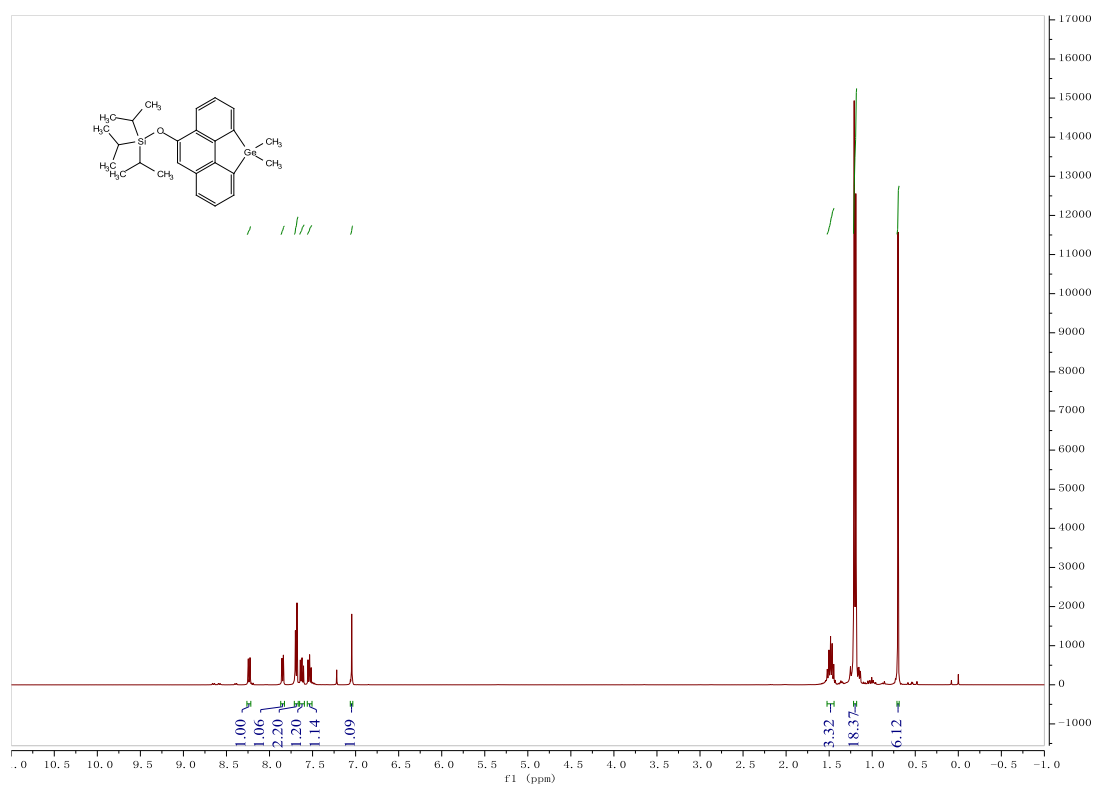

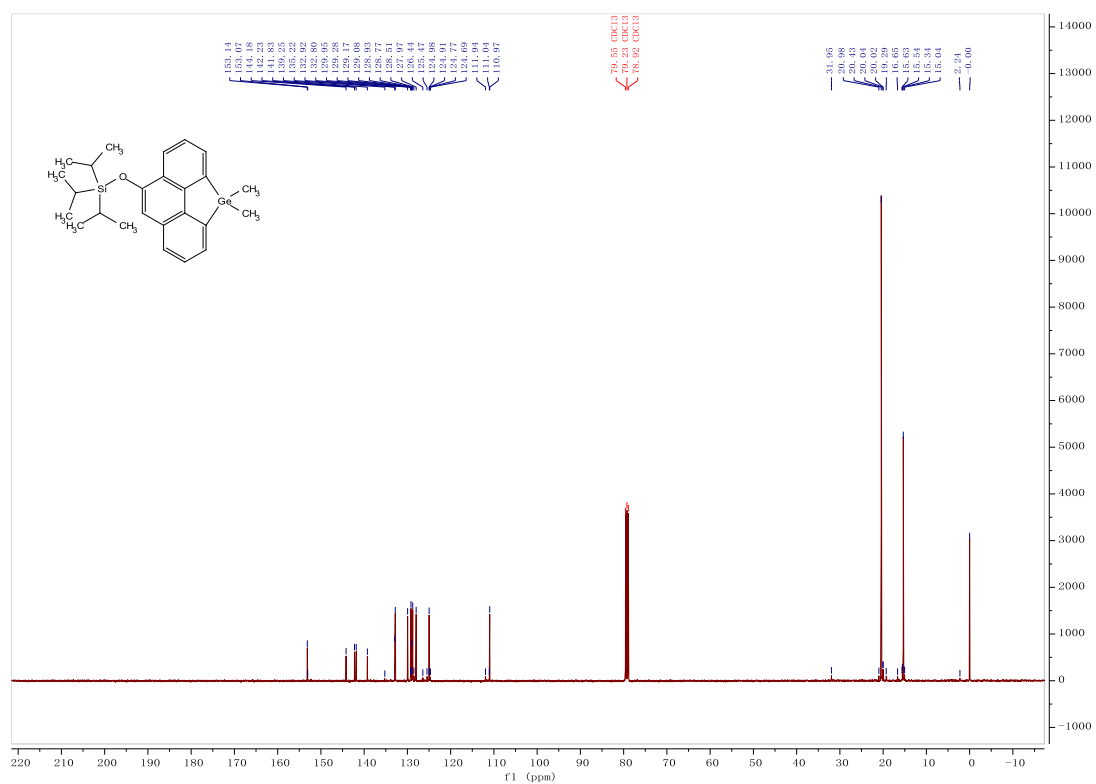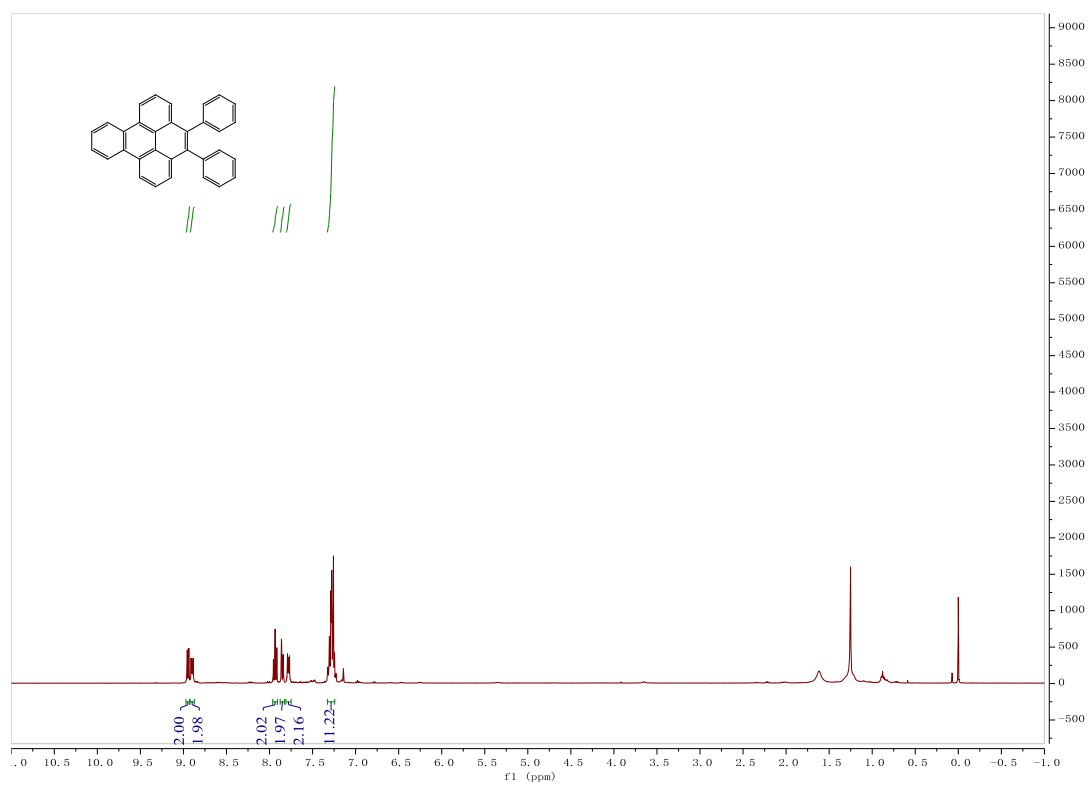

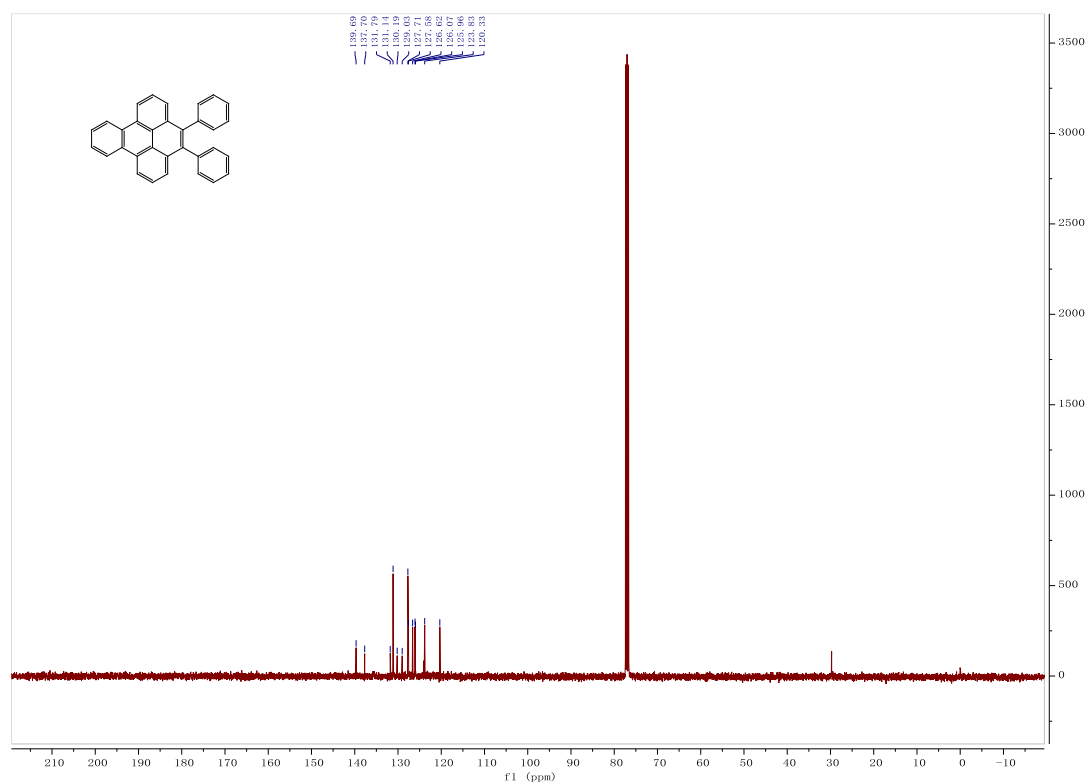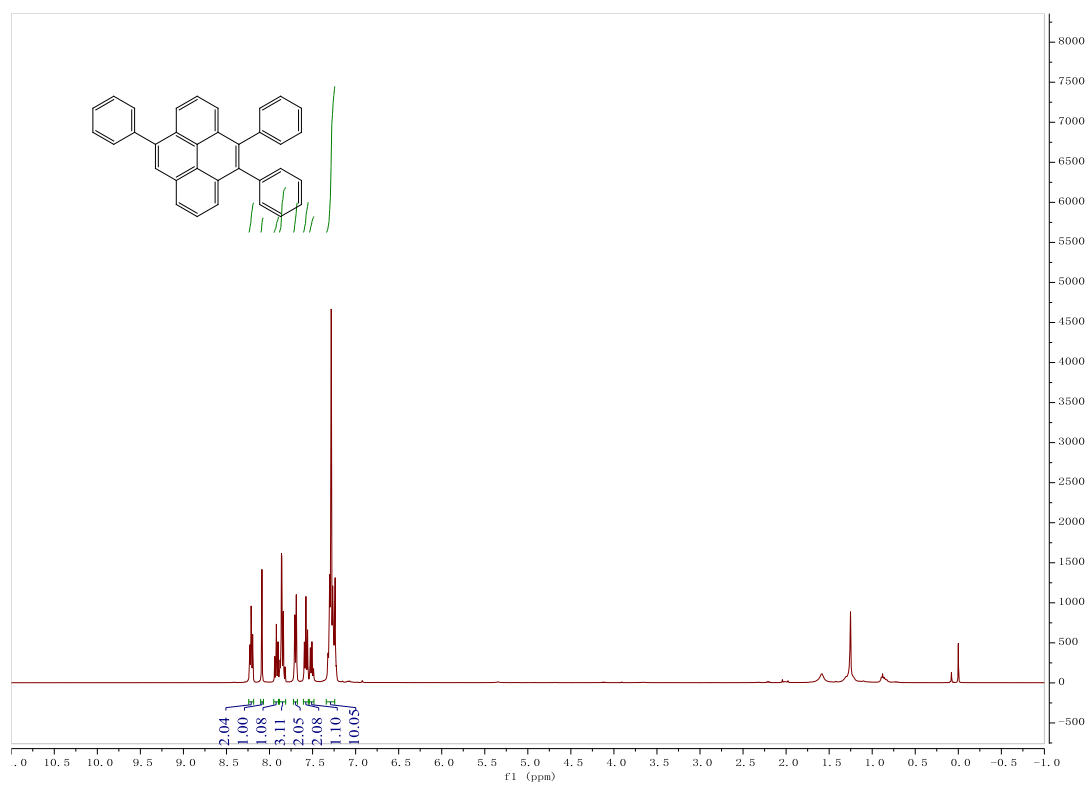



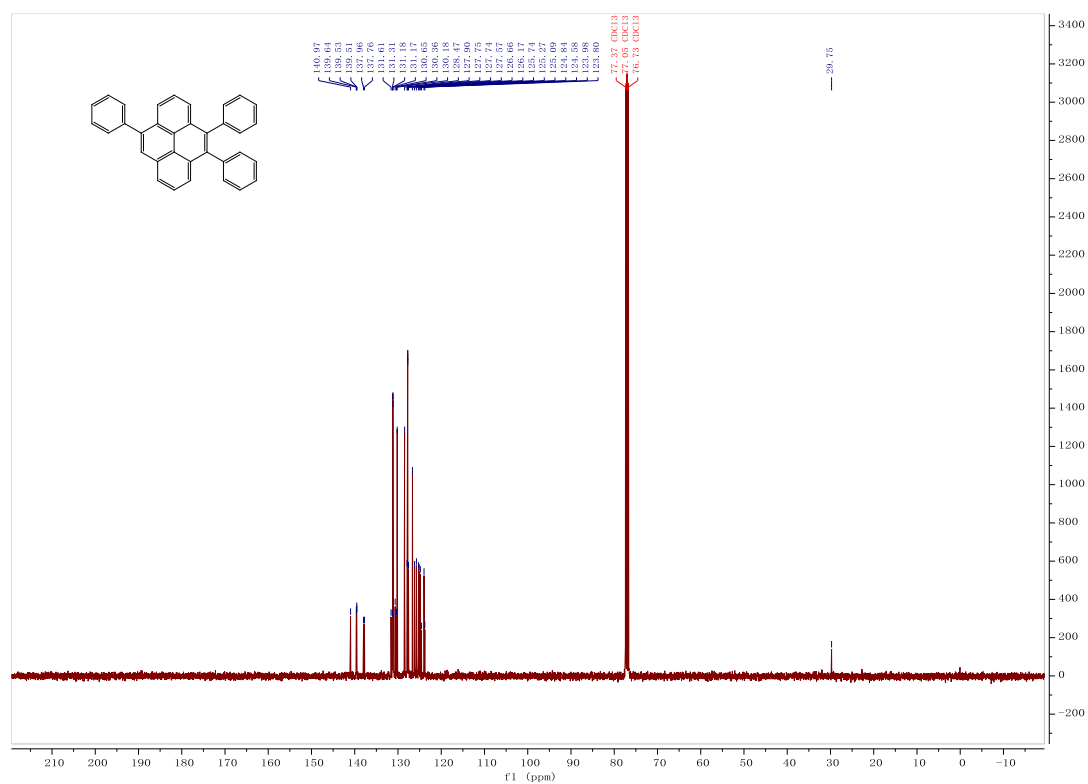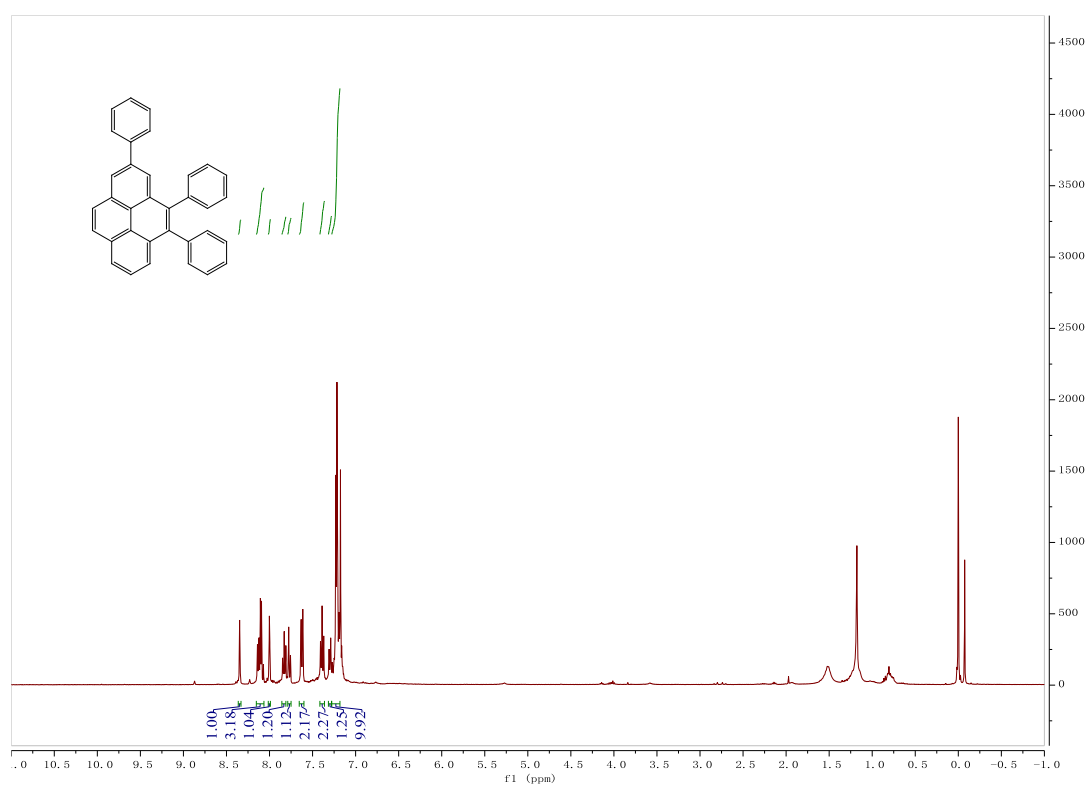

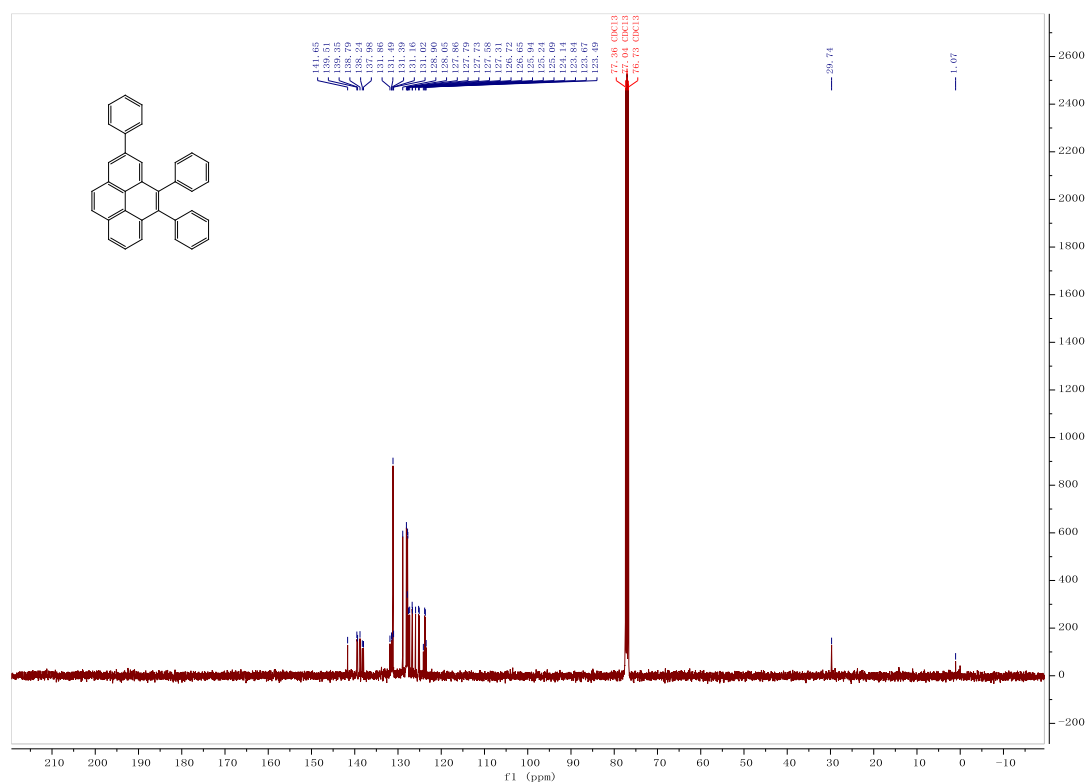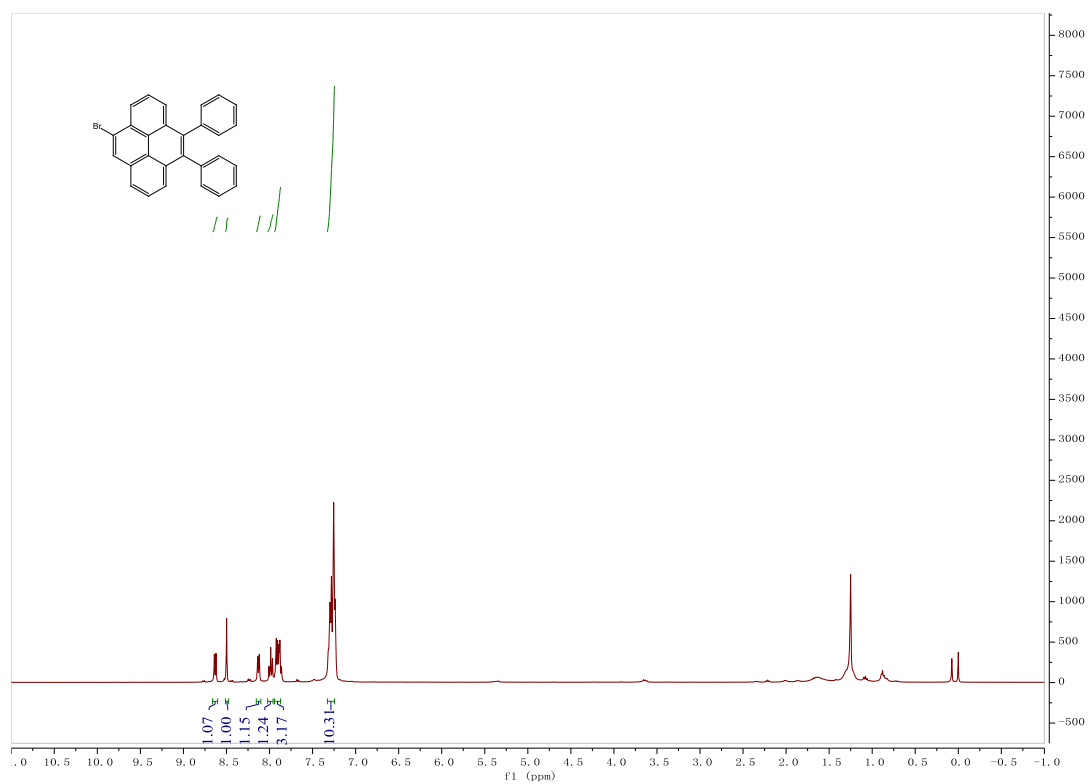

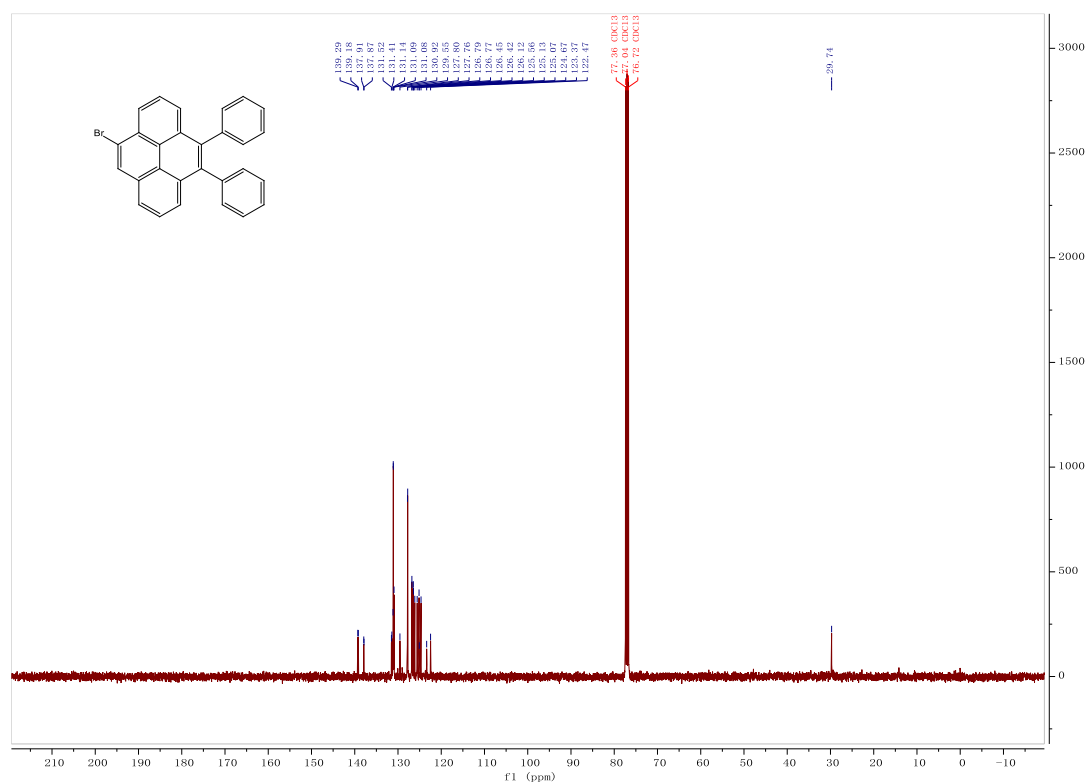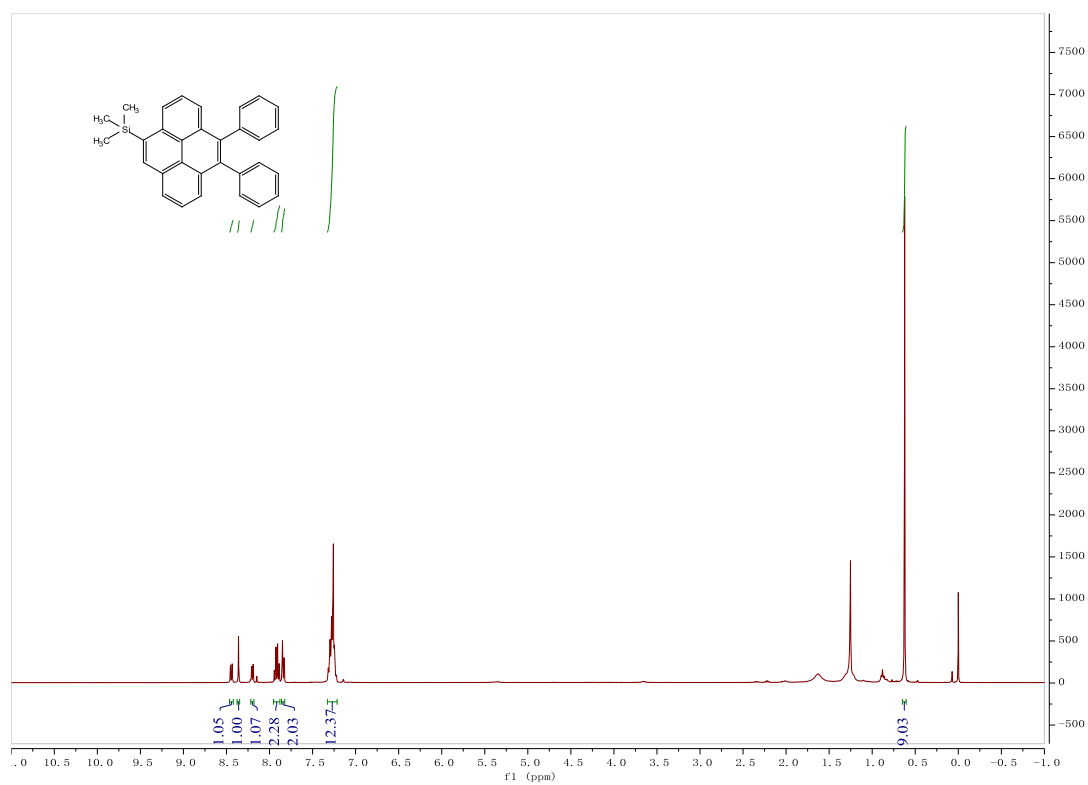

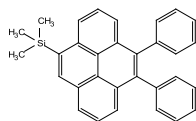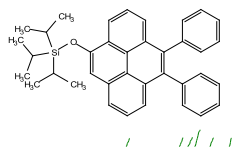

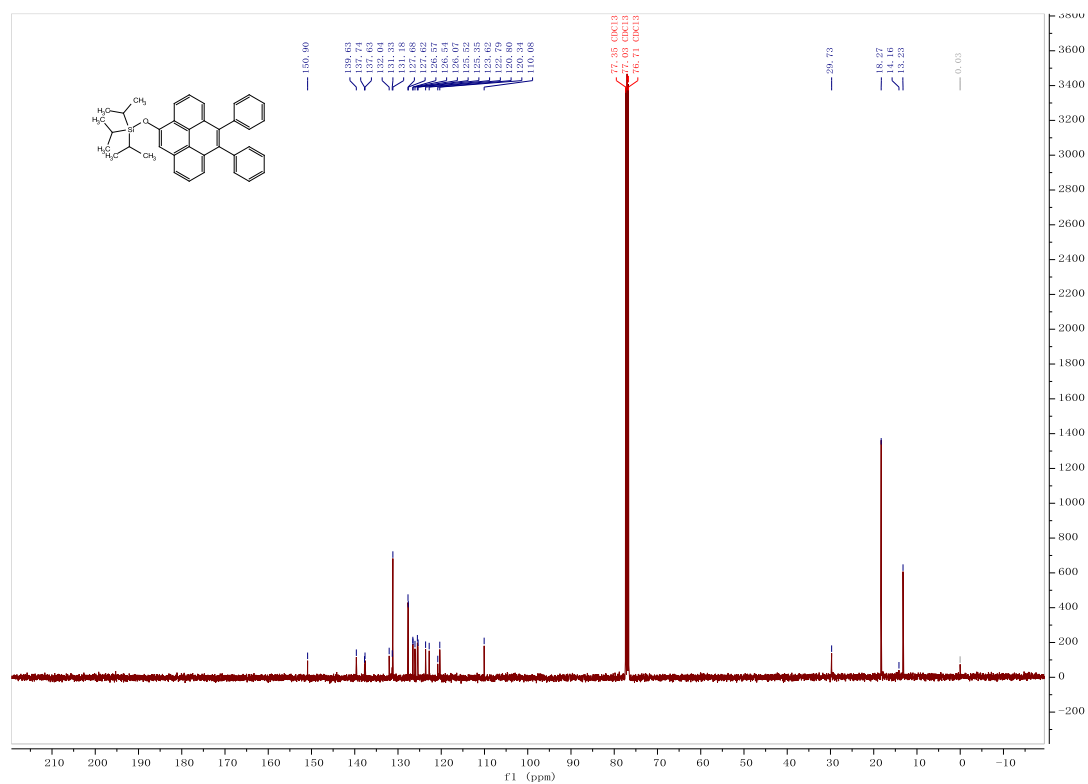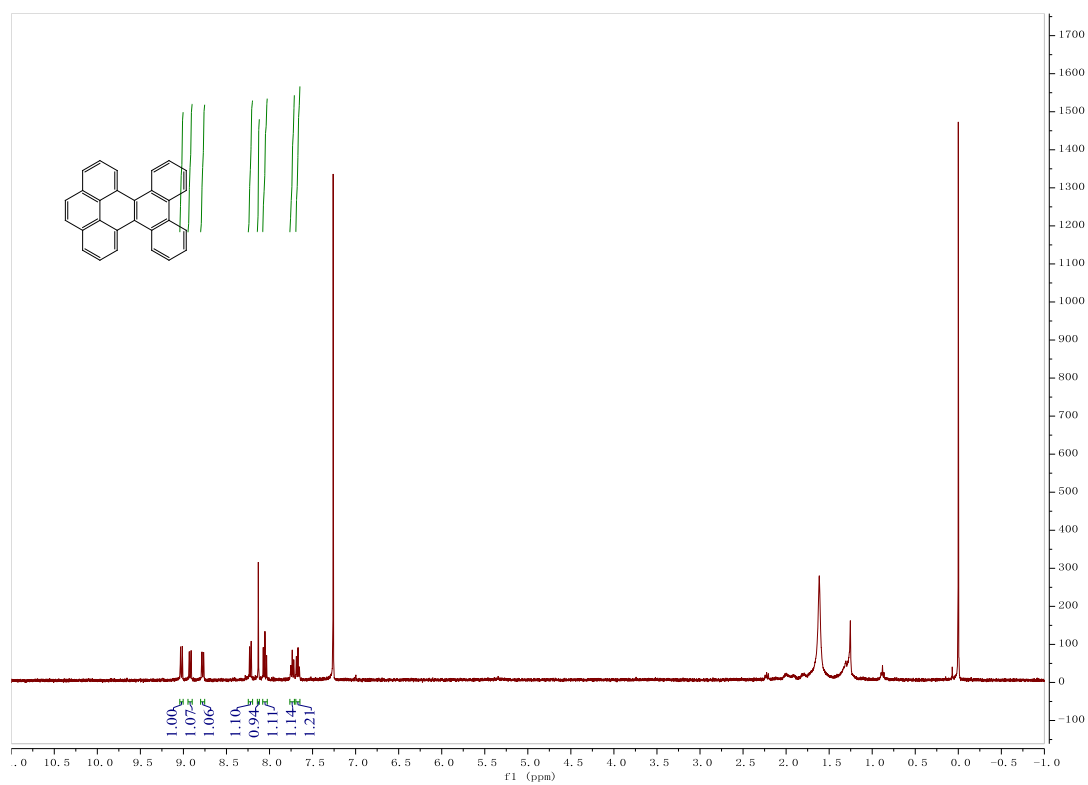

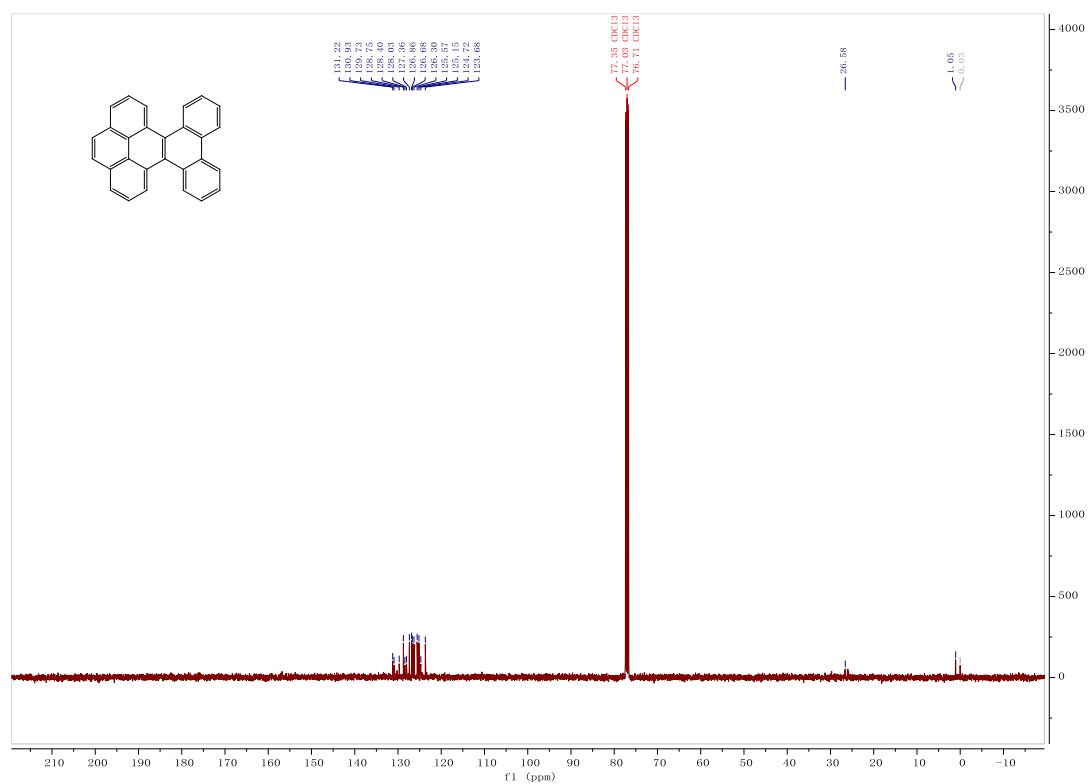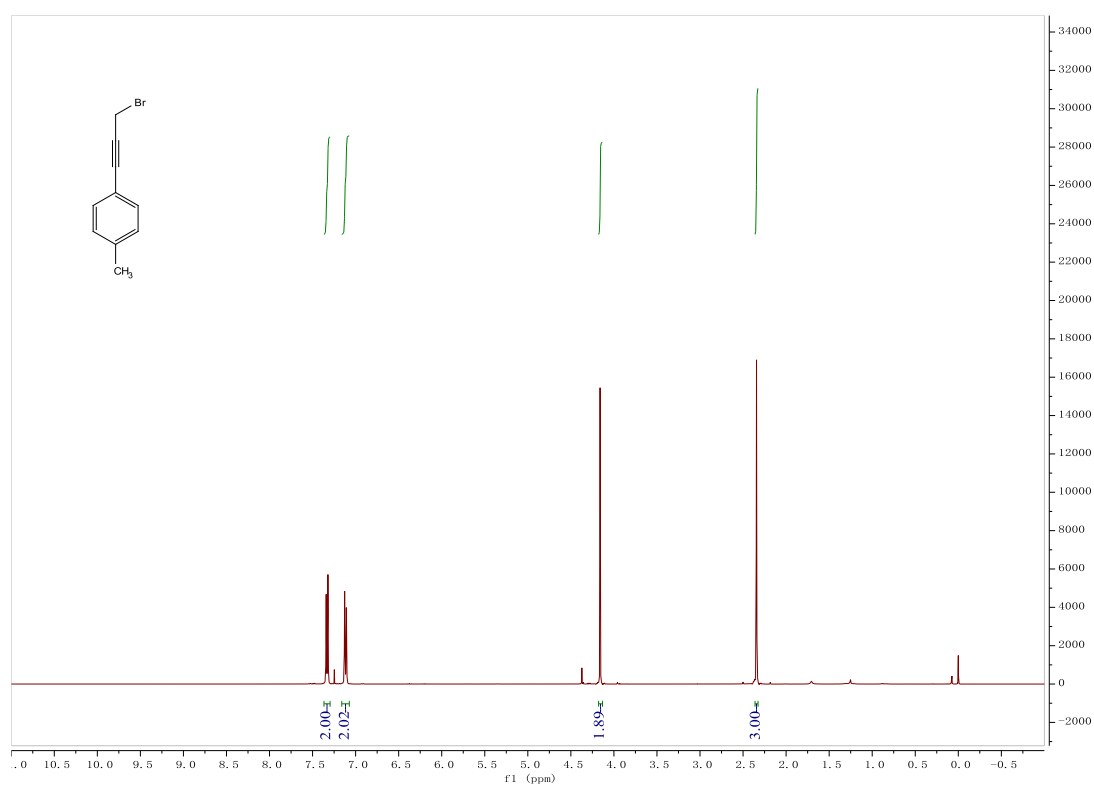

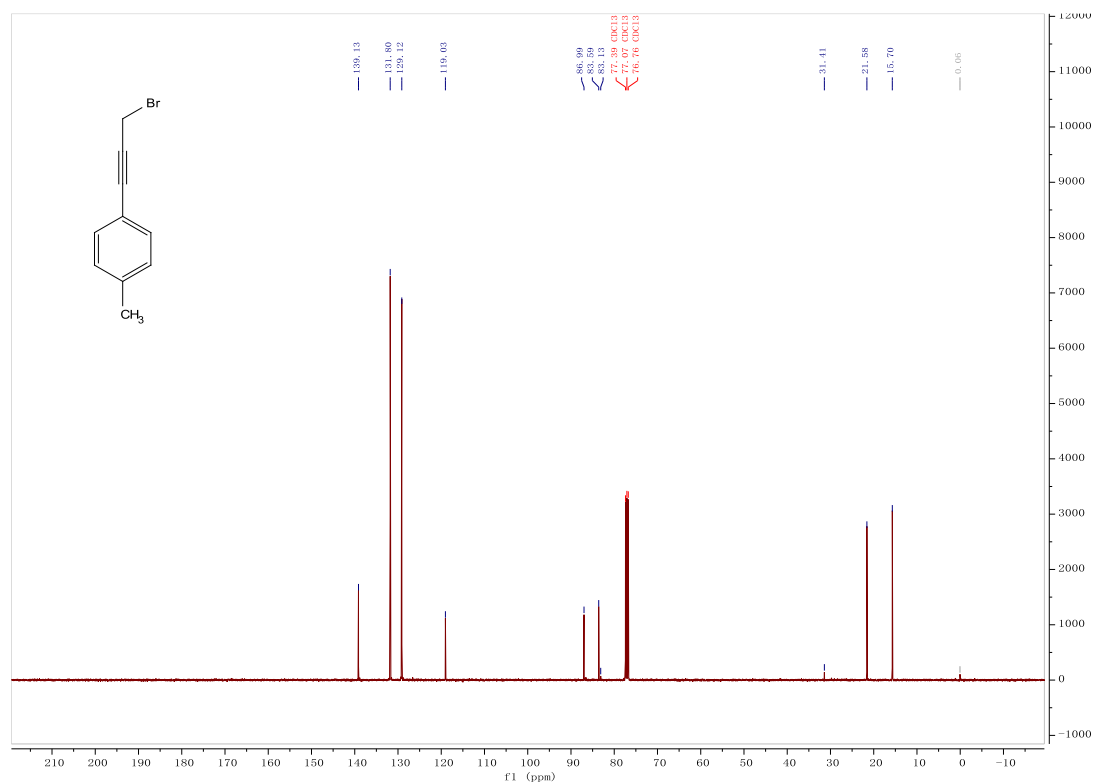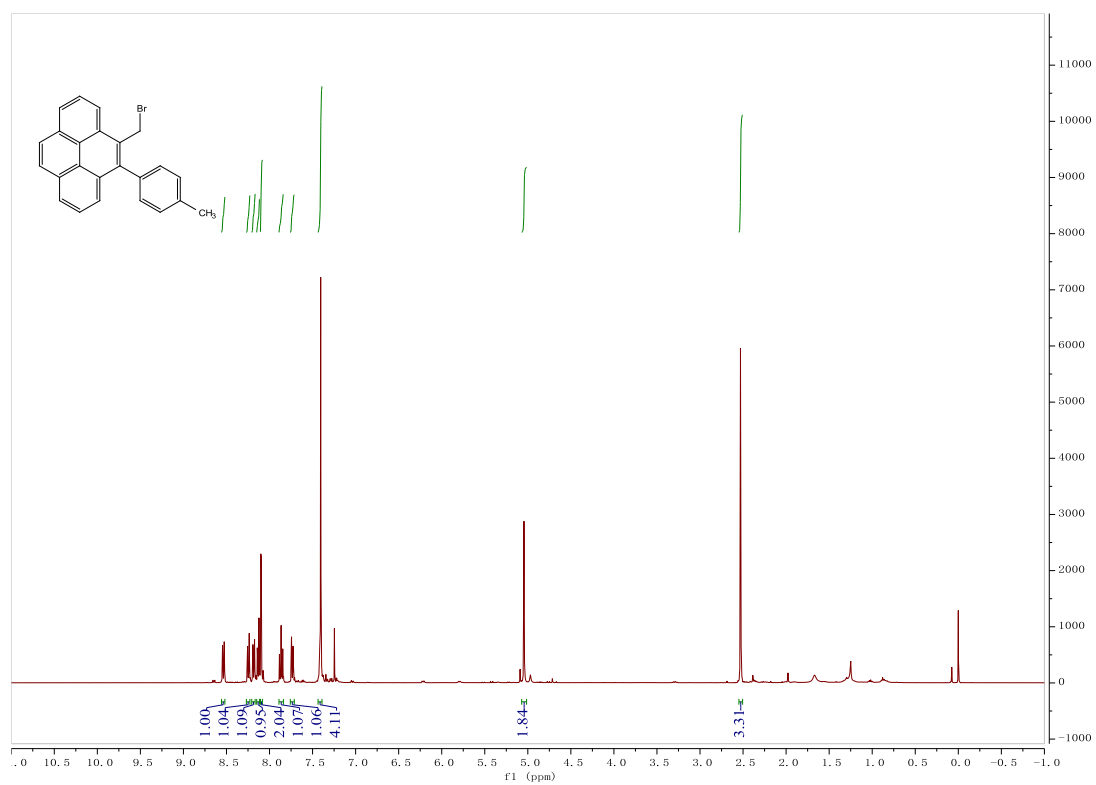

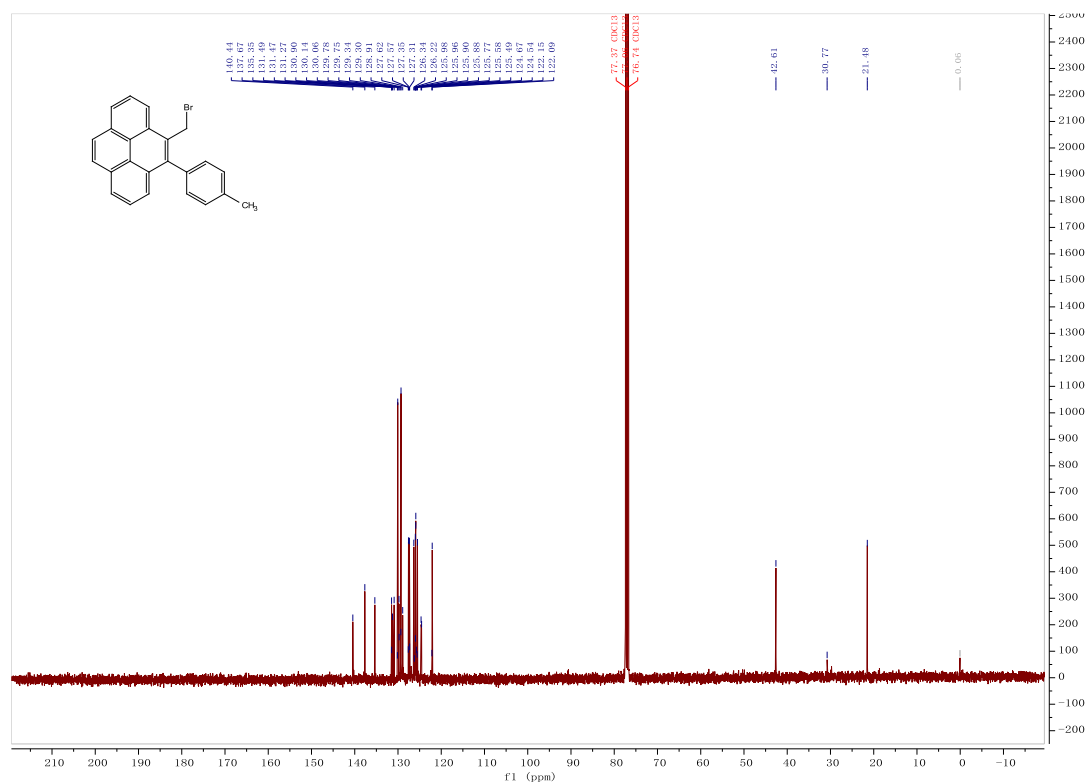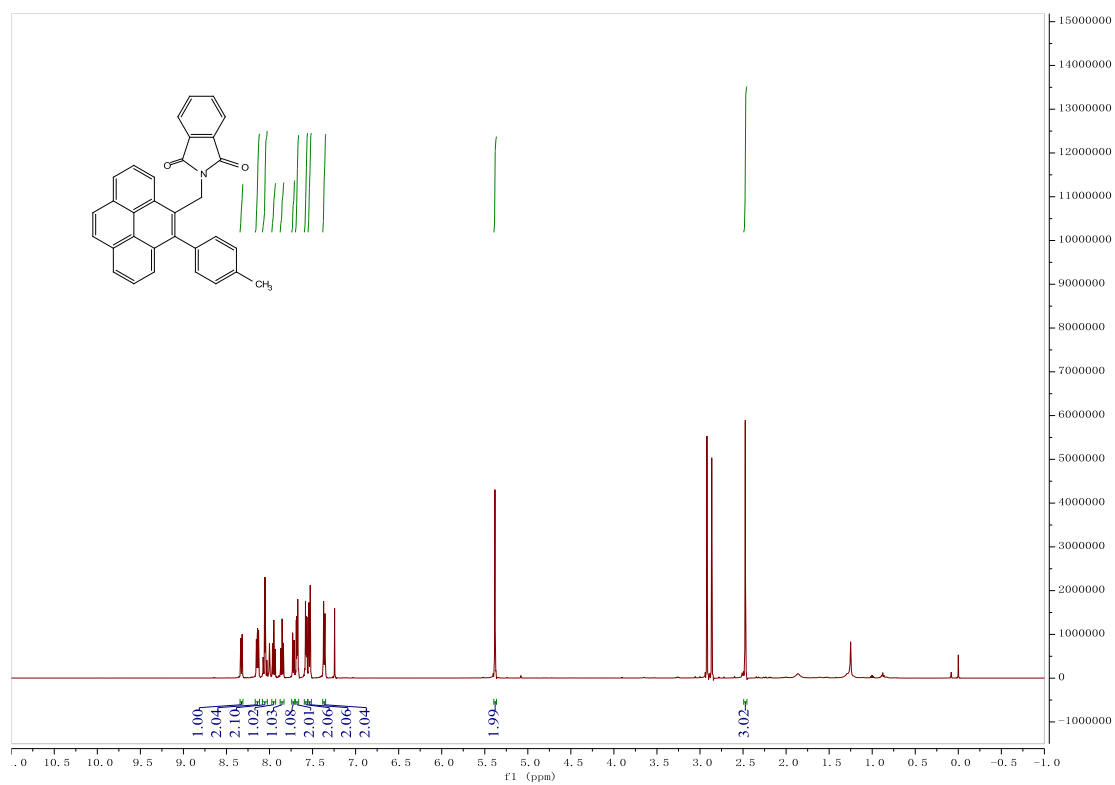



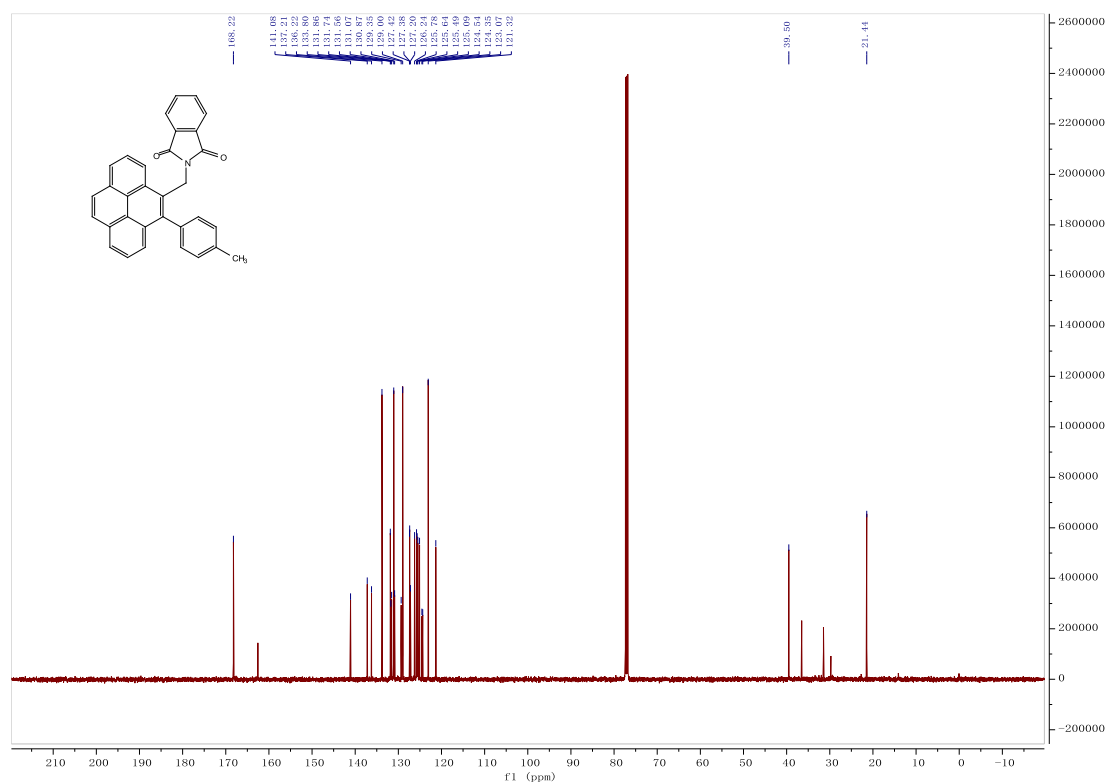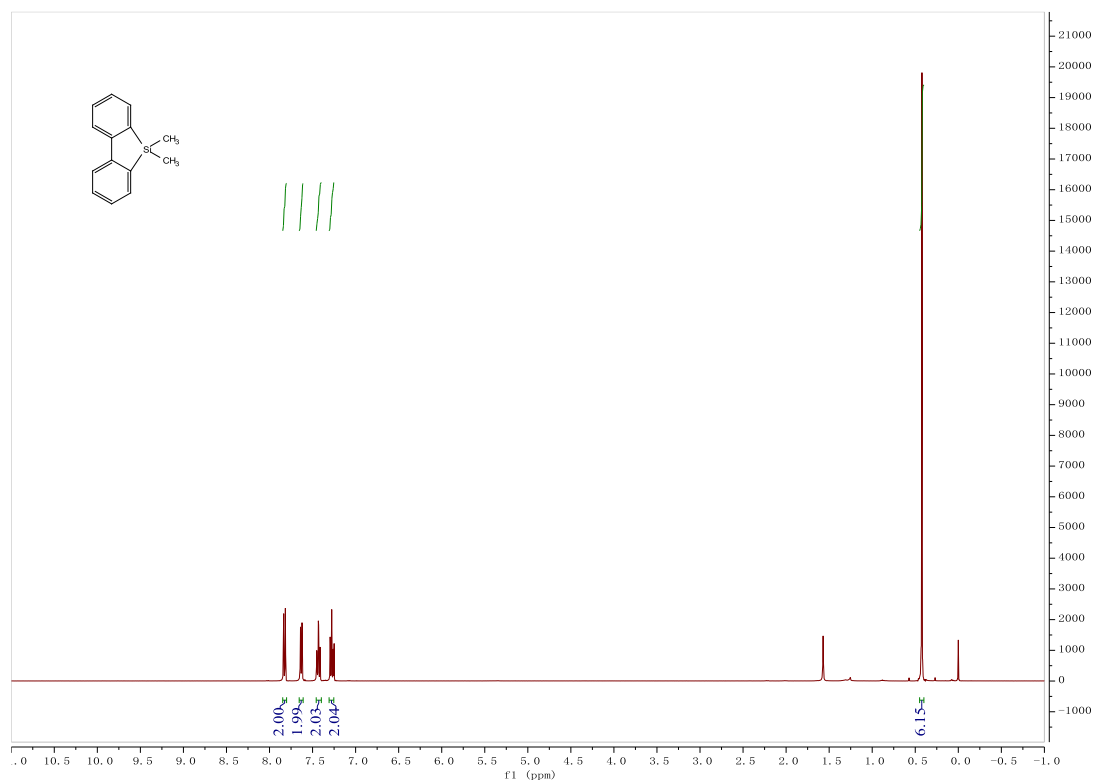

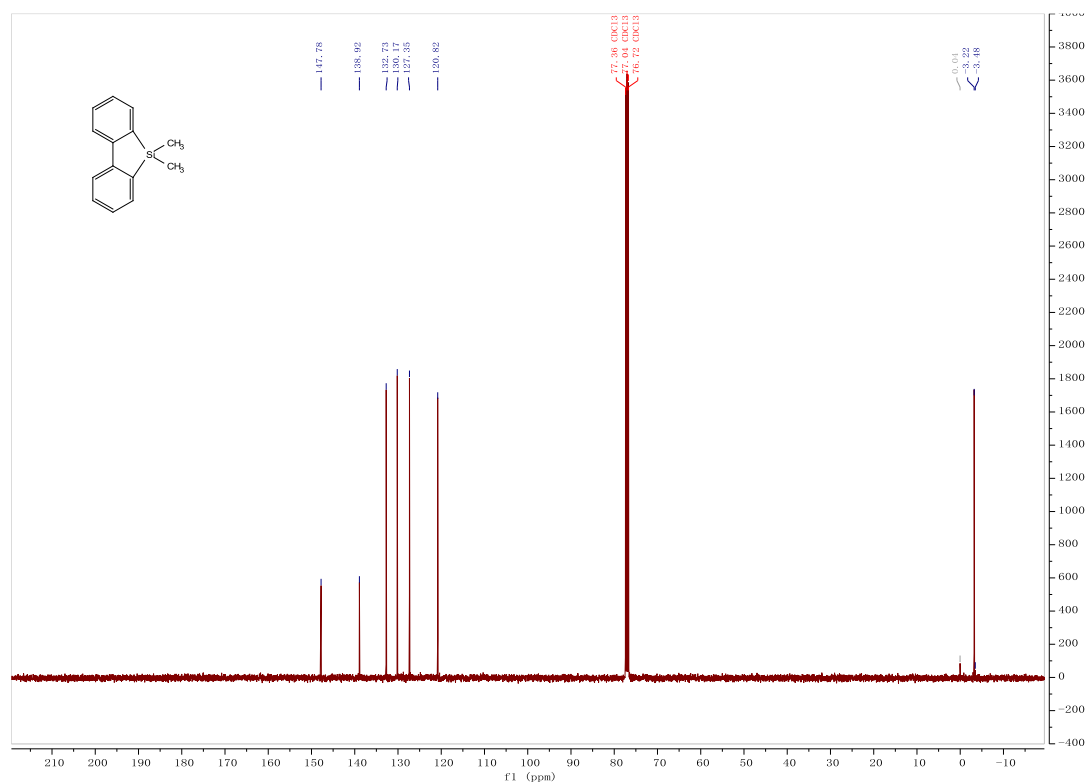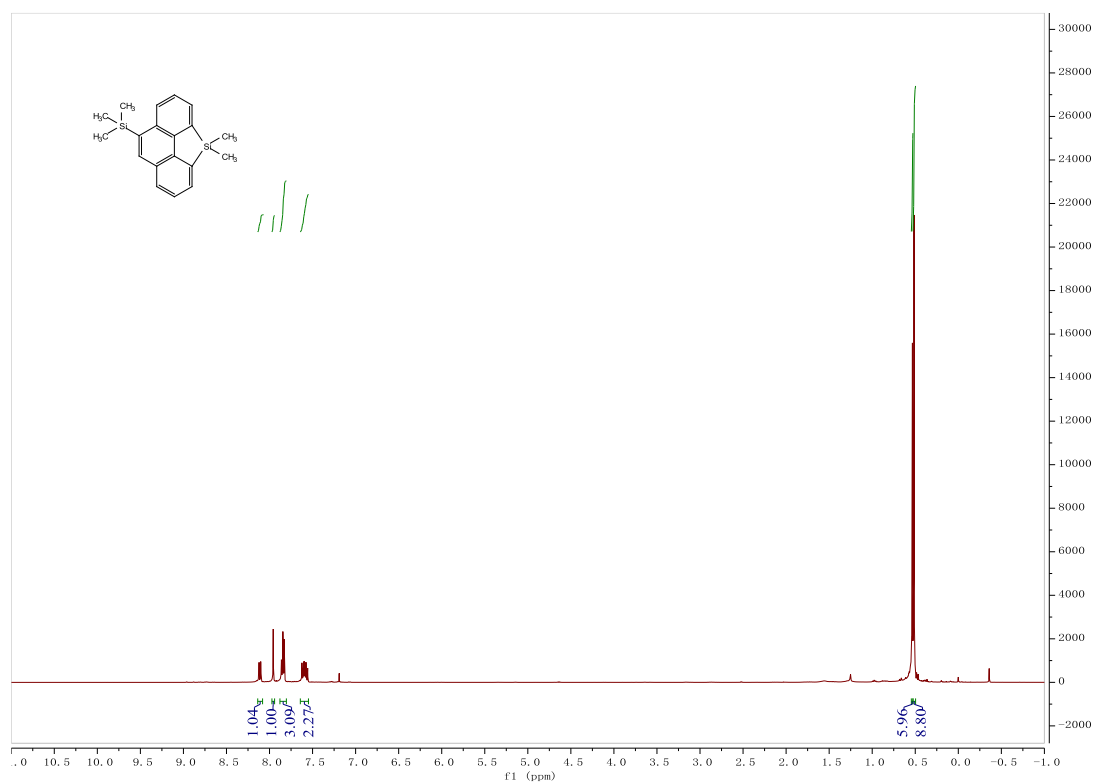

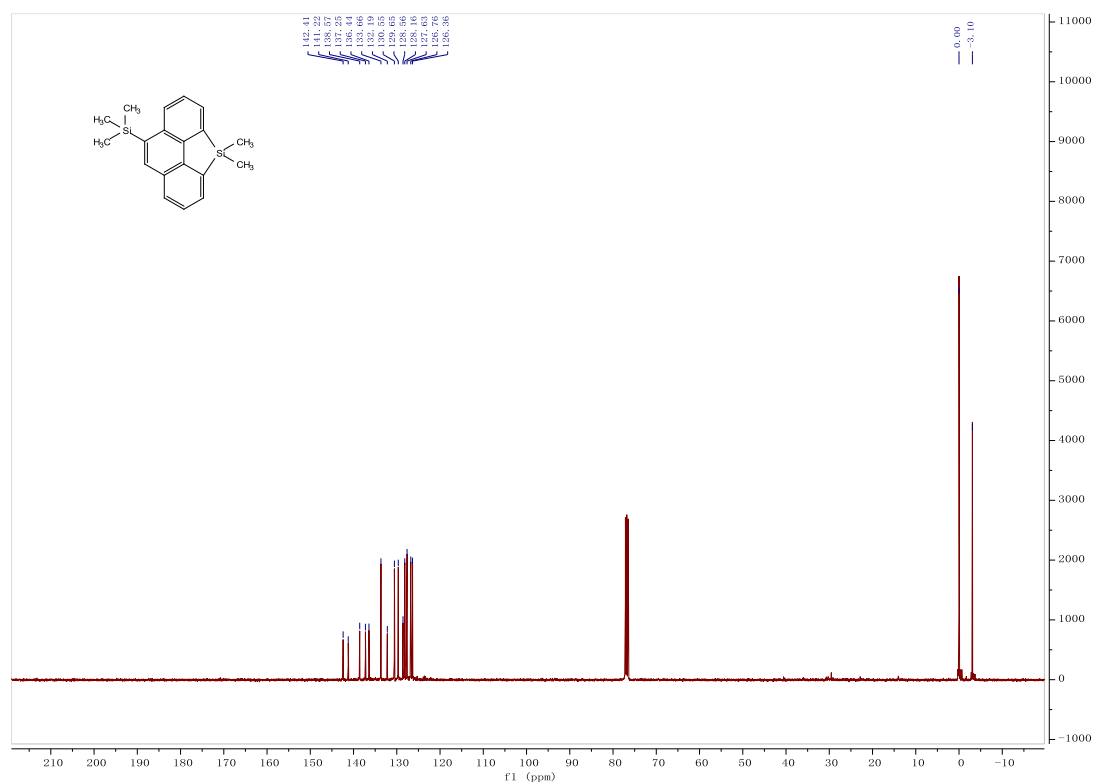

Supplement: d2qo01712a1.pdf [file d2qo01712a1.pdf]
